# Supplementary material for: Metagenomic and Metabolomic Correlates of Immunotherapy Response in Non-Small Cell Lung Cancer
Source: Research Square preprint supplement (doi:10.21203/rs.3.rs-10107631/v1), 2026-07-09
Supplement: Supplementary file 1 [file 06982ba025db2a422241a9c3.docx]

**Supplementary Table 6.** **Strongest associations of microbial species with circulating lipids among patients diagnosed with NSCLC, N=35.**

| Lipid | Microbiome | R2 | P-value |
| --- | --- | --- | --- |
| CAR 16:0 | Bifidobacterium longum | -0.37 | 0.04 |
| CAR 19:4 | Prevotella copri | -0.37 | 0.04 |
| DG 34:3|DG 16:1_18:2 | Bifidobacterium longum | -0.40 | 0.02 |
| DG 50:1 | Alistipes putredinis | 0.36 | 0.04 |
| DG 50:1 | Bifidobacterium longum | 0.41 | 0.02 |
| DG O-35:2|DG O-21:1_14:1 | Alistipes putredinis | 0.36 | 0.04 |
| DG O-35:2|DG O-21:1_14:1 | Prevotella copri | -0.40 | 0.02 |
| LPC 14:0 | Prevotella copri | 0.39 | 0.03 |
| LPC 14:0/0:0 | Prevotella copri | 0.38 | 0.03 |
| LPC 15:0/0:0 | Prevotella copri | 0.49 | <0.001 |
| LPC 17:0/0:0 | Akkermansia muciniphila | 0.40 | 0.02 |
| LPC 18:0 | Prevotella copri | 0.40 | 0.02 |
| LPC 18:1/0:0 | Prevotella copri | 0.39 | 0.03 |
| LPC 18:2 | Prevotella copri | 0.40 | 0.02 |
| LPC 19:0/0:0 | Akkermansia muciniphila | 0.40 | 0.02 |
| LPC 19:0/0:0 | Prevotella copri | 0.41 | 0.02 |
| LPC 20:1/0:0 | Akkermansia muciniphila | 0.50 | <0.001 |
| LPC 20:1/0:0 | Prevotella copri | 0.40 | 0.02 |
| LPC 20:2/0:0 | Akkermansia muciniphila | 0.42 | 0.02 |
| LPC 20:2/0:0 | Prevotella copri | 0.40 | 0.02 |
| LPC 22:6/0:0 | Prevotella copri | 0.38 | 0.03 |
| LPC O-24:0 | Alistipes putredinis | 0.39 | 0.03 |
| LPE 20:4 | Alistipes putredinis | 0.38 | 0.03 |
| NAE 14:1 | Prevotella copri | 0.44 | 0.01 |
| NAE 21:4 | Prevotella copri | 0.40 | 0.02 |
| NAGly 22:3;O | Prevotella copri | 0.43 | 0.02 |
| PC 32:2|PC 14:0_18:2 | Prevotella copri | 0.39 | 0.03 |
| PC 34:2 | Prevotella copri | -0.38 | 0.03 |
| PC 36:4b | Prevotella copri | -0.37 | 0.03 |
| PC 37:4 | Alistipes putredinis | 0.53 | <0.001 |
| PC 37:6b | Prevotella copri | -0.41 | 0.02 |
| PC 39:5 | Akkermansia muciniphila | 0.40 | 0.02 |
| PC 40:6 | Akkermansia muciniphila | 0.59 | <0.001 |
| PC 40:7|PC 18:1_22:6 | Akkermansia muciniphila | 0.39 | 0.03 |
| PC 42:8 | Akkermansia muciniphila | 0.44 | 0.01 |
| PE P-40:4|PE P-20:0_20:4 | Alistipes putredinis | 0.38 | 0.03 |
| PI 38:4b | Alistipes putredinis | 0.39 | 0.03 |
| SM 33:0;2O | Alistipes putredinis | 0.39 | 0.03 |
| SM 33:1;2O|SM 17:1;2O/16:0 | Alistipes putredinis | 0.38 | 0.03 |
| SM 38:3;2O|SM 23:1;2O/15:2 | Akkermansia muciniphila | 0.48 | <0.001 |
| TG 58:6|TG 18:0_18:1_22:5 | Prevotella copri | -0.41 | 0.02 |
| TG 58:6|TG 18:2_20:2_20:2 | Prevotella copri | -0.41 | 0.02 |

Coefficients of partial Spearman for the strongest correlation tests between CLR z-score transformed microbiome relative abundance at the species level with normalized and z-scored transformed circulating metabolites. Models were adjusted for sex, age at diagnosis, and BMI (kg/m2).
