# Supplementary material for: Metagenomic and Metabolomic Correlates of Immunotherapy Response in Non-Small Cell Lung Cancer
Source: Research Square preprint supplement (doi:10.21203/rs.3.rs-10107631/v1), 2026-07-09
Supplement: Supplementary file 2 [file 43d17be17871a6d2b5e05907.docx]

**Supplementary Table 3. Associations1 of metabolites with clinical benefit (versus no benefit) among patients diagnosed with NSCLC at Moffitt Cancer Center, N=62**

| Metabolite | Clinical Benefit, N=30 | No Clinical Benefit, N=32 | OR 95% CI | P |
| --- | --- | --- | --- | --- |
| 4-Imidazoleacetate | 0.91 (0.83) | 0.30 (0.40) | 6.34 (2.36, 22.29) | 0.001 |
| 6-Bromotryptophan | 1.18 (0.39) | 0.89 (0.27) | 3.84 (1.80, 10.17) | 0.002 |
| N-Acetylarginine | 1.19 (0.64) | 0.83 (0.48) | 2.51 (1.31, 5.47) | 0.01 |
| 4-Chlorobenzoic-Acid | 1.08 (0.29) | 0.90 (0.20) | 2.51 (1.32, 5.46) | 0.01 |
| 4-Ethylcatechol-Sulfate | 2.02 (2.08) | 1.13 (1.34) | 2.44 (1.24, 5.52) | 0.02 |
| Fructose | 0.96 (0.52) | 2.04 (1.76) | 0.23 (0.05, 0.61) | 0.02 |
| Pipecolate | 1.03 (0.55) | 1.40 (0.78) | 0.43 (0.19, 0.81) | 0.02 |
| Guanidinoacetate | 1.11 (0.50) | 0.87 (0.34) | 2.19 (1.19, 4.61) | 0.02 |
| 4-Vinylphenol-Sulfate | 2.48 (2.76) | 1.32 (1.44) | 2.29 (1.20, 5.03) | 0.02 |
| Glucose | 0.93 (0.21) | 1.15 (0.35) | 0.24 (0.06, 0.65) | 0.02 |
| 3-Indoxyl-Sulfate | 1.32 (1.01) | 0.85 (0.48) | 2.78 (1.31, 7.46) | 0.02 |
| 3-5-Dichloro-2-6-Dihydroxybenzoic-Acid | 1.12 (0.31) | 0.95 (0.34) | 2.07 (1.15, 4.10) | 0.02 |
| Dimethyl-Sulfone | 0.42 (0.41) | 2.00 (5.34) | 0.01 (0.00, 0.25) | 0.02 |
| Stachydrine | 1.18 (1.22) | 2.45 (2.73) | 0.46 (0.20, 0.85) | 0.03 |
| Butyrylcarnitine-C4 | 1.46 (0.90) | 0.99 (0.64) | 2.48 (1.22, 6.22) | 0.03 |
| N-Methylproline | 1.77 (2.12) | 5.15 (7.10) | 0.37 (0.12, 0.77) | 0.03 |
| 1-Carboxyethyltyrosine | 0.84 (0.49) | 1.34 (0.97) | 0.44 (0.20, 0.86) | 0.03 |
| Eicosenedioate-C20-1-Dc* | 1.10 (1.02) | 0.59 (0.66) | 2.03 (1.14, 4.09) | 0.03 |
| Homoarginine | 1.01 (0.39) | 0.85 (0.41) | 2.04 (1.11, 4.01) | 0.03 |
| 6-Hydroxyindole-Sulfate | 1.51 (1.35) | 0.94 (0.58) | 2.73 (1.24, 7.68) | 0.03 |
| 3beta-Hydroxy-5-Cholestenoate | 1.17 (0.48) | 0.96 (0.36) | 1.99 (1.11, 3.95) | 0.03 |
| Gamma-Cehc | 1.73 (1.86) | 0.99 (0.76) | 3.47 (1.27, 11.98) | 0.03 |
| 3-Hydroxypyridine-Sulfate | 1.89 (1.75) | 1.23 (1.41) | 2.04 (1.10, 4.23) | 0.03 |
| 1-5-Anhydroglucitol-1-5-Ag | 1.14 (0.53) | 0.91 (0.41) | 1.98 (1.09, 4.00) | 0.04 |
| Tryptophan | 1.04 (0.28) | 0.89 (0.31) | 1.88 (1.07, 3.56) | 0.04 |
| Betaine | 1.09 (0.22) | 0.97 (0.28) | 1.89 (1.07, 3.66) | 0.04 |
| 3-Amino-2-Piperidone | 1.24 (0.53) | 1.02 (0.36) | 1.95 (1.07, 3.87) | 0.04 |
| Citrulline | 1.18 (0.47) | 0.95 (0.39) | 1.95 (1.07, 3.91) | 0.04 |
| Octanoylcarnitine-C8 | 1.41 (0.81) | 1.01 (0.62) | 1.98 (1.07, 4.04) | 0.04 |
| N-Acetylcitrulline | 1.16 (1.44) | 0.59 (0.62) | 2.71 (1.20, 8.03) | 0.04 |
| 3-Methyl-Catechol-Sulfate-2 | 1.06 (1.08) | 0.70 (0.69) | 2.05 (1.09, 4.56) | 0.05 |
| Ascorbic-Acid-3-Sulfate* | 1.20 (0.85) | 2.01 (1.76) | 0.42 (0.16, 0.86) | 0.05 |
| Propionylglycine-C3 | 1.19 (0.74) | 0.83 (0.62) | 1.97 (1.07, 4.12) | 0.05 |
| Mannose | 1.02 (0.34) | 1.34 (0.71) | 0.48 (0.21, 0.91) | 0.05 |
| Aconitate-[Cis-Or-Trans] | 0.96 (0.28) | 1.06 (0.25) | 0.46 (0.20, 0.95) | 0.05 |
| Thioproline | 1.02 (0.26) | 0.93 (0.24) | 1.88 (1.04, 3.70) | 0.05 |
| N-Palmitoylglycine | 1.04 (0.37) | 0.84 (0.33) | 1.89 (1.05, 3.73) | 0.05 |
| Pentose-Acid* | 1.30 (1.06) | 2.00 (2.13) | 0.45 (0.18, 0.91) | 0.05 |
| Laurate-12-0 | 1.18 (0.80) | 1.74 (1.37) | 0.50 (0.23, 0.95) | 0.05 |
| 11beta-Hydroxyandrosterone-Glucuronide | 1.16 (0.66) | 0.93 (0.75) | 2.31 (1.07, 5.87) | 0.05 |
| Bilirubin | 1.21 (0.65) | 0.98 (0.50) | 2.06 (1.05, 4.71) | 0.06 |
| 3beta-7alpha-Dihydroxy-5-Cholestenoate | 1.10 (0.36) | 0.96 (0.31) | 1.82 (1.01, 3.53) | 0.06 |
| 1-Carboxyethylphenylalanine | 1.05 (0.60) | 1.49 (0.99) | 0.54 (0.27, 1.00) | 0.06 |
| N2-Acetyl-N6-Methyllysine | 0.97 (1.40) | 0.43 (0.46) | 2.56 (1.11, 7.76) | 0.06 |
| 3-Phenylpropionate-Hydrocinnamate | 1.56 (1.63) | 0.97 (1.55) | 2.01 (1.02, 4.52) | 0.06 |
| Androsterone-Glucuronide | 1.37 (1.48) | 0.96 (0.73) | 2.04 (1.06, 4.96) | 0.07 |
| Indoleacetate | 1.26 (0.79) | 1.00 (0.42) | 1.95 (1.01, 4.36) | 0.07 |
| S-1-Pyrroline-5-Carboxylate | 0.91 (0.57) | 0.70 (0.54) | 1.73 (0.98, 3.32) | 0.07 |
| Arginine | 1.11 (0.52) | 0.95 (0.40) | 1.81 (0.99, 3.69) | 0.07 |
| Ornithine | 1.21 (0.64) | 0.96 (0.30) | 2.06 (1.04, 4.95) | 0.07 |
| 3-Ureidopropionate | 0.70 (0.38) | 0.94 (0.57) | 0.58 (0.30, 1.03) | 0.08 |
| 3-Methyl-Catechol-Sulfate-1 | 1.34 (1.33) | 0.93 (0.96) | 1.73 (0.97, 3.48) | 0.09 |
| Succinimide | 0.57 (0.48) | 0.89 (0.87) | 0.52 (0.22, 1.00) | 0.09 |
| Caproate-6-0 | 1.09 (0.27) | 1.00 (0.20) | 1.67 (0.94, 3.15) | 0.09 |
| Phenylalanine | 1.04 (0.21) | 0.97 (0.24) | 1.69 (0.94, 3.24) | 0.09 |
| Carnitine | 1.03 (0.20) | 0.95 (0.29) | 1.74 (0.95, 3.52) | 0.09 |
| Alpha-Hydroxycaproate | 0.80 (0.33) | 1.00 (0.64) | 0.55 (0.24, 1.02) | 0.09 |
| Ethyl-Beta-Glucopyranoside | 1.77 (3.66) | 3.80 (5.87) | 0.51 (0.20, 1.00) | 0.10 |
| Cinnamoylglycine | 1.36 (2.22) | 0.54 (0.73) | 2.27 (1.05, 7.61) | 0.10 |
| 5-Hydroxylysine | 1.08 (0.36) | 1.48 (1.20) | 0.39 (0.11, 0.96) | 0.10 |
| Gamma-Glutamylvaline | 1.18 (0.51) | 1.01 (0.42) | 1.75 (0.95, 3.59) | 0.10 |
| Eicosenoylcarnitine-C20-1* | 1.42 (1.02) | 1.05 (0.59) | 1.92 (1.00, 4.68) | 0.10 |
| Malate | 1.03 (0.39) | 1.15 (0.32) | 0.56 (0.26, 1.07) | 0.10 |
| Caprylate-8-0 | 1.47 (1.15) | 1.15 (0.47) | 1.74 (0.96, 3.79) | 0.10 |
| Xanthine | 1.53 (1.60) | 1.06 (0.33) | 1.97 (1.03, 5.86) | 0.10 |
| Cortolone-Glucuronide-1 | 1.18 (0.66) | 0.99 (0.57) | 1.84 (0.93, 4.07) | 0.10 |
| Chiro-Inositol | 0.39 (0.40) | 1.85 (3.47) | 0.23 (0.02, 0.73) | 0.10 |
| Palmitoyl-Sphingosine-Phosphoethanolamine-D18-1-16-0 | 0.99 (0.24) | 1.06 (0.24) | 0.61 (0.33, 1.09) | 0.10 |
| Butyrylglycine-C4 | 1.05 (0.44) | 0.87 (0.31) | 1.60 (0.92, 2.95) | 0.11 |
| Taurine | 1.35 (0.66) | 1.11 (0.36) | 1.84 (0.98, 4.28) | 0.11 |
| Ethylmalonate | 1.54 (1.27) | 1.07 (0.41) | 2.10 (1.01, 6.33) | 0.11 |
| 3-Formylindole | 1.14 (0.43) | 0.98 (0.48) | 1.64 (0.92, 3.13) | 0.11 |
| N-Acetylcarnosine | 1.20 (0.73) | 1.04 (0.65) | 1.75 (0.93, 3.76) | 0.11 |
| Bilirubin-E-Z-Or-Z-E* | 1.25 (0.86) | 1.03 (0.61) | 1.69 (0.92, 3.46) | 0.11 |
| 3-Bromo-5-Chloro-2-6-Dihydroxybenzoic-Acid* | 1.11 (0.35) | 0.97 (0.43) | 1.61 (0.90, 3.02) | 0.12 |
| Retinol-Vitamin-A | 1.10 (0.36) | 0.95 (0.46) | 1.67 (0.90, 3.33) | 0.12 |
| 1-Carboxyethylisoleucine | 0.98 (0.66) | 1.35 (0.91) | 0.61 (0.31, 1.11) | 0.12 |
| 3-Hydroxydecanoylcarnitine | 1.27 (0.71) | 1.02 (0.59) | 1.68 (0.90, 3.41) | 0.12 |
| Perfluorooctanoate-Pfoa | 1.29 (1.03) | 0.96 (0.43) | 1.88 (0.94, 4.66) | 0.12 |
| N6-N6-N6-Trimethyllysine | 1.24 (0.65) | 1.06 (0.46) | 1.57 (0.91, 2.93) | 0.13 |
| Deoxycarnitine | 1.02 (0.36) | 0.93 (0.20) | 1.64 (0.92, 3.38) | 0.13 |
| 5-Methyluridine-Ribothymidine | 1.02 (0.23) | 1.08 (0.26) | 0.62 (0.32, 1.12) | 0.13 |
| Argininate* | 1.32 (1.45) | 0.91 (0.83) | 1.73 (0.94, 3.88) | 0.13 |
| Branched-Chain-Straight-Chain-Or-Cyclopropyl-10-1-Fatty-Acid-3* | 0.60 (0.52) | 0.80 (0.88) | 0.61 (0.30, 1.11) | 0.13 |
| Iminodiacetate-Ida | 1.09 (0.40) | 0.97 (0.25) | 1.61 (0.91, 3.22) | 0.13 |
| Isoursodeoxycholate-Sulfate-1 | 0.63 (0.52) | 0.91 (0.95) | 0.59 (0.28, 1.13) | 0.13 |
| Pantothenate-Vitamin-B5 | 1.41 (1.46) | 1.97 (1.91) | 0.61 (0.30, 1.12) | 0.13 |
| Biliverdin | 1.25 (0.74) | 0.98 (0.59) | 1.70 (0.90, 3.67) | 0.13 |
| Hydroxy-Cmpf* | 2.62 (3.14) | 1.55 (1.90) | 1.75 (0.91, 4.03) | 0.13 |
| 2-3-Dihydroxy-2-Methylbutyrate | 0.57 (0.51) | 0.89 (1.04) | 0.53 (0.20, 1.09) | 0.13 |
| 3-Hydroxybutyrate-Bhba | 1.75 (1.84) | 4.41 (8.03) | 0.46 (0.11, 0.98) | 0.14 |
| Decanoylcarnitine-C10 | 1.44 (0.96) | 1.09 (0.74) | 1.61 (0.89, 3.21) | 0.14 |
| 6-Oxopiperidine-2-Carboxylate | 1.19 (0.64) | 1.49 (0.97) | 0.64 (0.34, 1.12) | 0.14 |
| Branched-Chain-Straight-Chain-Or-Cyclopropyl-10-1-Fatty-Acid-2* | 0.90 (0.37) | 1.02 (0.50) | 0.64 (0.34, 1.13) | 0.14 |
| Cysteinylglycine | 1.33 (1.38) | 0.96 (0.32) | 2.14 (1.00, 7.02) | 0.14 |
| Taurolithocholate-3-Sulfate | 2.25 (2.35) | 1.57 (1.57) | 1.61 (0.89, 3.24) | 0.14 |
| N-Acetylputrescine | 1.00 (0.53) | 1.36 (1.21) | 0.53 (0.18, 1.03) | 0.14 |
| 4-Acetylphenyl-Sulfate | 1.20 (0.98) | 0.94 (0.91) | 1.60 (0.88, 3.13) | 0.14 |
| R-3-Hydroxybutyrylcarnitine | 0.76 (0.88) | 1.51 (2.45) | 0.48 (0.16, 1.05) | 0.14 |
| Indolepropionate | 1.35 (1.53) | 0.92 (0.78) | 1.77 (0.94, 4.41) | 0.15 |
| 2-Hydroxybutyrate-2-Hydroxyisobutyrate | 1.04 (0.42) | 1.25 (0.66) | 0.62 (0.31, 1.15) | 0.15 |
| Glutamate | 1.16 (0.49) | 1.04 (0.37) | 1.59 (0.88, 3.17) | 0.15 |
| N-Acetylhistidine | 1.12 (0.97) | 0.85 (0.57) | 1.59 (0.89, 3.27) | 0.15 |
| Androstenediol-3alpha-17alpha-Monosulfate-2 | 0.94 (0.75) | 0.81 (0.56) | 1.62 (0.86, 3.30) | 0.15 |
| N-Acetylalanine | 1.20 (0.66) | 1.02 (0.23) | 1.79 (0.93, 4.85) | 0.15 |
| 5alpha-Androstan-3alpha-17beta-Diol-Monosulfate-1 | 1.51 (1.80) | 1.11 (1.42) | 1.57 (0.87, 3.16) | 0.15 |
| Ribulonate-Xylulonate-Lyxonate* | 0.95 (0.38) | 1.13 (0.61) | 0.65 (0.34, 1.14) | 0.16 |
| N-N-Dimethyl-5-Aminovalerate | 0.79 (1.13) | 1.20 (1.55) | 0.65 (0.34, 1.15) | 0.16 |
| N-Acetylasparagine | 1.85 (4.74) | 0.74 (0.58) | 8.36 (1.08, 210.54) | 0.16 |
| Aspartate | 1.61 (1.84) | 1.11 (0.55) | 2.09 (0.99, 8.24) | 0.16 |
| Catechol-Sulfate | 1.31 (0.93) | 1.06 (0.79) | 1.53 (0.86, 2.89) | 0.16 |
| Arachidonoylcarnitine-C20-4 | 1.82 (3.36) | 1.06 (0.61) | 6.52 (1.05, 105.11) | 0.16 |
| Glutamine | 1.03 (0.20) | 0.96 (0.19) | 1.55 (0.85, 2.97) | 0.17 |
| Sphinganine-1-Phosphate | 1.38 (0.91) | 1.07 (0.46) | 1.73 (0.92, 4.32) | 0.17 |
| Glycolithocholate-Sulfate* | 1.73 (2.07) | 1.14 (1.13) | 1.74 (0.90, 4.23) | 0.17 |
| Diphenhydramine | 0.11 (0.49) | 0.82 (2.32) | 0.41 (0.07, 0.96) | 0.17 |
| Dihomo-Linolenoylcarnitine-C20-3n3-Or-6* | 2.27 (5.68) | 1.05 (0.58) | 18.68 (1.09, 1529.18) | 0.17 |
| Phosphocholine | 1.12 (0.50) | 1.27 (0.55) | 0.66 (0.35, 1.16) | 0.17 |
| Urate | 1.12 (0.34) | 1.04 (0.29) | 1.53 (0.85, 2.94) | 0.17 |
| 4-Acetylcatechol-Sulfate-1 | 1.52 (1.70) | 1.04 (1.54) | 1.52 (0.86, 2.95) | 0.17 |
| 4-Hydroxyphenylpyruvate | 1.01 (0.45) | 1.33 (0.95) | 0.57 (0.22, 1.13) | 0.18 |
| 5-Hydroxy-2-Methylpyridine-Sulfate | 1.44 (1.65) | 1.08 (1.56) | 1.51 (0.85, 2.86) | 0.18 |
| Fumarate | 1.00 (0.51) | 1.16 (0.46) | 0.64 (0.31, 1.18) | 0.18 |
| P-Cresol-Sulfate | 1.27 (0.83) | 1.01 (0.77) | 1.51 (0.85, 2.94) | 0.18 |
| N-Stearoyltaurine | 0.95 (0.44) | 0.83 (0.36) | 1.49 (0.85, 2.84) | 0.18 |
| 4-Vinylguaiacol-Sulfate | 1.19 (1.57) | 0.86 (1.01) | 1.56 (0.85, 3.22) | 0.18 |
| Spermidine | 1.60 (1.74) | 1.09 (0.68) | 1.58 (0.87, 3.54) | 0.18 |
| Salicyluric-Glucuronide* | 8.81 (23.53) | 2.96 (6.20) | 1.96 (0.95, 6.86) | 0.18 |
| N-Acetyl-1-Methylhistidine* | 1.29 (2.00) | 0.78 (0.64) | 2.13 (0.92, 7.70) | 0.19 |
| 4-Ethylphenyl-Sulfate | 3.21 (4.64) | 2.07 (3.32) | 1.53 (0.85, 3.16) | 0.19 |
| Isobutyrylcarnitine-C4 | 1.33 (0.97) | 1.09 (0.99) | 1.51 (0.84, 2.94) | 0.19 |
| Hydroxy-N6-N6-N6-Trimethyllysine* | 1.31 (0.81) | 1.09 (0.45) | 1.51 (0.85, 3.02) | 0.19 |
| Androsterone-Sulfate | 1.61 (1.59) | 1.30 (1.41) | 1.47 (0.84, 2.78) | 0.19 |
| N-Acetylglutamine | 1.88 (3.82) | 0.96 (0.45) | 5.74 (1.01, 121.52) | 0.20 |
| 1-Linoleoyl-Gpa-18-2* | 1.02 (0.68) | 0.80 (0.46) | 1.47 (0.83, 2.78) | 0.20 |
| 2'-Deoxyuridine | 1.05 (1.14) | 0.79 (0.43) | 1.58 (0.88, 3.74) | 0.20 |
| Glcnac-Sulfate-Conjugate-Of-C21h34o2-Steroid | 0.45 (0.36) | 1.03 (1.73) | 0.49 (0.10, 1.06) | 0.20 |
| Cis-4-Decenoylcarnitine-C10-1 | 1.29 (0.73) | 1.04 (0.70) | 1.45 (0.83, 2.66) | 0.20 |
| Palmitoleoylcarnitine-C16-1* | 1.33 (0.81) | 1.08 (0.65) | 1.50 (0.83, 2.95) | 0.20 |
| Eicosanedioate-C20-Dc | 1.13 (0.55) | 0.94 (0.44) | 1.44 (0.84, 2.63) | 0.20 |
| 2-Aminooctanoate | 1.04 (0.54) | 1.35 (1.36) | 0.61 (0.24, 1.13) | 0.20 |
| 2-Hydroxy-3-Methylvalerate | 1.12 (1.06) | 1.98 (3.25) | 0.47 (0.10, 1.09) | 0.20 |
| 3-Acetylphenol-Sulfate | 1.26 (1.12) | 0.94 (1.34) | 1.50 (0.83, 3.00) | 0.20 |
| Hypoxanthine | 1.43 (1.31) | 1.19 (0.62) | 1.51 (0.83, 3.18) | 0.21 |
| N-Acetyl-Cadaverine | 0.61 (0.60) | 1.23 (2.27) | 0.54 (0.15, 1.10) | 0.21 |
| Margaroylcarnitine-C17* | 1.36 (0.92) | 1.09 (0.73) | 1.48 (0.83, 2.97) | 0.21 |
| 3-Hydroxyoleate* | 0.91 (0.57) | 1.14 (0.91) | 0.63 (0.28, 1.18) | 0.21 |
| Phenylpyruvate | 1.83 (3.07) | 1.06 (0.37) | 6.82 (1.13, 189.49) | 0.21 |
| Alpha-Hydroxyisovalerate | 1.24 (1.23) | 1.94 (3.01) | 0.61 (0.21, 1.15) | 0.21 |
| Glucuronate | 1.20 (0.79) | 1.51 (1.40) | 0.69 (0.36, 1.20) | 0.21 |
| Carotene-Diol-3 | 1.30 (1.09) | 0.98 (0.64) | 1.49 (0.82, 2.96) | 0.21 |
| Erythritol | 27.05 (74.04) | 2.90 (9.79) | 2.47 (1.06, 34.18) | 0.22 |
| N-Acetylglucosamine-N-Acetylgalactosamine | 1.29 (0.90) | 1.08 (0.41) | 1.51 (0.83, 3.21) | 0.22 |
| Glutarate-C5-Dc | 1.99 (3.48) | 1.32 (1.11) | 1.54 (0.86, 3.75) | 0.22 |
| 5alpha-Androstan-3alpha-17alpha-Diol-Monosulfate | 1.07 (1.22) | 0.88 (0.92) | 1.49 (0.81, 3.02) | 0.22 |
| Umbelliferone-Sulfate | 1.09 (2.33) | 2.54 (5.45) | 0.61 (0.21, 1.14) | 0.22 |
| Valine | 1.05 (0.22) | 1.01 (0.32) | 1.50 (0.79, 3.02) | 0.22 |
| Palmitoylcarnitine-C16 | 1.44 (1.46) | 1.04 (0.46) | 2.63 (0.96, 15.01) | 0.22 |
| Glucuronide-Of-C10h18o2-8* | 0.58 (1.67) | 1.14 (1.83) | 0.66 (0.30, 1.21) | 0.23 |
| Choline | 1.03 (0.28) | 0.98 (0.26) | 1.45 (0.80, 2.75) | 0.23 |
| 3-Hydroxy-2-Methylpyridine-Sulfate | 1.34 (1.38) | 1.09 (1.58) | 1.48 (0.79, 2.91) | 0.23 |
| 2-Ketocaprylate | 1.07 (0.52) | 1.26 (1.03) | 0.67 (0.30, 1.19) | 0.23 |
| Heptenedioate-C7-1-Dc* | 1.17 (0.98) | 1.41 (0.83) | 0.69 (0.37, 1.24) | 0.23 |
| Metabolonic-Lactone-Sulfate | 1.46 (1.33) | 1.15 (0.86) | 1.46 (0.83, 2.96) | 0.23 |
| 3-Methoxycatechol-Sulfate-2 | 1.23 (1.37) | 0.86 (1.16) | 1.50 (0.81, 3.19) | 0.23 |
| S-Allylcysteine | 0.93 (1.59) | 2.03 (4.29) | 0.59 (0.20, 1.19) | 0.23 |
| Nonanoylcarnitine-C9 | 0.81 (0.63) | 0.63 (0.46) | 1.48 (0.80, 2.94) | 0.23 |
| Isovalerylcarnitine-C5 | 1.43 (1.07) | 1.25 (1.21) | 1.49 (0.79, 2.98) | 0.23 |
| Glucuronide-Of-C10h18o2-7* | 2.58 (8.37) | 5.58 (11.17) | 0.67 (0.30, 1.22) | 0.23 |
| 5alpha-Androstan-3beta-17beta-Diol-Monosulfate-2 | 1.14 (1.70) | 0.89 (0.95) | 1.52 (0.82, 3.55) | 0.23 |
| Pyridoxate | 2.34 (3.26) | 7.13 (19.95) | 0.39 (0.05, 1.10) | 0.23 |
| Undecenoylcarnitine-C11-1 | 1.35 (0.77) | 1.12 (0.67) | 1.40 (0.82, 2.54) | 0.23 |
| Orotidine | 3.04 (9.47) | 1.05 (0.61) | 28.30 (0.94, 14305.73) | 0.24 |
| 1-Methyl-4-Imidazoleacetate | 1.21 (0.62) | 1.03 (0.40) | 1.42 (0.82, 2.66) | 0.24 |
| Citraconate-Glutaconate | 1.77 (1.85) | 1.59 (1.78) | 1.50 (0.78, 3.06) | 0.24 |
| Hydroxyasparagine | 1.34 (0.94) | 1.10 (0.35) | 1.81 (0.85, 5.79) | 0.24 |
| Epiandrosterone-Sulfate | 1.67 (2.01) | 1.40 (1.51) | 1.43 (0.81, 2.73) | 0.24 |
| Dihydrocaffeate-Sulfate-2 | 1.82 (3.35) | 1.09 (1.35) | 1.60 (0.87, 4.44) | 0.24 |
| N-Acetylleucine | 1.29 (1.28) | 1.04 (0.49) | 1.78 (0.88, 6.16) | 0.24 |
| Glycerol-3-Phosphate | 1.09 (1.25) | 0.89 (0.64) | 1.41 (0.82, 2.75) | 0.24 |
| Myristoylcarnitine-C14 | 1.33 (0.84) | 1.10 (0.61) | 1.43 (0.81, 2.86) | 0.24 |
| Sphingosine-1-Phosphate | 1.20 (0.50) | 1.07 (0.26) | 1.46 (0.82, 3.10) | 0.24 |
| N1-Methyl-2-Pyridone-5-Carboxamide | 1.24 (0.90) | 1.75 (2.49) | 0.62 (0.22, 1.19) | 0.24 |
| 2-Hydroxyarachidate* | 1.10 (0.52) | 0.98 (0.42) | 1.41 (0.81, 2.64) | 0.24 |
| Erythronate* | 1.23 (0.70) | 1.08 (0.36) | 1.44 (0.81, 2.88) | 0.24 |
| O-Hydroxyatorvastatin | 0.41 (0.48) | 1.07 (2.44) | 0.50 (0.09, 1.11) | 0.24 |
| Pregabalin | 0.36 (0.04) | 0.42 (0.27) | 0.55 (0.07, 1.12) | 0.24 |
| Cortisol | 0.99 (0.35) | 1.07 (0.50) | 0.71 (0.39, 1.24) | 0.24 |
| N-Delta-Acetylornithine | 0.99 (0.50) | 1.39 (1.89) | 0.47 (0.10, 1.09) | 0.24 |
| 2-Hydroxyphytanate* | 1.29 (0.75) | 1.06 (0.60) | 1.40 (0.81, 2.58) | 0.25 |
| 2-Naphthol-Sulfate | 2.16 (3.58) | 1.62 (1.77) | 1.42 (0.81, 2.82) | 0.25 |
| Hippurate | 1.27 (0.94) | 1.60 (1.20) | 0.71 (0.37, 1.24) | 0.25 |
| Hexanoylcarnitine-C6 | 1.17 (0.56) | 1.00 (0.65) | 1.44 (0.79, 2.82) | 0.25 |
| Alpha-Ketobutyrate | 1.01 (0.42) | 1.14 (0.59) | 0.69 (0.36, 1.28) | 0.25 |
| Creatinine | 1.07 (0.36) | 1.00 (0.19) | 1.47 (0.81, 3.16) | 0.25 |
| Saccharin | 17.05 (57.91) | 0.83 (1.11) | 236.03 (1.16, 156429927.01) | 0.25 |
| 1-Methylnicotinamide | 0.97 (0.93) | 1.77 (3.31) | 0.47 (0.10, 1.08) | 0.25 |
| Inosine | 1.03 (0.63) | 1.19 (0.68) | 0.69 (0.34, 1.26) | 0.25 |
| N-Acetylvaline | 1.10 (0.70) | 0.98 (0.27) | 1.50 (0.82, 3.64) | 0.25 |
| Arachidate-20-0 | 1.03 (0.32) | 1.22 (0.72) | 0.65 (0.27, 1.21) | 0.25 |
| N-Acetylserine | 1.34 (1.17) | 1.10 (0.33) | 1.56 (0.84, 4.51) | 0.25 |
| Xanthurenate | 0.69 (0.34) | 0.85 (0.68) | 0.68 (0.33, 1.28) | 0.26 |
| Trimethylamine-N-Oxide | 1.34 (0.95) | 1.13 (0.70) | 1.43 (0.80, 2.85) | 0.26 |
| Heme | 3.26 (6.12) | 1.59 (2.51) | 1.77 (0.84, 5.95) | 0.26 |
| O-Desmethyltramadol | 0.07 (0.20) | 0.25 (0.86) | 0.57 (0.14, 1.14) | 0.26 |
| Urea | 1.22 (0.72) | 1.07 (0.49) | 1.53 (0.80, 3.68) | 0.26 |
| Oleoyl-Ethanolamide | 1.07 (0.43) | 1.21 (0.69) | 0.72 (0.38, 1.25) | 0.27 |
| Gamma-Glutamylhistidine | 0.99 (0.31) | 0.90 (0.33) | 1.39 (0.79, 2.54) | 0.27 |
| Cysteine-S-Sulfate | 1.39 (0.76) | 1.20 (0.62) | 1.39 (0.79, 2.58) | 0.27 |
| 1-Methyl-5-Imidazoleacetate | 1.89 (3.16) | 1.17 (1.15) | 1.82 (0.85, 6.55) | 0.27 |
| Glucuronide-Of-C10h18o2-1* | 0.52 (1.33) | 0.91 (1.36) | 0.69 (0.30, 1.26) | 0.28 |
| Dimethylarginine-Adma-Sdma | 1.07 (0.36) | 1.00 (0.22) | 1.45 (0.77, 3.06) | 0.28 |
| Deoxycholate | 1.67 (3.25) | 1.03 (1.36) | 1.84 (0.82, 7.22) | 0.28 |
| O-Desmethyltramadol-Glucuronide | 0.46 (0.14) | 0.50 (0.23) | 0.70 (0.31, 1.27) | 0.28 |
| Bilirubin-E-E* | 1.16 (0.52) | 1.05 (0.53) | 1.37 (0.79, 2.49) | 0.28 |
| Propionylcarnitine-C3 | 1.17 (0.59) | 1.08 (0.74) | 1.42 (0.77, 2.75) | 0.28 |
| Cysteinylglycine-Disulfide* | 1.09 (0.31) | 1.00 (0.28) | 1.39 (0.78, 2.59) | 0.28 |
| Levulinoylcarnitine | 0.93 (0.88) | 0.79 (0.83) | 1.42 (0.77, 2.81) | 0.28 |
| Oleoylcarnitine-C18-1 | 1.43 (1.51) | 1.04 (0.42) | 1.98 (0.90, 8.90) | 0.28 |
| Taurochenodeoxycholic-Acid-3-Sulfate | 2.32 (3.76) | 1.70 (1.43) | 1.45 (0.80, 3.46) | 0.28 |
| Gamma-Cehc-Glucuronide* | 1.41 (1.56) | 0.98 (1.25) | 1.43 (0.77, 2.94) | 0.28 |
| O-Hydroxyatorvastatin-Lactone | 0.39 (0.18) | 0.79 (1.49) | 0.45 (0.03, 1.11) | 0.28 |
| Glycoursodeoxycholic-Acid-Sulfate-1 | 0.84 (0.90) | 1.16 (1.17) | 0.72 (0.39, 1.28) | 0.28 |
| N2-Acetyl-N6-N6-Dimethyllysine | 1.89 (3.26) | 1.15 (1.11) | 1.75 (0.83, 5.87) | 0.29 |
| Leukotriene-B4 | 0.91 (0.49) | 0.81 (0.36) | 1.38 (0.78, 2.64) | 0.29 |
| 1-Methylxanthine | 1.43 (1.26) | 1.18 (0.96) | 1.36 (0.78, 2.48) | 0.29 |
| Tramadol | 0.05 (0.16) | 0.29 (1.07) | 0.45 (0.05, 1.10) | 0.29 |
| Xylose | 0.93 (0.92) | 1.32 (1.82) | 0.66 (0.26, 1.22) | 0.29 |
| 2-Hydroxy-4-Methylthio-Butanoic-Acid | 1.16 (0.58) | 1.52 (1.65) | 0.71 (0.33, 1.26) | 0.30 |
| Taurodeoxycholic-Acid-3-Sulfate | 1.86 (2.71) | 1.37 (1.21) | 1.40 (0.79, 3.08) | 0.30 |
| N-N-N-Trimethyl-Alanylproline-Betaine-Tmap | 1.31 (1.03) | 1.10 (0.40) | 1.45 (0.79, 3.38) | 0.30 |
| Maltol-Sulfate | 1.01 (0.99) | 1.44 (1.95) | 0.69 (0.32, 1.35) | 0.30 |
| 3-4-Dihydroxybutyrate | 1.04 (0.40) | 1.17 (0.43) | 0.73 (0.39, 1.30) | 0.30 |
| 3-Indoleglyoxylic-Acid | 1.28 (0.59) | 1.15 (0.65) | 1.35 (0.78, 2.45) | 0.30 |
| Eicosapentaenoate-Epa-20-5n3 | 1.63 (1.39) | 1.24 (0.98) | 1.36 (0.78, 2.60) | 0.30 |
| Stearidonate-18-4n3 | 2.15 (3.31) | 1.31 (1.21) | 1.46 (0.80, 3.62) | 0.30 |
| 5alpha-Pregnan-3beta-20alpha-Diol-Monosulfate-2 | 1.18 (1.85) | 0.84 (1.08) | 1.38 (0.78, 2.88) | 0.30 |
| 5-Methylthioadenosine-Mta | 1.05 (0.52) | 1.21 (0.73) | 0.72 (0.38, 1.33) | 0.30 |
| Citrate | 0.91 (0.25) | 0.95 (0.16) | 0.73 (0.39, 1.31) | 0.30 |
| Sarcosine | 0.98 (0.38) | 1.09 (0.51) | 0.74 (0.40, 1.29) | 0.30 |
| 5alpha-Pregnan-3beta-20beta-Diol-Monosulfate-1 | 1.46 (1.48) | 1.17 (1.16) | 1.35 (0.77, 2.56) | 0.31 |
| Gulonate* | 1.35 (1.04) | 1.11 (0.67) | 1.43 (0.77, 3.13) | 0.31 |
| 4-Allylphenol-Sulfate | 3.06 (7.27) | 1.90 (2.33) | 1.41 (0.79, 3.47) | 0.31 |
| Atorvastatin-Lipitor | 0.41 (0.55) | 1.14 (3.10) | 0.54 (0.08, 1.17) | 0.31 |
| Imidazole-Propionate | 1.74 (2.84) | 1.24 (1.98) | 1.34 (0.77, 2.58) | 0.31 |
| Glutarylcarnitine-C5-Dc | 1.37 (1.12) | 1.13 (0.75) | 1.36 (0.76, 2.60) | 0.31 |
| Dihomo-Linoleoylcarnitine-C20-2* | 1.63 (2.43) | 1.05 (0.68) | 2.00 (0.89, 10.26) | 0.31 |
| Glycerol | 1.18 (0.89) | 1.32 (0.80) | 0.74 (0.38, 1.30) | 0.32 |
| N-Formylphenylalanine | 1.18 (0.80) | 1.03 (0.55) | 1.33 (0.78, 2.51) | 0.32 |
| Lignoceroylcarnitine-C24* | 1.07 (0.34) | 0.96 (0.38) | 1.32 (0.78, 2.30) | 0.32 |
| Cysteine-Glutathione-Disulfide | 1.45 (1.76) | 1.00 (0.77) | 1.60 (0.79, 4.91) | 0.32 |
| Desmethylnaproxen | 0.31 (0.31) | 0.60 (1.40) | 0.63 (0.16, 1.27) | 0.32 |
| 2-Hydroxystearate | 1.11 (0.43) | 1.03 (0.36) | 1.31 (0.77, 2.32) | 0.32 |
| Delta-Cehc | 1.57 (2.35) | 1.03 (0.71) | 1.64 (0.80, 5.59) | 0.32 |
| Cotinine | 0.18 (0.38) | 0.35 (0.69) | 0.73 (0.36, 1.29) | 0.32 |
| Quinolinate | 1.35 (2.11) | 0.96 (1.14) | 1.42 (0.76, 3.20) | 0.32 |
| Deoxycholic-Acid-Glucuronide | 2.52 (5.68) | 1.41 (1.36) | 1.65 (0.82, 6.04) | 0.32 |
| N-Palmitoylserine | 0.89 (0.49) | 0.81 (0.39) | 1.34 (0.76, 2.47) | 0.32 |
| Uracil | 1.11 (1.24) | 0.88 (0.32) | 1.53 (0.81, 5.33) | 0.32 |
| 2r-3r-Dihydroxybutyrate | 1.07 (0.52) | 1.23 (0.85) | 0.73 (0.37, 1.34) | 0.33 |
| 1-Carboxyethylvaline | 1.20 (0.82) | 1.48 (0.87) | 0.75 (0.40, 1.31) | 0.33 |
| 3-Methylthio-Acetaminophen-Sulfate* | 1.89 (5.75) | 3.08 (8.82) | 0.72 (0.32, 1.34) | 0.33 |
| Octadecanedioylcarnitine-C18-Dc* | 1.21 (0.55) | 1.41 (1.15) | 0.74 (0.38, 1.30) | 0.33 |
| 2-O-Methylascorbic-Acid | 1.07 (0.39) | 1.18 (0.51) | 0.76 (0.42, 1.32) | 0.33 |
| Myristoleoylcarnitine-C14-1* | 1.52 (1.03) | 1.25 (0.92) | 1.35 (0.75, 2.55) | 0.33 |
| Thymol-Sulfate | 1.91 (2.73) | 4.54 (11.25) | 0.66 (0.20, 1.28) | 0.33 |
| 1-Linoleoyl-Gpg-18-2* | 0.97 (0.49) | 1.08 (0.43) | 0.76 (0.41, 1.31) | 0.33 |
| Orotate | 1.41 (1.78) | 1.10 (0.49) | 1.47 (0.80, 4.67) | 0.33 |
| Sucrose | 1.67 (1.93) | 3.24 (6.81) | 0.65 (0.20, 1.25) | 0.34 |
| Sulfate-Of-Piperine-Metabolite-C16h19no3-2* | 1.24 (0.96) | 1.55 (1.55) | 0.76 (0.42, 1.31) | 0.34 |
| Azelate-C9-Dc | 1.09 (0.44) | 1.25 (0.80) | 0.76 (0.40, 1.30) | 0.34 |
| Gamma-Glutamylphenylalanine | 1.08 (0.39) | 1.00 (0.43) | 1.32 (0.75, 2.40) | 0.34 |
| N-Acetylglutamate | 1.62 (3.50) | 0.97 (0.83) | 1.67 (0.84, 9.08) | 0.34 |
| Serine | 1.03 (0.22) | 0.98 (0.23) | 1.30 (0.76, 2.26) | 0.34 |
| Gamma-Glutamyl-Epsilon-Lysine | 1.17 (0.56) | 1.04 (0.39) | 1.30 (0.76, 2.31) | 0.34 |
| N-Formylmethionine | 1.16 (0.81) | 1.05 (0.22) | 1.38 (0.76, 3.47) | 0.35 |
| Pregnenediol-Sulfate-C21h34o5s* | 1.21 (0.95) | 1.10 (0.73) | 1.34 (0.74, 2.60) | 0.35 |
| Fructosyllysine | 1.15 (0.50) | 1.34 (0.73) | 0.75 (0.39, 1.34) | 0.35 |
| Hexanoylglutamine | 1.29 (1.16) | 1.60 (1.99) | 0.76 (0.39, 1.32) | 0.35 |
| Edta | 0.92 (0.34) | 1.00 (0.28) | 0.78 (0.44, 1.31) | 0.35 |
| Metoprolol | 0.20 (0.43) | 0.57 (1.75) | 0.71 (0.23, 1.28) | 0.35 |
| Lisinopril | 0.62 (0.99) | 0.41 (0.58) | 1.41 (0.74, 3.42) | 0.35 |
| Laurylcarnitine-C12 | 1.35 (0.87) | 1.14 (0.67) | 1.35 (0.74, 2.64) | 0.35 |
| N-Acetylmethionine | 1.59 (2.71) | 1.18 (0.45) | 1.50 (0.79, 7.23) | 0.35 |
| Octadecanedioate-C18 | 1.11 (0.47) | 1.21 (0.67) | 0.77 (0.43, 1.33) | 0.35 |
| Histidine | 0.97 (0.21) | 0.94 (0.23) | 1.31 (0.74, 2.40) | 0.35 |
| 3-Carboxy-4-Methyl-5-Propyl-2-Furanpropanoate-Cmpf | 2.97 (4.57) | 2.05 (2.64) | 1.34 (0.75, 2.74) | 0.35 |
| 2-Methoxyacetaminophen-Glucuronide* | 1.08 (2.08) | 1.69 (4.05) | 0.74 (0.36, 1.36) | 0.36 |
| 3-Methylhistidine | 1.49 (1.57) | 1.25 (1.18) | 1.34 (0.73, 2.61) | 0.36 |
| L-Urobilin | 0.25 (0.19) | 1.60 (6.19) | 0.06 (0.00, 1.00) | 0.36 |
| N4-Acetylcytidine | 1.07 (0.70) | 1.23 (0.88) | 0.76 (0.41, 1.32) | 0.36 |
| 3-Hydroxy-3-Methylglutarate | 1.14 (0.50) | 1.31 (0.78) | 0.74 (0.36, 1.33) | 0.36 |
| N-Acetylglycine | 1.09 (0.57) | 0.94 (0.52) | 1.31 (0.74, 2.38) | 0.36 |
| Vanillylmandelate-Vma | 0.91 (0.60) | 0.97 (0.48) | 0.75 (0.39, 1.36) | 0.36 |
| Homostachydrine* | 1.13 (0.66) | 1.54 (2.44) | 0.69 (0.21, 1.25) | 0.36 |
| Stearoylcarnitine-C18 | 1.25 (0.58) | 1.11 (0.61) | 1.32 (0.74, 2.49) | 0.36 |
| 5alpha-Androstan-3alpha-17beta-Diol-Monosulfate-2 | 0.73 (0.89) | 0.72 (0.95) | 1.36 (0.70, 2.77) | 0.36 |
| Genistein-Sulfate* | 1.81 (5.99) | 0.73 (1.30) | 1.70 (0.84, 10.49) | 0.36 |
| Glycochenodeoxycholate-Glucuronide-1 | 1.34 (1.00) | 1.21 (0.87) | 1.29 (0.75, 2.32) | 0.37 |
| S-Methylcysteine | 1.19 (0.69) | 1.01 (0.46) | 1.30 (0.75, 2.41) | 0.37 |
| 1-Carboxyethylleucine | 0.93 (0.63) | 1.16 (0.80) | 0.75 (0.39, 1.37) | 0.37 |
| 2-Hydroxyglutarate | 0.77 (0.36) | 0.88 (0.41) | 0.76 (0.40, 1.37) | 0.37 |
| 3-Hydroxyhippurate-Sulfate | 1.48 (2.39) | 2.23 (4.45) | 0.76 (0.37, 1.33) | 0.37 |
| Uridine | 1.05 (0.29) | 0.98 (0.26) | 1.30 (0.73, 2.36) | 0.37 |
| Dibutyl-Sulfosuccinate | 2.99 (7.49) | 5.27 (8.88) | 0.76 (0.37, 1.33) | 0.37 |
| Glyco-Beta-Muricholate | 1.42 (2.46) | 0.90 (1.05) | 1.42 (0.77, 3.88) | 0.37 |
| Beta-Citrylglutamate | 1.25 (0.67) | 1.35 (0.60) | 0.76 (0.40, 1.35) | 0.37 |
| N-N-N-Trimethyl-5-Aminovalerate | 1.11 (0.53) | 1.29 (1.44) | 0.76 (0.36, 1.36) | 0.38 |
| Lysine | 0.97 (0.18) | 0.92 (0.28) | 1.29 (0.74, 2.29) | 0.38 |
| Carotene-Diol-1 | 1.37 (1.16) | 1.10 (0.76) | 1.33 (0.72, 2.63) | 0.38 |
| 4-Hydroxychlorothalonil | 1.23 (0.57) | 1.09 (0.51) | 1.29 (0.74, 2.32) | 0.38 |
| Tiglyl-Carnitine-C5 | 1.35 (0.91) | 1.20 (0.90) | 1.32 (0.72, 2.56) | 0.38 |
| Perfluorooctanesulfonate-Pfos | 1.50 (1.19) | 1.32 (0.92) | 1.28 (0.74, 2.31) | 0.38 |
| Amp | 2.32 (4.90) | 1.45 (0.97) | 1.39 (0.77, 5.09) | 0.38 |
| Isovalerate-C5 | 1.33 (0.88) | 1.25 (0.88) | 1.34 (0.70, 2.68) | 0.38 |
| N-Acetylalliin | 0.69 (0.94) | 0.99 (1.64) | 0.73 (0.33, 1.43) | 0.39 |
| Linoleoyl-Ethanolamide | 0.87 (0.52) | 0.97 (0.67) | 0.78 (0.44, 1.34) | 0.39 |
| Linoleoylcholine* | 1.50 (1.24) | 1.93 (2.87) | 0.74 (0.32, 1.33) | 0.39 |
| Undecanedioate-C11-Dc | 1.05 (0.26) | 1.14 (0.45) | 0.78 (0.41, 1.34) | 0.39 |
| 3-Hydroxyhexanoate | 1.20 (0.49) | 1.30 (0.65) | 0.79 (0.44, 1.34) | 0.39 |
| 2-Hydroxyphenylacetate | 1.12 (0.64) | 1.02 (0.56) | 1.28 (0.74, 2.30) | 0.39 |
| Octadecenedioate-C18-1-Dc | 1.10 (0.49) | 1.18 (0.63) | 0.77 (0.41, 1.35) | 0.39 |
| Norcotinine | 0.86 (0.05) | 0.89 (0.19) | 0.73 (0.19, 1.32) | 0.39 |
| Pimeloylcarnitine-3-Methyladipoylcarnitine-C7-Dc | 1.48 (3.07) | 0.85 (0.98) | 1.53 (0.77, 6.33) | 0.39 |
| Benzoate | 1.04 (0.34) | 1.08 (0.32) | 0.78 (0.41, 1.37) | 0.39 |
| Guaiacol-Sulfate | 1.49 (1.57) | 1.27 (1.30) | 1.33 (0.72, 2.77) | 0.39 |
| Valerate-5-0 | 0.94 (0.36) | 1.14 (1.13) | 0.70 (0.24, 1.44) | 0.40 |
| Adrenoylcarnitine-C22-4* | 1.27 (2.74) | 0.83 (0.55) | 1.63 (0.82, 13.09) | 0.40 |
| 2-6-Dihydroxybenzoic-Acid | 1.98 (2.01) | 1.51 (1.34) | 1.27 (0.73, 2.31) | 0.40 |
| 2-Hydroxyoctanoate | 1.15 (0.62) | 1.25 (0.80) | 0.78 (0.43, 1.36) | 0.40 |
| 4-Hydroxyphenylacetylglutamine | 1.19 (0.89) | 1.46 (1.15) | 0.78 (0.43, 1.36) | 0.40 |
| 5alpha-Androstan-3alpha-17beta-Diol-Disulfate | 0.65 (0.79) | 1.05 (1.45) | 0.75 (0.35, 1.40) | 0.40 |
| 5-Galactosylhydroxy-L-Lysine | 1.36 (1.32) | 1.10 (0.51) | 1.38 (0.73, 3.63) | 0.40 |
| N-1-N-8-Acetylspermidine | 1.07 (0.51) | 1.17 (0.42) | 0.78 (0.40, 1.36) | 0.40 |
| Cys-Gly-Oxidized | 1.37 (1.42) | 1.15 (0.65) | 1.30 (0.74, 3.09) | 0.40 |
| 4-Acetamidobutanoate | 1.27 (1.09) | 1.43 (1.24) | 0.77 (0.39, 1.40) | 0.41 |
| 5-Acetylamino-6-Formylamino-3-Methyluracil | 1.83 (2.02) | 2.17 (2.34) | 0.79 (0.44, 1.36) | 0.41 |
| Hydroxyproline | 1.19 (0.96) | 1.04 (0.49) | 1.36 (0.75, 3.30) | 0.41 |
| 10-Undecenoate-11-1n1 | 1.13 (0.60) | 0.99 (0.55) | 1.26 (0.74, 2.20) | 0.41 |
| Cis-Urocanate | 1.21 (0.78) | 1.07 (0.67) | 1.26 (0.73, 2.22) | 0.41 |
| O-Sulfo-L-Tyrosine | 1.24 (0.74) | 1.10 (0.46) | 1.31 (0.72, 2.73) | 0.41 |
| Arabinose | 0.83 (0.58) | 0.94 (0.53) | 0.79 (0.43, 1.36) | 0.41 |
| Octadecenedioylcarnitine-C18-1-Dc* | 1.38 (0.83) | 1.54 (1.30) | 0.79 (0.43, 1.37) | 0.41 |
| O-Cresol-Sulfate | 1.30 (2.07) | 1.03 (1.16) | 1.26 (0.73, 2.38) | 0.42 |
| Cysteine | 1.00 (0.20) | 0.97 (0.28) | 1.29 (0.70, 2.47) | 0.42 |
| Etiocholanolone-Glucuronide | 1.42 (1.49) | 1.28 (1.18) | 1.27 (0.72, 2.35) | 0.42 |
| 2-Methylbutyrylcarnitine-C5 | 1.14 (0.68) | 1.05 (0.61) | 1.26 (0.72, 2.28) | 0.42 |
| Cis-4-Decenoate-10-1n6* | 1.34 (0.88) | 1.09 (1.03) | 1.27 (0.71, 2.38) | 0.42 |
| Stearate-18-0 | 1.02 (0.37) | 1.09 (0.47) | 0.80 (0.46, 1.36) | 0.42 |
| N-Acetyl-3-Methylhistidine* | 1.34 (2.65) | 0.94 (1.42) | 1.34 (0.71, 3.33) | 0.42 |
| Fluconazole | 9.76 (52.90) | 39.51 (222.77) | 0.75 (0.19, 1.35) | 0.43 |
| Hydroxycotinine | 0.41 (0.41) | 0.52 (0.61) | 0.80 (0.42, 1.37) | 0.43 |
| Glycodeoxycholate-3-Sulfate | 1.32 (1.22) | 1.14 (1.25) | 1.26 (0.72, 2.31) | 0.43 |
| Linoleoylcarnitine-C18-2* | 1.70 (3.00) | 1.06 (0.42) | 3.07 (0.87, 58.11) | 0.43 |
| Daidzein-Sulfate-2 | 0.69 (1.37) | 0.55 (0.83) | 1.26 (0.72, 2.45) | 0.43 |
| 1-Methylhistidine | 1.12 (0.81) | 0.98 (0.51) | 1.28 (0.71, 2.58) | 0.43 |
| N2-N5-Diacetylornithine | 1.18 (0.98) | 1.43 (2.46) | 0.78 (0.34, 1.40) | 0.43 |
| Oleoylcholine | 1.47 (1.26) | 1.76 (2.20) | 0.79 (0.42, 1.38) | 0.43 |
| Glycodeoxycholate-Glucuronide-1 | 0.88 (0.83) | 0.76 (0.90) | 1.24 (0.73, 2.19) | 0.43 |
| Eicosenoate-20-1n9-Or-1n11 | 1.26 (0.86) | 1.43 (1.13) | 0.80 (0.44, 1.36) | 0.43 |
| Glycolithocholate | 0.72 (0.83) | 0.59 (0.50) | 1.26 (0.72, 2.40) | 0.43 |
| 2-Hydroxysebacate | 1.13 (0.69) | 1.25 (0.80) | 0.79 (0.43, 1.41) | 0.44 |
| Glycine | 1.11 (0.47) | 0.99 (0.41) | 1.26 (0.71, 2.35) | 0.44 |
| Behenate-22-0* | 1.32 (1.44) | 2.14 (4.14) | 0.73 (0.22, 1.37) | 0.44 |
| Cholate | 3.05 (6.98) | 2.20 (3.82) | 1.25 (0.71, 2.35) | 0.44 |
| Vanillic-Alcohol-Sulfate | 1.86 (5.59) | 2.96 (5.43) | 0.80 (0.41, 1.38) | 0.44 |
| 4-Cholesten-3-One | 0.99 (0.39) | 1.17 (0.99) | 0.76 (0.31, 1.36) | 0.44 |
| Ethyl-Alpha-Glucopyranoside | 0.88 (1.30) | 1.22 (2.17) | 0.79 (0.39, 1.40) | 0.44 |
| 9-Hydroxystearate | 1.12 (0.76) | 1.26 (1.20) | 0.81 (0.44, 1.37) | 0.44 |
| Kynurenate | 1.33 (1.02) | 1.18 (0.73) | 1.26 (0.71, 2.37) | 0.44 |
| Nonadecanoate-19-0 | 1.01 (0.32) | 1.07 (0.38) | 0.81 (0.47, 1.38) | 0.45 |
| 3-Methoxycatechol-Sulfate-1 | 2.55 (3.55) | 1.77 (3.28) | 1.25 (0.72, 2.48) | 0.45 |
| 1-Oleoyl-Gpg-18-1* | 0.81 (0.40) | 0.90 (0.43) | 0.80 (0.44, 1.41) | 0.45 |
| 5-Dodecenoylcarnitine-C12-1 | 1.18 (1.09) | 0.93 (0.89) | 1.25 (0.71, 2.33) | 0.45 |
| Phosphate | 0.98 (0.35) | 1.01 (0.18) | 0.81 (0.44, 1.39) | 0.45 |
| Gamma-Glutamylleucine | 1.09 (0.37) | 1.05 (0.48) | 1.26 (0.70, 2.35) | 0.45 |
| Tetradecanedioate-C14 | 1.36 (0.78) | 1.20 (0.71) | 1.23 (0.72, 2.18) | 0.45 |
| 2-Hydroxyhippurate-Salicylurate | 24.26 (71.70) | 17.10 (46.24) | 1.24 (0.71, 2.43) | 0.45 |
| 4-Guanidinobutanoate | 0.82 (0.74) | 1.12 (1.65) | 0.77 (0.34, 1.42) | 0.46 |
| Octadecadienedioate-C18-2-Dc* | 1.40 (1.02) | 1.50 (2.17) | 0.78 (0.35, 1.48) | 0.46 |
| Linolenoylcarnitine-C18-3* | 1.99 (5.70) | 0.82 (0.57) | 4.70 (0.83, 317.09) | 0.46 |
| Phenylacetylglutamate | 0.85 (0.62) | 0.96 (0.78) | 0.81 (0.46, 1.39) | 0.46 |
| 3-Hydroxysebacate | 1.23 (1.16) | 1.47 (1.67) | 0.81 (0.43, 1.41) | 0.46 |
| Glycohyocholate | 1.49 (2.44) | 1.20 (1.17) | 1.25 (0.71, 2.52) | 0.46 |
| Glycerophosphorylcholine-Gpc | 1.10 (0.43) | 1.02 (0.40) | 1.24 (0.70, 2.23) | 0.47 |
| Hyocholate | 1.40 (1.58) | 1.19 (1.22) | 1.24 (0.70, 2.42) | 0.47 |
| Pyroglutamine* | 1.13 (0.82) | 1.09 (0.70) | 1.24 (0.69, 2.26) | 0.47 |
| Sphinganine | 1.85 (2.43) | 1.50 (0.99) | 1.23 (0.71, 2.58) | 0.48 |
| N-2-Furoyl-Glycine | 2.67 (3.01) | 2.56 (4.73) | 1.30 (0.63, 2.77) | 0.48 |
| Palmitoylcholine | 1.43 (1.13) | 1.68 (2.09) | 0.81 (0.41, 1.41) | 0.48 |
| 5alpha-Androstan-3beta-17alpha-Diol-Disulfate | 1.79 (3.92) | 1.57 (2.75) | 1.23 (0.69, 2.35) | 0.48 |
| Arachidonoylcholine | 1.38 (1.09) | 1.60 (1.93) | 0.82 (0.45, 1.41) | 0.48 |
| 4-Hydroxyhippurate | 1.65 (1.31) | 1.88 (1.48) | 0.83 (0.47, 1.39) | 0.48 |
| Indolelactate | 1.24 (0.60) | 1.18 (0.68) | 1.23 (0.69, 2.29) | 0.48 |
| Proline | 1.01 (0.24) | 1.07 (0.38) | 0.82 (0.45, 1.42) | 0.48 |
| 1-2-3-Benzenetriol-Sulfate-2 | 2.09 (4.25) | 1.57 (2.28) | 1.22 (0.70, 2.38) | 0.48 |
| Maltotriose | 1.12 (1.10) | 1.22 (0.93) | 0.82 (0.46, 1.41) | 0.48 |
| Lithocholate-Sulfate-1 | 2.25 (3.15) | 1.80 (3.22) | 1.22 (0.70, 2.23) | 0.48 |
| 2-3-Dihydroxyisovalerate | 2.90 (3.57) | 3.72 (9.05) | 0.81 (0.40, 1.45) | 0.48 |
| Thc-Carboxylic-Acid | 0.18 (0.33) | 0.38 (1.26) | 0.74 (0.18, 1.37) | 0.49 |
| Beta-Hydroxyisovalerate | 1.13 (0.70) | 1.33 (0.88) | 0.81 (0.42, 1.44) | 0.49 |
| Hexadecenedioate-C16-1-Dc* | 1.28 (0.72) | 1.16 (0.65) | 1.21 (0.70, 2.13) | 0.49 |
| Sulfate-Of-Piperine-Metabolite-C18h21no3-1* | 1.23 (1.66) | 1.08 (1.19) | 1.21 (0.70, 2.14) | 0.49 |
| Hypotaurine | 1.30 (0.94) | 1.19 (0.90) | 1.22 (0.69, 2.20) | 0.49 |
| Gamma-Glutamylglutamine | 1.07 (0.36) | 1.00 (0.36) | 1.24 (0.68, 2.29) | 0.49 |
| Cortisone | 0.97 (0.27) | 1.01 (0.37) | 0.83 (0.47, 1.42) | 0.49 |
| Sulfate* | 1.12 (0.42) | 1.05 (0.34) | 1.23 (0.69, 2.32) | 0.49 |
| Glycerate | 1.02 (0.39) | 1.07 (0.56) | 0.82 (0.44, 1.44) | 0.49 |
| N-Acetyltaurine | 1.21 (0.77) | 1.36 (0.78) | 0.82 (0.44, 1.44) | 0.49 |
| Glycochenodeoxycholate | 1.40 (1.68) | 1.25 (1.03) | 1.23 (0.70, 2.41) | 0.50 |
| 4-Methylcatechol-Sulfate | 1.42 (1.14) | 1.62 (1.46) | 0.81 (0.43, 1.46) | 0.50 |
| N-Acetyl-Beta-Alanine | 0.97 (0.43) | 1.03 (0.40) | 0.82 (0.45, 1.43) | 0.50 |
| Homovanillate-Hva | 1.10 (0.90) | 0.94 (0.46) | 1.26 (0.67, 2.66) | 0.50 |
| Sulfate-Of-Piperine-Metabolite-C18h21no3-3* | 1.11 (1.30) | 0.99 (0.96) | 1.21 (0.69, 2.14) | 0.50 |
| Methionine-Sulfone | 1.09 (0.57) | 1.13 (0.61) | 0.82 (0.45, 1.46) | 0.50 |
| Docosadienoate-22-2n6 | 1.09 (0.57) | 1.17 (0.73) | 0.83 (0.46, 1.41) | 0.50 |
| Isobutyrylglycine-C4 | 1.20 (0.55) | 1.09 (0.65) | 1.20 (0.71, 2.11) | 0.50 |
| Tridecenedioate-C13-1-Dc* | 1.33 (0.88) | 1.16 (0.84) | 1.21 (0.70, 2.15) | 0.50 |
| Glucuronide-Of-Piperine-Metabolite-C17h21no3-3* | 1.21 (1.46) | 1.60 (2.90) | 0.79 (0.35, 1.54) | 0.51 |
| 7-Hoca | 1.05 (0.31) | 0.99 (0.32) | 1.20 (0.70, 2.11) | 0.51 |
| 3-Hydroxystearate | 0.76 (0.46) | 0.84 (0.59) | 0.83 (0.46, 1.42) | 0.51 |
| Cytidine | 0.99 (0.83) | 0.85 (0.54) | 1.20 (0.70, 2.18) | 0.51 |
| 4-Methyl-2-Oxopentanoate | 1.05 (0.38) | 1.03 (0.37) | 1.22 (0.68, 2.24) | 0.51 |
| Dopamine-4-Sulfate | 1.31 (3.88) | 0.75 (0.98) | 1.27 (0.69, 3.74) | 0.51 |
| Gamma-Glutamyltyrosine | 1.15 (0.46) | 1.07 (0.61) | 1.21 (0.69, 2.17) | 0.51 |
| Cystine | 1.24 (0.67) | 1.13 (0.52) | 1.22 (0.68, 2.23) | 0.51 |
| Behenoylcarnitine-C22* | 0.90 (0.47) | 0.82 (0.60) | 1.19 (0.70, 2.07) | 0.52 |
| 4-Allylcatechol-Sulfate | 2.67 (6.61) | 1.63 (2.42) | 1.26 (0.66, 3.07) | 0.52 |
| Gamma-Tocopherol-Beta-Tocopherol | 1.04 (0.45) | 1.13 (0.59) | 0.82 (0.45, 1.48) | 0.52 |
| 3-Methylxanthine | 1.40 (1.01) | 1.53 (1.86) | 0.83 (0.45, 1.46) | 0.52 |
| 3-Hydroxybutyroylglycine | 1.09 (0.81) | 0.91 (0.54) | 1.21 (0.68, 2.27) | 0.52 |
| Fluoxetine | 0.14 (0.52) | 0.06 (0.19) | 1.26 (0.71, 3.80) | 0.52 |
| 3-Cystein-S-Yl-Acetaminophen* | 0.39 (0.65) | 0.50 (0.97) | 0.82 (0.43, 1.49) | 0.52 |
| Alpha-Tocopherol | 1.04 (0.20) | 0.99 (0.23) | 1.21 (0.68, 2.19) | 0.52 |
| N1-Methylinosine | 1.11 (0.77) | 1.02 (0.58) | 1.22 (0.68, 2.36) | 0.52 |
| Carotene-Diol-2 | 1.40 (1.24) | 1.14 (0.79) | 1.23 (0.67, 2.45) | 0.52 |
| 7-Ketodeoxycholate | 0.66 (0.68) | 1.53 (4.56) | 0.58 (0.05, 1.30) | 0.52 |
| Methionine-Sulfoxide | 1.08 (0.42) | 1.21 (0.94) | 0.81 (0.38, 1.52) | 0.52 |
| Methylnaphthyl-Sulfate-2* | 0.42 (0.84) | 0.35 (0.44) | 1.20 (0.69, 2.23) | 0.52 |
| Stearoylcholine* | 1.36 (1.17) | 1.60 (2.29) | 0.83 (0.42, 1.44) | 0.52 |
| Ondansetron | 0.11 (0.33) | 0.18 (0.47) | 0.82 (0.38, 1.45) | 0.53 |
| N-Acetyl-Isoputreanine | 1.18 (0.71) | 1.06 (0.49) | 1.22 (0.67, 2.36) | 0.53 |
| Cotinine-N-Oxide | 0.49 (0.14) | 0.54 (0.30) | 0.81 (0.33, 1.47) | 0.53 |
| Pregnenetriol-Disulfate* | 1.20 (1.06) | 1.52 (1.48) | 0.83 (0.43, 1.45) | 0.53 |
| Ursodeoxycholate | 1.68 (4.29) | 1.29 (2.34) | 1.31 (0.60, 3.82) | 0.53 |
| Isocitric-Lactone | 0.98 (0.89) | 1.07 (0.79) | 0.83 (0.44, 1.51) | 0.53 |
| N-Acetyltheanine | 0.70 (1.77) | 0.85 (1.78) | 0.84 (0.44, 1.47) | 0.53 |
| 4-Acetaminophen-Sulfate | 4.45 (7.80) | 3.26 (6.96) | 1.20 (0.68, 2.18) | 0.53 |
| Phenyllactate-Pla | 1.18 (0.61) | 1.53 (2.45) | 0.80 (0.24, 1.42) | 0.54 |
| Caprate-10-0 | 1.68 (1.74) | 1.53 (0.94) | 1.19 (0.69, 2.12) | 0.54 |
| 4-Methylguaiacol-Sulfate | 1.41 (1.88) | 1.69 (1.63) | 0.83 (0.45, 1.48) | 0.54 |
| 3-Hydroxydodecanedioate* | 0.90 (0.72) | 1.01 (1.09) | 0.84 (0.45, 1.47) | 0.54 |
| N2-N2-Dimethylguanosine | 1.05 (0.47) | 1.10 (0.34) | 0.84 (0.46, 1.49) | 0.54 |
| 2-Hydroxyacetaminophen-Sulfate* | 2.55 (4.53) | 1.86 (4.24) | 1.19 (0.67, 2.17) | 0.55 |
| Pantoprazole | 0.05 (0.24) | 0.02 (0.12) | 1.20 (0.66, 2.60) | 0.55 |
| 3-Methyl-2-Oxobutyrate | 1.04 (0.30) | 1.01 (0.24) | 1.18 (0.68, 2.11) | 0.55 |
| 5-Oxoproline | 1.12 (0.73) | 1.04 (0.36) | 1.19 (0.67, 2.37) | 0.55 |
| Linolenate-18-3n3-Or-3n6 | 1.22 (1.36) | 1.34 (1.33) | 0.85 (0.47, 1.45) | 0.55 |
| Deoxycholic-Acid-12-Or-24-Sulfate* | 1.43 (1.34) | 1.33 (1.55) | 1.20 (0.65, 2.26) | 0.55 |
| 1-Stearoyl-Gps-18-0* | 0.20 (0.16) | 0.23 (0.34) | 0.84 (0.36, 1.50) | 0.55 |
| Phosphoethanolamine-Pe | 1.25 (0.78) | 1.30 (0.71) | 0.84 (0.45, 1.46) | 0.55 |
| N-Acetylneuraminate | 1.28 (0.69) | 1.34 (0.60) | 0.85 (0.48, 1.47) | 0.55 |
| 3-Aminoisobutyrate | 1.02 (0.79) | 1.13 (0.78) | 0.84 (0.44, 1.50) | 0.55 |
| Glutamine-Conjugate-Of-C6h10o2-2* | 1.53 (2.23) | 1.72 (2.04) | 0.85 (0.47, 1.47) | 0.56 |
| Alpha-Cehc | 0.60 (0.66) | 0.71 (1.28) | 0.83 (0.38, 1.49) | 0.56 |
| Phenylacetylcarnitine | 1.14 (1.06) | 1.11 (1.15) | 1.19 (0.66, 2.17) | 0.56 |
| Arabitol-Xylitol | 1.12 (0.59) | 1.04 (0.39) | 1.20 (0.66, 2.33) | 0.56 |
| 2-Hydroxynervonate* | 1.00 (0.35) | 1.07 (0.45) | 0.85 (0.49, 1.46) | 0.56 |
| 9-10-Dihome | 1.45 (1.24) | 1.30 (1.01) | 1.18 (0.67, 2.17) | 0.56 |
| Creatine | 1.12 (0.70) | 1.20 (0.82) | 0.85 (0.47, 1.48) | 0.56 |
| Glycochenodeoxycholate-3-Sulfate | 1.57 (1.67) | 1.50 (1.18) | 1.19 (0.65, 2.28) | 0.56 |
| 2-Butenoylglycine | 1.08 (1.01) | 0.87 (0.61) | 1.18 (0.67, 2.20) | 0.57 |
| Glutamine-Conjugate-Of-C7h12o2* | 1.39 (2.23) | 1.55 (2.16) | 0.85 (0.46, 1.48) | 0.57 |
| 2-3-Dihydroxypyridine | 0.87 (0.61) | 0.87 (1.30) | 1.23 (0.60, 2.62) | 0.57 |
| Beta-Cryptoxanthin | 1.51 (1.68) | 1.78 (4.84) | 0.84 (0.37, 1.55) | 0.57 |
| 3-Decenoylcarnitine | 0.86 (0.60) | 0.75 (0.48) | 1.18 (0.67, 2.14) | 0.57 |
| Succinylcarnitine-C4-Dc | 1.14 (0.72) | 1.05 (0.46) | 1.18 (0.68, 2.19) | 0.57 |
| Succinate | 1.05 (0.77) | 1.11 (0.42) | 0.85 (0.43, 1.47) | 0.57 |
| Asparagine | 0.99 (0.19) | 1.02 (0.24) | 0.86 (0.48, 1.47) | 0.57 |
| Androstenediol-3beta-17beta-Monosulfate-2 | 1.10 (0.73) | 0.99 (0.67) | 1.17 (0.67, 2.07) | 0.57 |
| 16-Or-17-Methylstearate-A19-0-Or-I19-0 | 1.04 (0.46) | 1.09 (0.57) | 0.85 (0.48, 1.48) | 0.58 |
| Homocitrulline | 1.12 (1.23) | 0.96 (0.71) | 1.18 (0.67, 2.23) | 0.58 |
| 2'-O-Methylcytidine | 0.92 (0.35) | 0.97 (0.45) | 0.86 (0.49, 1.45) | 0.58 |
| Quinate | 1.42 (1.40) | 1.26 (1.67) | 1.18 (0.66, 2.22) | 0.58 |
| Tauroursodeoxycholate | 1.44 (2.01) | 2.24 (5.65) | 0.82 (0.28, 1.51) | 0.59 |
| N-Acetyl-2-Aminooctanoate* | 1.29 (0.78) | 1.19 (0.74) | 1.16 (0.67, 2.05) | 0.59 |
| Trans-2-Hexenoylglycine | 1.11 (1.39) | 0.86 (0.62) | 1.19 (0.67, 2.53) | 0.59 |
| Dopamine-3-O-Sulfate | 2.31 (5.57) | 1.66 (1.70) | 1.19 (0.67, 3.11) | 0.59 |
| Trigonelline-N'-Methylnicotinate | 1.34 (1.17) | 1.28 (0.98) | 1.17 (0.66, 2.11) | 0.59 |
| Linoleate-18-2n6 | 1.28 (1.20) | 1.39 (1.26) | 0.86 (0.49, 1.47) | 0.59 |
| N6-Methyladenosine | 0.71 (0.33) | 0.66 (0.33) | 1.16 (0.67, 2.02) | 0.59 |
| Tartarate | 0.97 (2.28) | 1.39 (2.51) | 0.86 (0.46, 1.48) | 0.59 |
| Erucate-22-1n9 | 1.19 (0.78) | 1.27 (0.65) | 0.86 (0.47, 1.48) | 0.59 |
| Palmitoyl-Ethanolamide | 1.01 (0.24) | 1.03 (0.29) | 0.86 (0.48, 1.50) | 0.60 |
| P-Cresol-Glucuronide* | 1.31 (1.56) | 1.70 (3.08) | 0.84 (0.38, 1.57) | 0.60 |
| Adsgegdfxaegggvr* | 0.42 (0.02) | 0.43 (0.10) | 0.83 (0.23, 1.49) | 0.60 |
| Dihomolinoleate-20-2n6 | 1.14 (0.76) | 1.23 (1.02) | 0.86 (0.47, 1.47) | 0.60 |
| Glycerophosphoethanolamine | 1.08 (0.37) | 1.03 (0.29) | 1.15 (0.67, 2.03) | 0.60 |
| Omeprazole | 1.59 (4.90) | 0.79 (2.53) | 1.17 (0.67, 2.46) | 0.60 |
| 3-3-Amino-3-Carboxypropyl-Uridine* | 1.25 (0.95) | 1.14 (0.39) | 1.18 (0.66, 2.56) | 0.60 |
| Caffeic-Acid-Sulfate | 1.18 (1.45) | 1.03 (1.62) | 1.17 (0.66, 2.19) | 0.60 |
| 3-Hydroxyoctanoate | 1.20 (0.54) | 1.31 (1.04) | 0.86 (0.48, 1.48) | 0.60 |
| 3-Ethylcatechol-Sulfate-1 | 1.20 (1.23) | 1.04 (1.36) | 1.16 (0.67, 2.11) | 0.60 |
| Galactonate | 1.26 (1.61) | 1.36 (1.65) | 0.86 (0.47, 1.54) | 0.61 |
| N-Acetylthreonine | 1.16 (0.58) | 1.12 (0.43) | 1.17 (0.64, 2.23) | 0.61 |
| Isoursodeoxycholate | 1.50 (1.54) | 1.67 (2.26) | 0.82 (0.36, 1.76) | 0.61 |
| Theobromine | 1.36 (1.04) | 1.64 (2.56) | 0.86 (0.42, 1.51) | 0.61 |
| Ribonate | 1.30 (1.54) | 1.13 (0.49) | 1.16 (0.67, 2.55) | 0.61 |
| 1-Ribosyl-Imidazoleacetate* | 1.33 (1.11) | 1.19 (0.79) | 1.15 (0.67, 2.08) | 0.61 |
| Myristate-14-0 | 1.31 (1.34) | 1.42 (1.14) | 0.87 (0.48, 1.49) | 0.62 |
| Glucuronide-Of-Piperine-Metabolite-C17h21no3-4* | 1.38 (1.43) | 1.69 (3.12) | 0.84 (0.38, 1.61) | 0.62 |
| S-Methylcysteine-Sulfoxide | 1.39 (1.17) | 1.17 (0.69) | 1.16 (0.66, 2.13) | 0.62 |
| 3-Methyl-2-Oxovalerate | 1.02 (0.30) | 1.08 (0.32) | 0.87 (0.48, 1.52) | 0.62 |
| Taurocholenate-Sulfate* | 1.77 (1.31) | 1.68 (1.71) | 1.15 (0.66, 2.07) | 0.62 |
| 2-3-Dihydroxy-5-Methylthio-4-Pentenoate-Dmtpa* | 1.13 (0.49) | 1.09 (0.44) | 1.17 (0.64, 2.24) | 0.62 |
| 2-Piperidinone | 2.56 (3.88) | 2.33 (3.63) | 1.14 (0.66, 2.02) | 0.62 |
| Pregnanediol-3-Glucuronide | 1.54 (1.76) | 1.35 (1.57) | 1.15 (0.66, 2.03) | 0.62 |
| Pantoate | 2.55 (7.03) | 2.89 (6.47) | 0.87 (0.45, 1.57) | 0.63 |
| 2-Hydroxyibuprofen | 0.07 (0.18) | 2.96 (11.44) | 0.00 (0.00, 0.28) | 0.63 |
| 2-Methylcitrate-Homocitrate | 1.00 (0.87) | 0.90 (0.74) | 1.14 (0.67, 2.00) | 0.63 |
| 1-7-Dimethylurate | 1.19 (0.77) | 1.23 (0.97) | 0.87 (0.48, 1.53) | 0.63 |
| N-N-Dimethylalanine | 1.24 (1.12) | 1.10 (0.51) | 1.15 (0.66, 2.13) | 0.63 |
| 4-Hydroxycoumarin | 1.15 (1.84) | 1.32 (2.93) | 0.87 (0.44, 1.56) | 0.63 |
| Theanine | 2.19 (8.61) | 2.55 (8.45) | 0.87 (0.46, 1.56) | 0.63 |
| Gamma-Glutamyltryptophan | 1.05 (0.32) | 1.00 (0.36) | 1.14 (0.66, 2.01) | 0.63 |
| Acesulfame | 3.33 (6.13) | 2.50 (5.49) | 1.15 (0.64, 2.13) | 0.63 |
| Phenol-Sulfate | 1.14 (0.66) | 1.03 (0.79) | 1.15 (0.66, 2.06) | 0.63 |
| Pyrraline | 1.21 (1.43) | 1.17 (0.82) | 1.16 (0.63, 2.14) | 0.64 |
| N-Acetyltryptophan | 1.05 (0.31) | 1.02 (0.39) | 1.15 (0.65, 2.05) | 0.64 |
| N6-Methyllysine | 1.61 (1.30) | 1.45 (1.11) | 1.14 (0.67, 1.99) | 0.64 |
| Methylmalonate-Mma | 1.14 (0.47) | 1.17 (0.68) | 0.88 (0.48, 1.52) | 0.64 |
| 2-Aminoheptanoate | 1.06 (0.43) | 1.09 (0.45) | 0.88 (0.50, 1.52) | 0.64 |
| Oleate-Vaccenate-18-1 | 1.31 (1.07) | 1.38 (1.17) | 0.88 (0.50, 1.50) | 0.64 |
| Indoleacetylglutamine | 0.90 (1.06) | 0.84 (0.85) | 1.14 (0.63, 2.15) | 0.64 |
| Methyl-4-Hydroxybenzoate-Sulfate | 4.31 (9.34) | 3.50 (5.19) | 1.15 (0.64, 2.13) | 0.64 |
| S-3-Hydroxybutyrylcarnitine | 1.22 (1.06) | 1.31 (0.88) | 0.87 (0.48, 1.56) | 0.64 |
| 5-Dodecenoate-12-1n7 | 1.41 (1.02) | 1.43 (1.81) | 0.88 (0.47, 1.56) | 0.64 |
| Tetradecadienoate-14-2* | 1.32 (0.75) | 1.15 (1.01) | 1.15 (0.63, 2.19) | 0.65 |
| Caffeine | 1.31 (0.91) | 1.27 (1.64) | 1.15 (0.62, 2.17) | 0.65 |
| Docosahexaenoate-Dha-22-6n3 | 1.43 (1.09) | 1.25 (0.94) | 1.14 (0.65, 2.02) | 0.65 |
| Tamsulosin | 0.45 (0.16) | 0.52 (0.55) | 0.87 (0.33, 1.53) | 0.65 |
| 5alpha-Pregnan-3beta-20alpha-Diol-Disulfate | 1.52 (1.49) | 1.85 (2.74) | 0.88 (0.48, 1.52) | 0.65 |
| Branched-Chain-14-0-Dicarboxylic-Acid | 1.25 (1.51) | 1.45 (1.35) | 0.88 (0.49, 1.53) | 0.65 |
| 10-Nonadecenoate-19-1n9 | 1.22 (0.85) | 1.28 (1.00) | 0.88 (0.50, 1.50) | 0.65 |
| 12-13-Dihome | 1.26 (0.76) | 1.17 (0.66) | 1.14 (0.65, 2.02) | 0.65 |
| Adenine | 0.91 (0.47) | 0.87 (0.42) | 1.13 (0.67, 1.92) | 0.65 |
| Branched-Chain-Straight-Chain-Or-Cyclopropyl-10-1-Fatty-Acid-1* | 1.17 (1.04) | 1.25 (0.83) | 0.89 (0.51, 1.50) | 0.66 |
| Methylsuccinate | 1.08 (0.48) | 1.04 (0.40) | 1.16 (0.61, 2.26) | 0.66 |
| N-Methylpipecolate | 1.64 (2.55) | 1.41 (1.37) | 1.14 (0.64, 2.33) | 0.66 |
| Mannonate* | 1.21 (0.57) | 1.27 (0.51) | 0.88 (0.49, 1.55) | 0.66 |
| Valsartan | 0.16 (0.55) | 0.10 (0.23) | 1.14 (0.66, 2.83) | 0.66 |
| Tyramine-O-Sulfate | 1.90 (5.24) | 2.62 (4.22) | 0.88 (0.44, 1.52) | 0.66 |
| 2-Or-3-Decenoate-10-1n7-Or-N8 | 0.92 (0.54) | 0.94 (0.75) | 0.88 (0.47, 1.59) | 0.67 |
| Palmitate-16-0 | 1.14 (0.66) | 1.19 (0.72) | 0.89 (0.51, 1.51) | 0.67 |
| Trans-Urocanate | 1.26 (0.73) | 1.18 (0.67) | 1.14 (0.64, 2.08) | 0.67 |
| 3-4-Hydroxyphenyl-Lactate-Hpla | 1.10 (0.48) | 1.09 (0.40) | 1.14 (0.63, 2.08) | 0.67 |
| Pyruvate | 1.11 (0.87) | 1.07 (0.26) | 1.12 (0.62, 2.22) | 0.67 |
| 1-Stearoyl-2-Arachidonoyl-Gps-18-0-20-4 | 0.91 (0.69) | 0.92 (0.61) | 0.89 (0.51, 1.53) | 0.67 |
| 3-Carboxy-4-Methyl-5-Pentyl-2-Furanpropionate-3-Cmpfp | 1.20 (0.75) | 1.10 (0.69) | 1.14 (0.61, 2.20) | 0.67 |
| Leucine | 1.05 (0.24) | 1.07 (0.38) | 1.15 (0.60, 2.22) | 0.67 |
| Methyl-Glucopyranoside-Alpha-Beta | 2.40 (7.36) | 2.91 (7.35) | 0.89 (0.45, 1.56) | 0.67 |
| Gamma-Glutamylglycine | 1.17 (0.59) | 1.04 (0.57) | 1.13 (0.63, 2.06) | 0.68 |
| Threonine | 0.98 (0.34) | 1.02 (0.41) | 0.89 (0.51, 1.53) | 0.68 |
| Dihydroorotate | 0.93 (0.68) | 0.94 (0.76) | 1.13 (0.64, 1.99) | 0.68 |
| Glucuronide-Of-Piperine-Metabolite-C17h21no3-5* | 1.50 (1.98) | 1.86 (3.65) | 0.87 (0.40, 1.69) | 0.68 |
| Nicotinamide | 0.94 (0.98) | 0.81 (0.68) | 1.12 (0.64, 2.03) | 0.68 |
| Eugenol-Sulfate | 2.00 (3.36) | 1.57 (3.62) | 1.13 (0.63, 2.13) | 0.68 |
| Dodecenedioate-C12-1-Dc* | 1.21 (0.76) | 1.24 (0.80) | 0.89 (0.50, 1.55) | 0.68 |
| Tauro-Beta-Muricholate | 1.18 (1.61) | 0.98 (1.62) | 1.12 (0.64, 2.05) | 0.68 |
| N6-N6-Dimethyllysine | 1.24 (1.02) | 1.15 (0.69) | 1.13 (0.63, 2.19) | 0.68 |
| Dihomo-Linolenoyl-Choline | 1.02 (1.09) | 1.15 (1.57) | 0.89 (0.48, 1.54) | 0.68 |
| Guaifenesin | 0.12 (0.43) | 0.19 (0.95) | 0.88 (0.37, 1.58) | 0.69 |
| Cerotoylcarnitine-C26* | 0.98 (0.25) | 0.96 (0.35) | 1.12 (0.65, 1.95) | 0.69 |
| Phenylacetate | 0.87 (0.45) | 0.97 (0.78) | 0.89 (0.49, 1.55) | 0.69 |
| Naproxen | 0.19 (0.56) | 0.28 (0.91) | 0.89 (0.45, 1.53) | 0.69 |
| Salicylate | 23.60 (70.34) | 21.29 (66.89) | 1.12 (0.63, 2.04) | 0.69 |
| Andro-Steroid-Monosulfate-C19h28o6s-1* | 1.16 (1.50) | 1.06 (1.00) | 1.11 (0.65, 1.99) | 0.70 |
| 5alpha-Androstan-3beta-17beta-Diol-Disulfate | 1.65 (1.96) | 1.78 (2.09) | 1.12 (0.62, 2.06) | 0.70 |
| 2-Oxoarginine* | 1.43 (1.32) | 1.38 (1.66) | 1.13 (0.60, 2.15) | 0.70 |
| Alpha-Cehc-Sulfate | 1.22 (1.90) | 1.36 (3.55) | 0.89 (0.44, 1.62) | 0.70 |
| 2s-3r-Dihydroxybutyrate | 1.14 (0.64) | 1.22 (0.66) | 0.89 (0.47, 1.64) | 0.70 |
| Palmitoleate-16-1n7 | 1.65 (1.94) | 1.75 (2.42) | 0.90 (0.49, 1.54) | 0.70 |
| Sebacate-C10-Dc | 1.29 (0.72) | 1.35 (1.12) | 0.90 (0.51, 1.56) | 0.70 |
| Docosahexaenoylcholine | 1.04 (0.80) | 1.12 (1.59) | 0.90 (0.47, 1.57) | 0.70 |
| 3-Methoxytyrosine | 1.03 (0.39) | 1.05 (0.36) | 0.90 (0.51, 1.56) | 0.70 |
| 4-Acetamidophenol | 1.82 (3.64) | 1.41 (3.59) | 1.11 (0.63, 2.02) | 0.70 |
| 2-Isopropylmalate | 2.38 (5.68) | 1.83 (3.82) | 1.11 (0.63, 2.04) | 0.70 |
| N-Acetylphenylalanine | 1.15 (0.47) | 1.15 (0.61) | 1.11 (0.64, 1.95) | 0.71 |
| Tartronate-Hydroxymalonate | 0.94 (0.56) | 0.95 (0.88) | 0.90 (0.50, 1.57) | 0.71 |
| N6-Acetyllysine | 1.02 (0.22) | 1.04 (0.28) | 0.89 (0.49, 1.62) | 0.71 |
| Pregnen-Diol-Disulfate* | 1.32 (1.39) | 1.57 (1.43) | 0.89 (0.47, 1.61) | 0.71 |
| Arachidonate-20-4n6 | 1.29 (1.00) | 1.19 (0.90) | 1.10 (0.65, 1.92) | 0.71 |
| Arachidoylcarnitine-C20* | 1.10 (0.44) | 1.04 (0.61) | 1.11 (0.63, 1.99) | 0.71 |
| 5-Acetylamino-6-Amino-3-Methyluracil | 1.97 (1.89) | 2.06 (2.11) | 0.90 (0.51, 1.58) | 0.72 |
| 3-Methylglutaconate | 1.61 (1.27) | 1.64 (2.11) | 0.90 (0.50, 1.62) | 0.72 |
| Sulfate-Of-Piperine-Metabolite-C16h19no3-3* | 1.19 (1.03) | 1.32 (1.32) | 0.90 (0.51, 1.57) | 0.72 |
| 2-Methoxyacetaminophen-Sulfate* | 0.41 (0.71) | 0.45 (1.04) | 0.90 (0.49, 1.61) | 0.72 |
| 16a-Hydroxy-Dhea-3-Sulfate | 1.53 (2.29) | 1.42 (1.33) | 1.10 (0.63, 2.01) | 0.72 |
| Taurocholate | 3.02 (7.28) | 4.43 (14.93) | 0.90 (0.39, 1.59) | 0.72 |
| Alpha-Ketoglutaramate* | 1.11 (0.51) | 1.07 (0.43) | 1.11 (0.62, 2.04) | 0.72 |
| Glycocholenate-Sulfate* | 1.09 (0.45) | 1.19 (0.77) | 0.91 (0.52, 1.57) | 0.72 |
| Adrenate-22-4n6 | 1.36 (1.44) | 1.48 (1.45) | 0.91 (0.50, 1.56) | 0.73 |
| Paraxanthine | 1.25 (0.87) | 1.17 (1.20) | 1.10 (0.63, 1.96) | 0.73 |
| Glycerophosphoinositol* | 1.34 (1.34) | 1.49 (1.25) | 0.90 (0.49, 1.58) | 0.73 |
| Thyroxine | 1.05 (0.21) | 1.05 (0.20) | 0.91 (0.52, 1.57) | 0.73 |
| Vanillate-Glucuronide | 0.67 (1.65) | 1.01 (3.53) | 0.89 (0.39, 1.69) | 0.73 |
| Kynurenine | 1.09 (0.40) | 1.06 (0.52) | 1.10 (0.63, 1.96) | 0.73 |
| 2-2'-Methylenebis-6-Tert-Butyl-P-Cresol | 1.44 (2.59) | 1.36 (1.66) | 1.11 (0.60, 2.10) | 0.73 |
| 1-3-Dimethylurate | 1.14 (0.79) | 1.19 (0.98) | 0.91 (0.52, 1.58) | 0.73 |
| Gamma-Glutamylmethionine | 0.99 (0.42) | 1.05 (0.55) | 0.91 (0.51, 1.59) | 0.74 |
| Glutamine-Conjugate-Of-C6h10o2-1* | 1.37 (1.43) | 1.42 (1.22) | 0.91 (0.52, 1.58) | 0.74 |
| 17alpha-Hydroxypregnanolone-Glucuronide | 1.01 (1.77) | 1.04 (1.41) | 1.10 (0.61, 1.99) | 0.74 |
| Acisoga | 1.12 (0.44) | 1.09 (0.49) | 1.10 (0.63, 1.92) | 0.74 |
| Taurodeoxycholate | 2.03 (3.24) | 2.87 (9.21) | 0.90 (0.37, 1.61) | 0.74 |
| Leukotriene-B5 | 0.96 (0.54) | 1.01 (0.63) | 0.91 (0.51, 1.61) | 0.74 |
| 3-Hydroxycotinine-Glucuronide | 0.43 (0.80) | 0.52 (0.85) | 0.91 (0.49, 1.57) | 0.74 |
| Ferulic-Acid-4-Sulfate | 1.11 (1.28) | 1.05 (1.00) | 1.10 (0.62, 1.99) | 0.74 |
| Margarate-17-0 | 1.13 (0.62) | 1.16 (0.65) | 0.92 (0.53, 1.56) | 0.75 |
| Gamma-Glutamylthreonine | 1.03 (0.29) | 1.03 (0.52) | 0.91 (0.51, 1.61) | 0.75 |
| 3-Methylglutarylcarnitine-2 | 2.23 (2.82) | 2.22 (3.61) | 0.91 (0.52, 1.61) | 0.75 |
| Androstenediol-3beta-17beta-Monosulfate-1 | 1.25 (1.30) | 1.26 (1.07) | 1.10 (0.60, 2.05) | 0.75 |
| 3-Hydroxypyridine-Glucuronide | 0.97 (0.91) | 1.01 (2.37) | 1.11 (0.55, 2.25) | 0.75 |
| 4-Hydroxyglutamate | 1.08 (0.95) | 1.07 (1.06) | 1.09 (0.62, 1.92) | 0.76 |
| Ranitidine-N-Oxide* | 0.13 (0.30) | 0.12 (0.20) | 1.09 (0.60, 2.00) | 0.76 |
| 3-7-Dimethylurate | 1.24 (1.28) | 1.33 (1.60) | 0.92 (0.52, 1.57) | 0.76 |
| 1-Methyladenosine | 0.99 (0.27) | 1.02 (0.51) | 0.92 (0.52, 1.59) | 0.76 |
| 5-6-Dihydrouridine | 1.13 (0.54) | 1.08 (0.35) | 1.09 (0.62, 2.02) | 0.76 |
| 2-Acetamidophenol-Sulfate | 1.93 (3.34) | 1.79 (4.30) | 0.91 (0.48, 1.72) | 0.77 |
| Maltose | 1.27 (0.98) | 1.20 (0.93) | 1.08 (0.63, 1.89) | 0.77 |
| Ribitol | 1.06 (0.59) | 1.03 (0.30) | 1.09 (0.63, 2.07) | 0.77 |
| Losartan | 0.10 (0.09) | 0.10 (0.13) | 0.91 (0.42, 1.76) | 0.77 |
| Maleate | 1.27 (0.83) | 1.47 (1.33) | 0.91 (0.46, 1.73) | 0.78 |
| Glycoursodeoxycholate | 1.23 (1.48) | 1.35 (1.37) | 0.91 (0.47, 1.71) | 0.78 |
| Gamma-Glutamylisoleucine* | 1.10 (0.52) | 1.08 (0.48) | 1.09 (0.61, 1.98) | 0.78 |
| 2-Hydroxypalmitate | 1.09 (0.42) | 1.07 (0.35) | 1.08 (0.62, 1.88) | 0.78 |
| 3-N-Acetyl-L-Cystein-S-Yl-Acetaminophen | 1.04 (2.04) | 1.14 (2.36) | 0.92 (0.49, 1.68) | 0.78 |
| Gluconate | 1.11 (0.59) | 1.12 (0.46) | 0.93 (0.52, 1.62) | 0.78 |
| Phenylacetylglutamine | 1.10 (0.62) | 1.08 (0.67) | 1.08 (0.62, 1.88) | 0.78 |
| Vanillic-Acid-Glycine | 2.59 (6.41) | 2.43 (3.44) | 1.08 (0.59, 1.98) | 0.79 |
| 1-6-Anhydroglucose | 1.34 (1.37) | 1.28 (1.59) | 1.07 (0.62, 1.86) | 0.79 |
| Allantoin | 1.02 (0.27) | 1.00 (0.27) | 1.08 (0.60, 1.95) | 0.79 |
| 1-Palmitoyl-Gpg-16-0* | 0.98 (0.33) | 1.01 (0.31) | 0.93 (0.54, 1.61) | 0.79 |
| Succinoyltaurine | 1.44 (1.42) | 1.36 (0.89) | 1.08 (0.61, 1.93) | 0.79 |
| Ergothioneine | 1.37 (1.23) | 1.38 (1.18) | 0.93 (0.52, 1.65) | 0.80 |
| Androstenediol-3beta-17beta-Disulfate-1 | 1.04 (0.81) | 1.20 (0.94) | 0.92 (0.49, 1.69) | 0.80 |
| Acetylcarnitine-C2 | 1.09 (0.40) | 1.07 (0.69) | 1.08 (0.57, 2.02) | 0.80 |
| Arabonate-Xylonate | 1.19 (0.82) | 1.12 (0.53) | 1.08 (0.59, 2.08) | 0.80 |
| Docosapentaenoate-Dpa-22-5n3 | 1.47 (1.28) | 1.33 (1.41) | 1.07 (0.61, 1.88) | 0.80 |
| N-Acetyltyrosine | 1.02 (0.68) | 0.98 (0.64) | 1.08 (0.58, 2.03) | 0.80 |
| Alpha-Hydroxyisocaproate | 1.11 (0.55) | 1.17 (0.73) | 0.93 (0.51, 1.62) | 0.80 |
| Glycine-Conjugate-Of-C10h14o2-1* | 1.16 (0.92) | 1.18 (0.83) | 0.93 (0.52, 1.64) | 0.80 |
| 13-Hode-9-Hode | 1.25 (1.27) | 1.30 (0.87) | 0.94 (0.53, 1.61) | 0.80 |
| Prolylglycine | 0.95 (0.65) | 1.01 (0.78) | 0.93 (0.51, 1.66) | 0.81 |
| Docosapentaenoate-N6-Dpa-22-5n6 | 1.23 (1.12) | 1.30 (1.05) | 0.94 (0.54, 1.60) | 0.81 |
| 3-Hydroxyoleoylcarnitine | 0.80 (0.54) | 0.80 (0.65) | 0.93 (0.51, 1.68) | 0.81 |
| Hexadecasphingosine-D16-1* | 1.17 (0.92) | 1.08 (0.79) | 1.07 (0.62, 1.84) | 0.81 |
| Metoprolol-Acid-Metabolite* | 0.19 (0.47) | 0.27 (0.56) | 0.93 (0.51, 1.64) | 0.81 |
| Nervonoylcarnitine-C24-1* | 1.08 (0.52) | 1.05 (0.61) | 1.07 (0.61, 1.91) | 0.81 |
| N-Formylanthranilic-Acid | 0.99 (0.53) | 1.10 (1.11) | 0.92 (0.44, 1.80) | 0.81 |
| Dodecadienoate-12-2* | 1.34 (0.71) | 1.21 (0.96) | 1.07 (0.59, 1.97) | 0.82 |
| 5-6-Dihydrothymine | 0.99 (0.29) | 1.01 (0.32) | 0.93 (0.51, 1.69) | 0.82 |
| 4-Methoxyphenol-Sulfate | 1.27 (1.71) | 1.11 (1.60) | 1.07 (0.61, 1.89) | 0.82 |
| Ranitidine | 0.11 (0.19) | 0.14 (0.28) | 0.94 (0.45, 1.63) | 0.82 |
| 4-Hydroxyphenylacetate | 1.18 (0.95) | 1.30 (0.97) | 0.94 (0.53, 1.62) | 0.82 |
| 2-Aminophenol-Sulfate | 3.42 (7.44) | 2.55 (5.69) | 1.07 (0.58, 2.12) | 0.83 |
| Butyrate-Isobutyrate-4-0 | 1.17 (0.67) | 1.30 (1.61) | 0.93 (0.42, 1.79) | 0.83 |
| 2-Methoxyhydroquinone-Sulfate-1 | 1.15 (1.28) | 1.23 (1.36) | 0.94 (0.53, 1.65) | 0.83 |
| Hexadecadienoate-16-2n6 | 1.24 (1.16) | 1.13 (0.88) | 1.06 (0.61, 1.90) | 0.83 |
| 3-Hydroxydecanoate | 1.41 (0.70) | 1.35 (0.94) | 1.06 (0.60, 1.89) | 0.83 |
| 3-Hydroxyhippurate | 3.04 (5.05) | 3.26 (4.89) | 0.94 (0.53, 1.62) | 0.84 |
| Androstenediol-3beta-17beta-Disulfate-2 | 1.08 (0.73) | 1.12 (0.82) | 1.06 (0.59, 1.93) | 0.84 |
| 3-Hydroxyadipate* | 0.93 (1.01) | 0.97 (1.15) | 0.94 (0.50, 1.73) | 0.84 |
| N-Acetylaspartate-Naa | 1.14 (0.54) | 1.07 (0.60) | 1.06 (0.61, 1.87) | 0.84 |
| Gentisate | 1.43 (1.03) | 1.41 (1.49) | 1.08 (0.51, 2.27) | 0.84 |
| 10-Heptadecenoate-17-1n7 | 1.41 (1.36) | 1.42 (1.47) | 0.95 (0.53, 1.62) | 0.84 |
| 4-Hydroxy-2-Oxoglutaric-Acid | 1.04 (1.19) | 1.07 (0.89) | 0.95 (0.51, 1.66) | 0.84 |
| 3-3-Hydroxyphenyl-Propionate | 2.09 (4.36) | 2.18 (2.86) | 0.95 (0.54, 1.65) | 0.84 |
| Adipoylcarnitine-C6-Dc | 1.43 (1.35) | 1.42 (1.30) | 0.95 (0.53, 1.66) | 0.85 |
| Vanillactate | 1.17 (0.75) | 1.13 (0.45) | 1.06 (0.59, 1.98) | 0.85 |
| Hydantoin-5-Propionate | 1.66 (1.69) | 1.62 (1.10) | 1.06 (0.60, 1.91) | 0.85 |
| 16-Hydroxypalmitate | 1.13 (0.43) | 1.08 (0.52) | 1.05 (0.61, 1.83) | 0.85 |
| 2-Methoxyresorcinol-Sulfate | 1.38 (2.14) | 1.54 (2.53) | 0.94 (0.49, 1.76) | 0.85 |
| 3-Methoxytyramine-Sulfate | 1.03 (1.07) | 1.02 (0.55) | 0.95 (0.52, 1.73) | 0.85 |
| 1-Methylurate | 1.56 (1.65) | 1.55 (1.88) | 1.05 (0.59, 1.85) | 0.86 |
| 1-3-7-Trimethylurate | 0.97 (0.68) | 0.95 (0.92) | 1.06 (0.58, 1.92) | 0.86 |
| Rivaroxaban | 0.64 (0.12) | 0.67 (0.30) | 0.95 (0.42, 1.68) | 0.86 |
| Dodecanedioate-C12 | 1.53 (1.46) | 1.54 (1.26) | 0.95 (0.55, 1.64) | 0.86 |
| Alanine | 0.99 (0.25) | 0.99 (0.26) | 1.05 (0.60, 1.86) | 0.86 |
| 2-Keto-3-Deoxy-Gluconate | 1.26 (0.71) | 1.24 (0.63) | 1.05 (0.59, 1.88) | 0.86 |
| 4-Acetamidophenylglucuronide | 2.79 (5.01) | 2.53 (5.22) | 1.05 (0.58, 1.90) | 0.86 |
| Taurochenodeoxycholate | 2.38 (4.19) | 2.41 (4.90) | 1.05 (0.58, 1.92) | 0.86 |
| Norfluoxetine | 0.22 (0.21) | 0.20 (0.15) | 1.05 (0.60, 2.05) | 0.87 |
| Nervonate-24-1n9* | 1.06 (0.39) | 1.07 (0.38) | 0.96 (0.56, 1.62) | 0.87 |
| 2-4-Or-2-5-Dimethylphenol-Sulfate | 1.51 (3.30) | 1.43 (2.05) | 1.05 (0.60, 1.89) | 0.87 |
| Dihomolinolenate-20-3n3-Or-3n6 | 1.27 (1.10) | 1.23 (1.03) | 1.05 (0.61, 1.80) | 0.87 |
| Tryptophan-Betaine | 1.34 (1.18) | 1.37 (1.28) | 0.96 (0.57, 1.62) | 0.87 |
| 1-Stearoyl-2-Oleoyl-Gps-18-0-18-1 | 1.75 (1.93) | 1.64 (1.29) | 1.04 (0.59, 1.81) | 0.87 |
| Picolinoylglycine | 1.08 (0.78) | 1.08 (1.25) | 1.05 (0.57, 1.95) | 0.88 |
| Isovalerylglycine | 1.06 (0.38) | 1.05 (0.63) | 1.04 (0.61, 1.82) | 0.89 |
| Myristoleate-14-1n5 | 1.45 (1.29) | 1.38 (1.46) | 0.96 (0.55, 1.67) | 0.89 |
| Glycocholate-Glucuronide-1 | 1.09 (2.39) | 1.10 (2.30) | 0.96 (0.54, 1.68) | 0.89 |
| 3-Hydroxy-2-Ethylpropionate | 1.08 (0.44) | 1.11 (0.55) | 0.96 (0.51, 1.77) | 0.89 |
| Theophylline | 1.19 (0.75) | 1.18 (1.05) | 0.96 (0.55, 1.66) | 0.89 |
| Propyl-4-Hydroxybenzoate-Sulfate | 2.27 (6.42) | 1.88 (4.62) | 1.04 (0.57, 1.94) | 0.90 |
| Hydroquinone-Sulfate | 1.16 (1.14) | 1.22 (1.28) | 0.97 (0.55, 1.68) | 0.90 |
| 3-Phosphoglycerate | 1.96 (2.10) | 1.75 (1.95) | 0.96 (0.53, 1.78) | 0.90 |
| Myo-Inositol | 1.21 (0.62) | 1.21 (0.55) | 0.97 (0.56, 1.67) | 0.90 |
| 3-Hydroxylaurate | 1.27 (0.67) | 1.20 (0.79) | 1.04 (0.57, 1.89) | 0.90 |
| 2-Methoxyhydroquinone-Sulfate-2 | 0.91 (0.96) | 0.93 (1.05) | 0.96 (0.53, 1.76) | 0.90 |
| Tetrahydrocortisol-Sulfate-1 | 1.06 (1.49) | 1.11 (1.40) | 1.04 (0.57, 1.84) | 0.90 |
| Desmethylnaproxen-Sulfate | 0.33 (0.90) | 0.37 (1.38) | 0.97 (0.51, 1.67) | 0.90 |
| Pregnenolone-Sulfate | 1.10 (0.75) | 1.17 (0.91) | 0.97 (0.54, 1.68) | 0.90 |
| 14-Or-15-Methylpalmitate-A17-0-Or-I17-0 | 1.28 (1.03) | 1.28 (0.91) | 0.97 (0.56, 1.66) | 0.90 |
| Cetirizine | 0.15 (0.41) | 0.16 (0.43) | 0.97 (0.54, 1.68) | 0.90 |
| Methylnaphthyl-Sulfate-1* | 0.47 (0.55) | 0.49 (0.58) | 1.03 (0.57, 1.82) | 0.90 |
| Dimethylglycine | 1.12 (0.67) | 1.13 (0.43) | 1.03 (0.58, 1.84) | 0.91 |
| Imidazole-Lactate | 1.08 (0.70) | 1.05 (0.56) | 1.03 (0.58, 1.89) | 0.91 |
| Ascorbic-Acid-2-Sulfate | 1.22 (0.73) | 1.20 (0.71) | 0.97 (0.56, 1.67) | 0.91 |
| Pseudouridine | 1.11 (0.44) | 1.08 (0.29) | 1.03 (0.57, 1.91) | 0.92 |
| Formiminoglutamate | 1.09 (1.06) | 1.11 (0.58) | 1.03 (0.57, 1.93) | 0.92 |
| Methionine | 0.97 (0.20) | 0.98 (0.26) | 1.03 (0.59, 1.79) | 0.93 |
| Gamma-Glutamyl-Alpha-Lysine | 0.99 (0.27) | 0.97 (0.39) | 1.02 (0.59, 1.79) | 0.94 |
| 2-Aminobutyrate | 1.09 (0.47) | 1.09 (0.43) | 0.98 (0.53, 1.83) | 0.94 |
| Dehydroepiandrosterone-Sulfate-Dhea-S | 1.07 (0.67) | 1.12 (0.84) | 1.02 (0.57, 1.83) | 0.94 |
| C-Glycosyltryptophan | 1.19 (0.84) | 1.17 (0.42) | 0.98 (0.53, 1.85) | 0.94 |
| Mannitol-Sorbitol | 2.69 (3.51) | 2.70 (7.15) | 1.02 (0.52, 1.92) | 0.94 |
| Hexadecanedioate-C16 | 1.28 (0.73) | 1.24 (0.75) | 1.02 (0.60, 1.76) | 0.94 |
| Threonate | 1.11 (0.65) | 1.07 (0.65) | 1.02 (0.59, 1.76) | 0.94 |
| 3-Hydroxyisobutyrate | 1.11 (0.49) | 1.18 (0.99) | 0.98 (0.50, 1.82) | 0.94 |
| Androstenediol-3alpha-17alpha-Monosulfate-3 | 1.44 (1.42) | 1.69 (2.32) | 0.98 (0.52, 1.75) | 0.94 |
| 21-Hydroxypregnenolone-Disulfate | 1.19 (0.88) | 1.25 (1.11) | 0.98 (0.55, 1.72) | 0.94 |
| Decadienedioic-Acid-C10-2-Dc | 1.36 (1.72) | 1.34 (1.40) | 1.02 (0.56, 1.79) | 0.94 |
| Pentadecanoate-15-0 | 1.18 (0.83) | 1.14 (0.53) | 1.02 (0.59, 1.80) | 0.94 |
| Serotonin | 1.42 (1.82) | 1.41 (1.46) | 1.02 (0.58, 1.78) | 0.94 |
| Glycocholate | 1.69 (2.97) | 1.82 (2.99) | 0.98 (0.52, 1.77) | 0.94 |
| 3-Hydroxymyristate | 1.19 (0.48) | 1.16 (0.74) | 0.98 (0.53, 1.76) | 0.94 |
| 7-Methylxanthine | 1.43 (1.02) | 1.44 (1.54) | 0.98 (0.56, 1.67) | 0.95 |
| S-Methylmethionine | 0.57 (0.75) | 0.55 (0.90) | 0.98 (0.55, 1.76) | 0.95 |
| Alpha-Ketoglutarate | 1.05 (0.43) | 1.06 (0.32) | 0.98 (0.56, 1.70) | 0.95 |
| 2-Hydroxydecanoate | 1.28 (1.01) | 1.26 (0.86) | 0.98 (0.56, 1.70) | 0.95 |
| 3-Hydroxyhexanoylcarnitine-1 | 1.15 (0.72) | 1.11 (0.44) | 1.02 (0.58, 1.84) | 0.95 |
| Oxalate-Ethanedioate | 1.07 (0.52) | 1.04 (0.59) | 1.02 (0.59, 1.77) | 0.95 |
| 3-4-Methyleneheptanoate | 1.14 (0.77) | 1.06 (0.97) | 1.02 (0.57, 1.80) | 0.96 |
| Ximenoylcarnitine-C26-1* | 1.10 (0.40) | 1.09 (0.46) | 0.99 (0.57, 1.69) | 0.96 |
| N6-Carbamoylthreonyladenosine | 1.21 (0.79) | 1.19 (0.51) | 0.98 (0.54, 1.82) | 0.96 |
| Sphingosine | 1.78 (2.14) | 1.74 (1.55) | 1.01 (0.56, 1.78) | 0.97 |
| Cholesterol | 1.07 (0.23) | 1.04 (0.30) | 1.01 (0.56, 1.84) | 0.97 |
| Hydrochlorothiazide | 0.18 (0.52) | 0.17 (0.34) | 0.99 (0.56, 1.79) | 0.97 |
| Piperine | 2.00 (3.19) | 2.14 (2.46) | 0.99 (0.52, 1.87) | 0.97 |
| S-Adenosylhomocysteine-Sah | 1.10 (0.53) | 1.09 (0.43) | 1.01 (0.57, 1.80) | 0.97 |
| Tyrosine | 1.02 (0.27) | 1.04 (0.34) | 1.01 (0.56, 1.80) | 0.97 |
| Branched-Chain-Straight-Chain-Or-Cyclopropyl-12-1-Fatty-Acid* | 1.39 (0.95) | 1.31 (1.25) | 0.99 (0.54, 1.79) | 0.97 |
| Montelukast | 0.27 (0.14) | 0.27 (0.13) | 1.01 (0.56, 1.82) | 0.97 |
| Lactate | 1.12 (0.76) | 1.15 (0.32) | 1.01 (0.54, 1.80) | 0.98 |
| Prolylhydroxyproline | 1.22 (0.64) | 1.20 (0.43) | 1.00 (0.57, 1.75) | 0.99 |
| Isoleucine | 1.03 (0.21) | 1.07 (0.35) | 1.00 (0.55, 1.84) | 0.99 |
| S-A-Amino-Omega-Caprolactam | 0.93 (0.44) | 0.93 (0.34) | 1.00 (0.55, 1.85) | 0.99 |
| Thc-Carboxylic-Acid-Glucuronide | 0.40 (1.27) | 0.43 (1.29) | 1.00 (0.54, 1.79) | 0.99 |
| Pregnenetriol-Sulfate* | 1.09 (0.64) | 1.16 (0.78) | 1.00 (0.55, 1.81) | 1.00 |
| Glycodeoxycholate | 1.52 (2.35) | 1.63 (3.94) | 1.00 (0.52, 1.80) | 1.00 |
| 7-Methylguanine | 0.99 (0.29) | 1.00 (0.32) | 1.00 (0.57, 1.76) | 1.00 |
| Sphingadienine | 1.16 (1.16) | 1.12 (1.14) | 1.00 (0.58, 1.71) | 1.00 |
| 5-Hepe | 0.50 (0.46) | 0.49 (0.57) | 1.00 (0.55, 1.81) | 1.00 |

1Odd ratios (OR) and 95% confidence intervals of clinical benefit (no benefit as the reference) were estimated using logistic regression models of the z-scored transformed and normalized metabolites. Statistical significance is considered at an alpha level 6.61e-05 after adjusting for multiple testing using the Bonferroni method. Logistic regression models were adjusted for sex, age at diagnosis, BMI (kg/m2), additional treatment (chemotherapy, radiation, or targeted therapy), Bristol Stool type, antibiotic use two months prior to collection, PPI use, and probiotic use.
