# Supplementary material for: Metagenomic and Metabolomic Correlates of Immunotherapy Response in Non-Small Cell Lung Cancer
Source: Research Square preprint supplement (doi:10.21203/rs.3.rs-10107631/v1), 2026-07-09
Supplement: Supplementary file 3 [file 4d581066f154c839c4b875b5.docx]

**Supplementary Table 1. Associations1 of alpha diversity metrics and relative abundance of a priori- exploratory selected bacteria species and genera with clinical benefit ( versus no benefit) among patients diagnosed with NSCLC at Moffitt Cancer Center, N=66**

| **Microbiome Feature** | **Clinical Benefit, N=34** | **No Clinical Benefit, N=30** | **OR (95% CI)** | ***P*** |
| --- | --- | --- | --- | --- |
| **Alpha Diversity** |  |  |  |  |
| Observed | 107.35 (25.49) | 102.97 (27.88) | 1.21 (0.63, 2.40) | 0.57 |
| Shannon | 2.79 (0.43) | 2.71 (0.36) | 1.19 (0.65, 2.21) | 0.58 |
| **A priori Species** |  |  |  |  |
| *Akkermansia muciniphila* | 0.89 (1.80) | 4.16 (8.89) | 0.84 (0.47, 1.43) | 0.52 |
| *Alistipes putredinis* | 2.07 (2.89) | 1.81 (2.04) | 0.93 (0.53, 1.64) | 0.80 |
| ***Bifidobacterium longum*** | **0.20 (0.44)** | **2.30 (6.71)** | **0.51 (0.25, 0.92)** | **0.04** |
| *Prevotella copri* | 1.51 (7.53) | 1.22 (6.67) | 1.39 (0.78, 2.90) | 0.29 |
| **A priori Genera** |  |  |  |  |
| *Akkermansia* | 0.89 (1.80) | 4.16 (8.89) | 0.84 (0.48, 1.44) | 0.54 |
| *Bacteroides* | 49.15 (19.65) | 43.98 (22.25) | 1.34 (0.78, 2.45) | 0.29 |
| ***Bifidobacterium*** | **0.83 (2.03)** | **3.55 (7.70)** | **0.44 (0.20, 0.84)** | **0.02** |
| *Blautia* | 2.68 (3.93) | 2.58 (2.62) | 0.77 (0.43, 1.33) | 0.36 |
| *Escherichia* | 0.54 (1.20) | 2.83 (7.18) | 0.75 (0.42, 1.32) | 0.32 |
| *Faecalibacterium* | 2.82 (2.92) | 1.57 (2.18) | 1.67 (0.91, 3.38) | 0.12 |
| *Ruminococcus* | 2.52 (3.48) | 1.49 (2.59) | 1.69 (0.94, 3.36) | 0.11 |
| **Exploratory Species** |  |  |  |  |
| *Alistipes finegoldii* | 1.14 (2.03) | 3.23 (6.75) | 0.76 (0.42, 1.34) | 0.35 |
| *Alistipes shahii* | 0.39 (0.51) | 0.41 (0.84) | 1.24 (0.72, 2.19) | 0.44 |
| *Anaerostipes hadrus* | 0.54 (0.61) | 1.66 (3.96) | 1.09 (0.59, 2.01) | 0.77 |
| *Anaerotruncus colihominis* | 0.15 (0.37) | 0.13 (0.20) | 0.93 (0.52, 1.65) | 0.79 |
| *Bacteroides caccae* | 2.99 (4.81) | 5.08 (10.83) | 0.65 (0.37, 1.12) | 0.13 |
| *Bacteroides cellulosilyticus* | 1.10 (2.31) | 2.94 (5.72) | 0.67 (0.37, 1.15) | 0.15 |
| *Bacteroides ovatus* | 2.60 (3.85) | 1.87 (3.35) | 1.09 (0.63, 1.90) | 0.76 |
| *Bacteroides stercoris* | 6.71 (10.05) | 2.52 (5.75) | 1.46 (0.84, 2.66) | 0.19 |
| *Bacteroides thetaiotaomicron* | 3.71 (4.63) | 3.64 (4.78) | 1.10 (0.63, 1.94) | 0.74 |
| *Bacteroides vulgatus* | 16.37 (11.67) | 13.16 (12.37) | 1.73 (0.97, 3.34) | 0.08 |
| *Bacteroides xylanisolvens* | 1.42 (2.76) | 3.08 (6.14) | 0.79 (0.43, 1.39) | 0.42 |
| *Blautia obeum* | 0.29 (0.37) | 0.27 (0.42) | 1.16 (0.65, 2.09) | 0.61 |
| *Blautia producta* | 0.16 (0.59) | 0.14 (0.31) | 0.78 (0.42, 1.41) | 0.42 |
| *Blautia sp CAG 257* | 0.30 (0.50) | 0.61 (1.11) | 0.65 (0.35, 1.14) | 0.15 |
| *Blautia wexlerae* | 0.63 (1.22) | 0.73 (1.49) | 1.00 (0.59, 1.71) | 0.99 |
| *Clostridium bolteae* | 0.17 (0.47) | 0.29 (0.74) | 0.72 (0.40, 1.23) | 0.24 |
| *Clostridium clostridioforme* | 0.19 (0.39) | 0.54 (1.41) | 0.71 (0.39, 1.23) | 0.23 |
| *Clostridium innocuum* | 0.17 (0.32) | 0.53 (1.49) | 0.88 (0.47, 1.60) | 0.67 |
| *Clostridium leptum* | 0.16 (0.38) | 0.11 (0.17) | 0.95 (0.55, 1.64) | 0.86 |
| *Clostridium sp CAG 58* | 0.13 (0.15) | 0.22 (0.35) | 0.62 (0.32, 1.12) | 0.12 |
| *Clostridium symbiosum* | 0.10 (0.30) | 0.26 (0.70) | 0.68 (0.37, 1.21) | 0.21 |
| *Collinsella aerofaciens* | 0.45 (0.75) | 1.07 (2.48) | 0.82 (0.44, 1.45) | 0.50 |
| *Collinsella stercoris* | 0.11 (0.43) | 0.24 (1.13) | 0.71 (0.39, 1.24) | 0.23 |
| *Dorea sp CAG 317* | 0.15 (0.40) | 0.11 (0.17) | 1.13 (0.65, 2.02) | 0.65 |
| *Eggerthella lenta* | 0.30 (0.32) | 0.32 (0.49) | 1.24 (0.70, 2.23) | 0.47 |
| *Eisenbergiella massiliensis* | 0.19 (0.33) | 0.58 (1.89) | 0.69 (0.37, 1.20) | 0.20 |
| *Eisenbergiella tayi* | 0.24 (0.96) | 0.41 (0.96) | 0.70 (0.38, 1.23) | 0.23 |
| *Erysipelatoclostridium ramosum* | 0.13 (0.24) | 0.22 (0.28) | 0.66 (0.35, 1.16) | 0.16 |
| *Escherichia coli* | 0.54 (1.20) | 2.83 (7.18) | 0.73 (0.40, 1.27) | 0.27 |
| *Eubacterium hallii* | 0.38 (0.60) | 0.41 (0.65) | 0.99 (0.56, 1.74) | 0.98 |
| *Eubacterium rectale* | 1.77 (2.47) | 1.49 (4.03) | 1.67 (0.91, 3.24) | 0.11 |
| *Faecalibacterium prausnitzii* | 2.82 (2.92) | 1.57 (2.18) | 1.60 (0.89, 3.16) | 0.14 |
| *Flavonifractor plautii* | 0.62 (0.69) | 0.67 (0.71) | 0.70 (0.37, 1.23) | 0.23 |
| *Fusicatenibacter saccharivorans* | 0.77 (1.09) | 1.34 (2.35) | 1.02 (0.56, 1.85) | 0.95 |
| *Hungatella hathewayi* | 0.07 (0.14) | 0.97 (4.15) | 0.73 (0.39, 1.27) | 0.28 |
| *Intestinimonas butyriciproducens* | 0.24 (0.52) | 0.15 (0.52) | 1.21 (0.71, 2.14) | 0.48 |
| *Lawsonibacter asaccharolyticus* | 0.28 (0.45) | 0.37 (0.69) | 1.05 (0.59, 1.90) | 0.87 |
| *Odoribacter splanchnicus* | 0.76 (0.82) | 0.68 (0.73) | 1.20 (0.69, 2.14) | 0.51 |
| *Parabacteroides distasonis* | 3.13 (3.06) | 2.96 (3.20) | 0.78 (0.43, 1.35) | 0.38 |
| *Parabacteroides merdae* | 2.21 (2.34) | 1.48 (1.55) | 0.99 (0.57, 1.72) | 0.97 |
| *Roseburia faecis* | 1.18 (1.60) | 0.53 (1.37) | 2.45 (1.29, 5.22) | 0.01 |
| *Roseburia hominis* | 0.41 (0.60) | 0.28 (0.45) | 1.06 (0.61, 1.81) | 0.84 |
| *Roseburia intestinalis* | 0.72 (1.64) | 0.48 (1.19) | 0.94 (0.50, 1.73) | 0.84 |
| *Roseburia inulinivorans* | 0.76 (1.28) | 0.48 (1.01) | 1.53 (0.85, 2.88) | 0.17 |
| *Ruminococcus gnavus* | 0.81 (3.62) | 0.43 (0.82) | 0.58 (0.30, 1.02) | 0.07 |
| *Ruminococcus torques* | 0.40 (0.84) | 0.19 (0.30) | 0.94 (0.52, 1.68) | 0.83 |
| *Ruthenibacterium lactatiformans* | 1.10 (1.58) | 0.90 (1.45) | 1.29 (0.74, 2.32) | 0.38 |
| *Sellimonas intestinalis* | 0.08 (0.13) | 0.18 (0.42) | 0.74 (0.41, 1.29) | 0.30 |
| *Streptococcus salivarius* | 0.23 (0.58) | 0.09 (0.27) | 0.96 (0.53, 1.73) | 0.89 |
| **Exploratory Genera** |  |  |  |  |
| *Alistipes* | 4.47 (5.30) | 5.59 (7.15) | 0.80 (0.44, 1.42) | 0.45 |
| *Anaerostipes* | 0.55 (0.60) | 1.68 (3.96) | 1.02 (0.55, 1.86) | 0.94 |
| *Anaerotruncus* | 0.19 (0.41) | 0.17 (0.28) | 0.98 (0.56, 1.70) | 0.93 |
| *Clostridium* | 0.32 (0.33) | 0.45 (0.73) | 1.02 (0.57, 1.80) | 0.96 |
| *Collinsella* | 0.66 (0.95) | 1.49 (2.74) | 0.62 (0.31, 1.21) | 0.17 |
| *Coprococcus* | 0.50 (1.08) | 0.17 (0.30) | 1.66 (0.92, 3.23) | 0.11 |
| *Dorea* | 0.69 (0.73) | 0.39 (0.39) | 1.83 (1.00, 3.73) | 0.07 |
| *Eggerthella* | 0.30 (0.32) | 0.32 (0.49) | 1.24 (0.70, 2.25) | 0.46 |
| *Eisenbergiella* | 0.42 (1.06) | 0.99 (2.04) | 0.48 (0.23, 0.91) | 0.03 |
| *Erysipelatoclostridium* | 0.35 (0.44) | 0.86 (1.55) | 0.36 (0.16, 0.72) | 0.01 |
| *Eubacterium* | 3.49 (4.88) | 3.01 (4.17) | 1.15 (0.63, 2.08) | 0.65 |
| *Firmicutes unclassified* | 0.65 (1.40) | 1.00 (1.82) | 0.70 (0.38, 1.21) | 0.22 |
| *Flavonifractor* | 0.62 (0.70) | 0.68 (0.71) | 0.70 (0.35, 1.23) | 0.25 |
| *Fusicatenibacter* | 0.77 (1.09) | 1.34 (2.35) | 1.02 (0.55, 1.87) | 0.95 |
| *Hungatella* | 0.07 (0.14) | 0.97 (4.15) | 0.75 (0.41, 1.32) | 0.33 |
| *Intestinimonas* | 0.24 (0.52) | 0.15 (0.52) | 1.19 (0.69, 2.10) | 0.52 |
| *Lachnoclostridium* | 0.74 (1.07) | 1.36 (2.38) | 0.69 (0.38, 1.21) | 0.21 |
| *Lachnospiraceae unclassified* | 1.77 (2.47) | 1.49 (4.03) | 1.36 (0.75, 2.59) | 0.32 |
| *Lactobacillus* | 0.10 (0.31) | 0.29 (1.47) | 1.04 (0.59, 1.83) | 0.90 |
| *Lawsonibacter* | 0.28 (0.45) | 0.37 (0.69) | 1.06 (0.59, 1.94) | 0.85 |
| *Odoribacter* | 0.76 (0.82) | 0.69 (0.75) | 1.12 (0.65, 1.98) | 0.68 |
| *Oscillibacter* | 0.33 (0.54) | 0.55 (1.76) | 1.35 (0.78, 2.49) | 0.30 |
| *Parabacteroides* | 6.43 (3.85) | 4.65 (3.86) | 1.34 (0.77, 2.44) | 0.31 |
| *Phascolarctobacterium* | 0.19 (0.21) | 0.28 (0.38) | 0.96 (0.55, 1.66) | 0.88 |
| *Roseburia* | 3.15 (2.88) | 1.81 (2.62) | 2.12 (1.13, 4.30) | 0.03 |
| *Ruminococcaceae unclassified* | 1.87 (3.80) | 0.36 (0.45) | 1.61 (0.90, 3.10) | 0.12 |
| *Ruthenibacterium* | 1.10 (1.58) | 0.90 (1.45) | 1.33 (0.76, 2.37) | 0.32 |
| *Sellimonas* | 0.08 (0.13) | 0.18 (0.42) | 0.73 (0.40, 1.28) | 0.28 |
| *Streptococcus* | 0.52 (0.89) | 0.29 (0.70) | 1.09 (0.61, 1.96) | 0.77 |

1Odd ratios (OR) and 95% confidence intervals of clinical benefit (no benefit as the reference) were estimated using logistic regression models of the z-scored alpha diversity metrics and the center-log ratio and z-scored transformed relative abundances. Statistical significance for a priori bacteria is considered at an alpha level of 0.05, and exploratory analysis is considered at an alpha level of 0.001 and 0.002 for genus and species level, respectively. Logistic regression models were adjusted for sex, age at diagnosis, BMI (kg/m2), additional treatment (chemotherapy, radiation, or targeted therapy), Bristol Stool type, antibiotic use two months prior to collection, PPI use, and probiotic use.
