# Supplementary material for: Metagenomic and Metabolomic Correlates of Immunotherapy Response in Non-Small Cell Lung Cancer
Source: Research Square preprint supplement (doi:10.21203/rs.3.rs-10107631/v1), 2026-07-09
Supplement: Supplementary file 4 [file 93729706c97ce56d5a63748c.docx]

**Supplementary Table 2. Microbiome regression-based analysis tests of the multivariable associations1 of beta diversity with clinical benefit (versus no benefit) among patients diagnosed with NSCLC at Moffitt Cancer Center, N=64**

| Test | R2 Bray-Curtis | *P*-value2 |
| --- | --- | --- |
| Davies | 0.01 | 0.046 |
| Permutation | 0.01 | 0.068 |

1 MiRKAT models adjusted for age, sex, and intervention arm (intervention or control arm).

2 After correcting for multiple testing via Bonferroni correction, significant p values were p<0.03.

Abbreviation: MiRKAT, Microbiome regression-based analysis tests.
