# Supplementary material for: Metagenomic and Metabolomic Correlates of Immunotherapy Response in Non-Small Cell Lung Cancer
Source: Research Square preprint supplement (doi:10.21203/rs.3.rs-10107631/v1), 2026-07-09
Supplement: Supplementary file 5 [file 9f95c46dd616a77b36f3cbc1.docx]

**Supplementary Table 4. Associations1 of lipid metabolites with clinical benefit (versus no benefit) among patients diagnosed with NSCLC at Moffitt Cancer Center, N=36**

| Lipid | Clinical Benefit, N=21 | No Clinical Benefit, N=15 | OR (95% CI) | *P* |
| --- | --- | --- | --- | --- |
| TG 51:2|TG 16:0_17:1_18:1 | 0.30 (0.85) | -0.53 (0.70) | 4.52 (1.59, 17.19) | 0.01 |
| TG 50:2|TG 16:0_16:1_18:1 | 0.17 (0.75) | -0.48 (0.62) | 7.49 (1.88, 46.48) | 0.01 |
| TG 50:3|TG 16:0_16:1_18:2 | 0.26 (0.72) | -0.42 (0.74) | 4.21 (1.42, 16.22) | 0.02 |
| LPC 15:0/0:0 | 0.23 (1.10) | -0.36 (0.62) | 5.82 (1.62, 32.92) | 0.02 |
| TG 49:3|TG 15:0_16:1_18:2 | 0.22 (0.80) | -0.47 (0.78) | 3.28 (1.26, 10.90) | 0.03 |
| HexCer 33:1;4O|HexCer 18:0;3O/15:1;(2OH) | 0.24 (0.99) | -0.49 (0.53) | 4.09 (1.38, 18.32) | 0.03 |
| DG 34:1 | 0.28 (1.00) | -0.32 (0.81) | 3.28 (1.19, 12.09) | 0.04 |
| DG 40:6|DG 18:2_22:4 | 0.27 (1.02) | -0.45 (0.50) | 3.25 (1.18, 12.05) | 0.04 |
| LPC 14:0/0:0 | 0.34 (1.19) | -0.26 (0.79) | 2.71 (1.16, 8.51) | 0.04 |
| DG 36:2|DG 18:1_18:1 | 0.23 (0.88) | -0.37 (0.55) | 5.13 (1.34, 35.98) | 0.05 |
| LPC 16:1/0:0 | 0.12 (0.86) | -0.36 (0.69) | 3.06 (1.12, 10.61) | 0.05 |
| PC 33:1 | 0.15 (0.77) | -0.41 (0.80) | 3.16 (1.13, 11.43) | 0.05 |
| TG 51:2|TG 16:0_17:0_18:2 | 0.26 (0.81) | -0.38 (0.86) | 2.66 (1.09, 7.76) | 0.05 |
| DG 34:3|DG 16:1_18:2 | 0.21 (0.84) | -0.41 (0.71) | 3.72 (1.20, 17.31) | 0.05 |
| DG 32:1 | 0.27 (0.93) | -0.29 (0.86) | 3.16 (1.17, 12.06) | 0.05 |
| LPC 20:3/0:0 | 0.28 (1.30) | -0.35 (0.43) | 3.70 (1.30, 17.58) | 0.05 |
| TG 50:1|TG 16:0_16:0_18:1 | 0.12 (0.78) | -0.40 (0.88) | 4.14 (1.20, 21.75) | 0.05 |
| DG 34:1|DG 16:0_18:1 | 0.19 (0.92) | -0.35 (0.69) | 3.51 (1.16, 15.60) | 0.05 |
| LPC 22:5/0:0 | 0.16 (1.14) | -0.29 (0.59) | 3.72 (1.17, 16.53) | 0.05 |
| TG O-36:2|TG O-16:2_10:0_10:0 | 0.30 (0.96) | -0.32 (0.64) | 3.88 (1.18, 20.14) | 0.05 |
| PC 40:7|PC 20:3_20:4 | 0.20 (0.87) | -0.31 (0.88) | 2.95 (1.11, 10.57) | 0.05 |
| DG 32:1|DG 14:0_18:1 | 0.30 (1.04) | -0.36 (0.72) | 3.43 (1.25, 16.97) | 0.06 |
| CAR 16:0 | 0.13 (0.99) | -0.33 (0.82) | 2.79 (1.09, 9.33) | 0.06 |
| PC 38:3|PC 18:0_20:3 | 0.51 (1.04) | -0.20 (0.99) | 2.30 (1.06, 6.24) | 0.06 |
| TG 38:0|TG 10:0_12:0_16:0 | -0.19 (0.79) | 0.43 (1.25) | 0.41 (0.14, 0.94) | 0.06 |
| LPC 14:0 | 0.37 (1.25) | -0.15 (0.59) | 2.54 (1.08, 8.22) | 0.06 |
| PC 32:1|PC 16:0_16:1 | 0.10 (0.77) | -0.35 (0.49) | 3.82 (1.08, 19.49) | 0.06 |
| TG 51:3|TG 15:0_18:1_18:2 | 0.15 (0.80) | -0.42 (0.83) | 2.85 (1.03, 9.74) | 0.06 |
| PI 36:4 | 0.32 (1.15) | -0.28 (0.83) | 2.05 (1.01, 4.87) | 0.07 |
| DG 38:4|DG 18:2_20:2 | 0.32 (1.08) | -0.40 (0.75) | 3.12 (1.16, 14.79) | 0.07 |
| PC 40:5|PC 18:0_22:5a | 0.33 (0.94) | -0.20 (1.06) | 2.28 (1.00, 6.34) | 0.07 |
| PE 36:2 | -0.26 (0.94) | 0.39 (1.24) | 0.49 (0.21, 1.02) | 0.07 |
| LPC 20:3 | 0.26 (1.19) | -0.20 (0.55) | 2.43 (1.03, 7.57) | 0.07 |
| PI 38:4a | 0.34 (1.15) | -0.17 (0.85) | 2.09 (0.98, 5.12) | 0.08 |
| TG 49:1|TG 15:0_16:0_18:1 | 0.17 (0.89) | -0.37 (0.87) | 2.75 (1.03, 9.96) | 0.08 |
| PC 42:6 | 0.36 (0.91) | -0.19 (1.00) | 2.13 (0.97, 5.39) | 0.08 |
| DG 40:6 | 0.20 (1.08) | -0.43 (0.52) | 2.54 (0.98, 8.25) | 0.08 |
| TG 60:12|TG 18:2_20:4_22:6 | -0.14 (0.77) | 0.19 (0.82) | 0.39 (0.12, 1.05) | 0.08 |
| LPC 16:0/0:0 | 0.10 (1.15) | -0.29 (0.74) | 3.53 (1.12, 18.34) | 0.08 |
| CE 18:3 | 0.12 (0.78) | -0.28 (0.64) | 2.67 (0.94, 9.20) | 0.09 |
| DG 40:5|DG 18:1_22:4 | 0.18 (1.16) | -0.40 (0.56) | 2.82 (1.07, 12.96) | 0.09 |
| CAR 18:0 | 0.16 (0.85) | -0.20 (1.11) | 2.14 (0.94, 5.84) | 0.09 |
| LPC 20:4 | 0.06 (0.97) | -0.32 (0.59) | 2.59 (0.96, 9.63) | 0.10 |
| TG O-52:3|TG O-18:1_16:0_18:2 | -0.20 (0.51) | 0.22 (0.75) | 0.33 (0.08, 1.13) | 0.10 |
| PC 39:10 | -0.16 (0.99) | 0.40 (1.14) | 0.53 (0.23, 1.10) | 0.11 |
| TG 56:8|TG 18:1_18:2_20:5 | -0.25 (0.82) | 0.23 (1.16) | 0.50 (0.20, 1.10) | 0.11 |
| DG 32:0 | 0.12 (0.89) | -0.27 (1.04) | 2.26 (0.90, 7.00) | 0.11 |
| LPC 22:4/0:0 | 0.10 (1.19) | -0.27 (0.64) | 2.77 (0.97, 11.18) | 0.11 |
| TG 40:0|TG 10:0_14:0_16:0 | -0.18 (0.70) | 0.33 (1.18) | 0.43 (0.13, 1.08) | 0.11 |
| CE 16:1 | 0.03 (0.76) | -0.32 (0.50) | 3.22 (0.87, 16.83) | 0.11 |
| LPC 18:0/0:0 | 0.13 (1.05) | -0.20 (0.80) | 2.66 (0.96, 11.01) | 0.12 |
| DG 34:2|DG 16:0_18:2 | 0.06 (0.81) | -0.28 (0.51) | 3.52 (0.91, 23.06) | 0.12 |
| PC 36:3|PC 18:1_18:2 | -0.29 (0.87) | 0.18 (1.02) | 0.47 (0.17, 1.14) | 0.12 |
| LPC 18:0 | 0.14 (1.03) | -0.17 (0.70) | 2.50 (0.92, 10.00) | 0.12 |
| PE 34:2|PE 16:0_18:2 | -0.21 (1.05) | 0.38 (1.08) | 0.56 (0.25, 1.13) | 0.12 |
| DG 28:2 | -0.28 (0.40) | 0.05 (0.93) | 0.34 (0.06, 1.13) | 0.13 |
| NAE 19:0 | -0.16 (0.91) | 0.34 (1.10) | 0.58 (0.26, 1.16) | 0.14 |
| DG 36:1 | 0.04 (0.73) | -0.25 (0.75) | 2.60 (0.78, 10.74) | 0.14 |
| PE 36:2|PE 18:0_18:2 | -0.20 (1.04) | 0.27 (1.02) | 0.55 (0.23, 1.19) | 0.15 |
| TG 48:1|TG 14:0_16:0_18:1 | 0.16 (0.91) | -0.22 (0.93) | 2.07 (0.85, 6.39) | 0.15 |
| LPE 22:6 | 0.07 (0.98) | -0.22 (0.89) | 1.90 (0.83, 5.02) | 0.15 |
| TG O-34:0|TG O-14:0_10:0_10:0 | 0.07 (0.78) | -0.29 (0.46) | 3.17 (0.79, 20.35) | 0.15 |
| DG 30:5 | -0.27 (0.44) | 0.07 (1.01) | 0.39 (0.08, 1.18) | 0.16 |
| PE 36:3|PE 18:1_18:2 | -0.26 (1.04) | 0.31 (0.90) | 0.58 (0.26, 1.19) | 0.16 |
| LPC O-16:1 | 0.03 (0.77) | -0.21 (0.90) | 2.15 (0.78, 6.94) | 0.16 |
| TG O-52:2|TG O-18:1_16:0_18:1 | -0.22 (0.53) | 0.31 (1.31) | 0.54 (0.20, 1.19) | 0.16 |
| TG 51:1|TG 16:0_17:0_18:1 | 0.09 (0.80) | -0.29 (0.93) | 2.06 (0.80, 6.29) | 0.16 |
| TG 53:5|TG 15:0_18:1_20:4 | 0.15 (1.16) | -0.36 (0.66) | 1.96 (0.88, 6.15) | 0.16 |
| PC 36:3|PC 16:0_20:3 | 0.22 (0.97) | -0.22 (1.17) | 1.82 (0.83, 4.78) | 0.16 |
| PC 35:4 | 0.05 (0.93) | -0.35 (0.75) | 1.86 (0.81, 4.90) | 0.17 |
| PC 38:7 | -0.11 (0.57) | 0.34 (1.62) | 0.59 (0.25, 1.20) | 0.18 |
| DG 38:3 | 0.10 (0.93) | -0.28 (0.51) | 2.47 (0.82, 12.22) | 0.18 |
| PI 36:3a | -0.17 (1.01) | 0.34 (0.81) | 0.50 (0.16, 1.25) | 0.18 |
| DG 36:1|DG 18:0_18:1 | 0.00 (0.67) | -0.25 (0.63) | 2.61 (0.69, 12.52) | 0.18 |
| DG 32:2|DG 14:0_18:2 | 0.10 (0.93) | -0.22 (0.75) | 2.06 (0.79, 7.41) | 0.19 |
| NAE 15:0 | -0.31 (0.79) | 0.12 (0.97) | 0.57 (0.23, 1.28) | 0.19 |
| DG 36:3|DG 18:1_18:2 | 0.06 (0.82) | -0.29 (0.54) | 2.48 (0.73, 12.50) | 0.19 |
| PC 36:4a | -0.25 (0.74) | 0.15 (0.96) | 0.51 (0.17, 1.35) | 0.20 |
| PC 40:5|PC 18:0_22:5b | 0.23 (1.24) | -0.15 (0.77) | 1.73 (0.82, 4.45) | 0.20 |
| DG 36:5|DG 16:1_20:4 | 0.30 (1.43) | -0.27 (0.85) | 1.65 (0.86, 4.52) | 0.20 |
| DG 38:2 | -0.27 (0.88) | 0.16 (1.03) | 0.61 (0.27, 1.28) | 0.20 |
| PC 42:8|PC 20:4_22:4 | -0.06 (0.89) | -0.27 (0.85) | 1.82 (0.75, 4.93) | 0.20 |
| TG 52:2|TG 16:0_18:1_18:1 | 0.15 (0.99) | -0.30 (0.76) | 1.93 (0.75, 5.99) | 0.20 |
| DG 34:2 | 0.10 (0.96) | -0.20 (0.69) | 2.09 (0.73, 7.99) | 0.21 |
| HexCer 42:1;2O|HexCer 18:1;2O/24:0 | -0.24 (0.60) | 0.28 (1.37) | 0.60 (0.24, 1.26) | 0.21 |
| LPC 20:2/0:0 | 0.14 (1.42) | -0.22 (0.41) | 2.72 (0.92, 18.42) | 0.22 |
| PE 38:5 | -0.22 (0.69) | 0.06 (0.67) | 0.50 (0.15, 1.43) | 0.22 |
| PE 38:5|PE 16:0_22:5 | -0.22 (0.68) | 0.06 (0.68) | 0.50 (0.15, 1.45) | 0.23 |
| TG 47:1|TG 14:0_15:0_18:1 | 0.12 (1.03) | -0.22 (0.72) | 1.89 (0.78, 6.36) | 0.23 |
| LPC 22:6/0:0 | 0.10 (1.10) | -0.21 (0.73) | 1.75 (0.77, 5.16) | 0.23 |
| PC 37:7|PC 17:3_20:4 | -0.06 (1.05) | 0.21 (1.17) | 0.64 (0.29, 1.29) | 0.23 |
| PE 36:5 | -0.07 (0.55) | 0.21 (1.29) | 0.61 (0.24, 1.35) | 0.23 |
| DG 32:0|DG 16:0_16:0 | 0.02 (0.77) | -0.26 (0.93) | 1.86 (0.70, 5.81) | 0.24 |
| PI 36:3b | 0.16 (0.94) | -0.09 (1.02) | 1.72 (0.73, 4.59) | 0.24 |
| TG 54:5|TG 16:0_18:1_20:4 | 0.11 (1.10) | -0.28 (0.65) | 1.77 (0.73, 5.20) | 0.24 |
| PC O-35:6 | -0.28 (0.87) | 0.18 (0.99) | 0.61 (0.25, 1.34) | 0.24 |
| PC 35:4|PC 15:0_20:4 | -0.01 (0.99) | -0.38 (0.81) | 1.62 (0.75, 3.90) | 0.24 |
| PE P-36:1|PE P-18:0_18:1 | -0.34 (0.78) | 0.11 (1.12) | 0.63 (0.28, 1.34) | 0.24 |
| NAE 23:0 | -0.18 (0.87) | 0.23 (1.19) | 0.66 (0.30, 1.31) | 0.25 |
| DG 38:4 | 0.16 (1.32) | -0.23 (0.56) | 1.66 (0.79, 4.97) | 0.25 |
| HexCer 42:2;2O|HexCer 18:1;2O/24:1 | -0.17 (0.91) | 0.20 (1.10) | 0.64 (0.27, 1.35) | 0.25 |
| TG 58:11|TG 18:2_18:3_22:6 | -0.09 (0.88) | 0.17 (1.00) | 0.61 (0.24, 1.38) | 0.25 |
| NAE 10:0 | 0.19 (1.37) | -0.23 (0.52) | 1.88 (0.80, 7.11) | 0.25 |
| PC 30:0|PC 14:0_16:0 | 0.15 (0.88) | -0.19 (1.16) | 1.57 (0.76, 3.79) | 0.25 |
| PI 36:1 | -0.11 (0.64) | 0.33 (1.21) | 0.61 (0.24, 1.39) | 0.26 |
| NAE 22:4 | 0.23 (1.37) | -0.21 (0.50) | 1.79 (0.81, 7.43) | 0.26 |
| TG 48:2|TG 14:0_16:0_18:2 | 0.14 (0.89) | -0.15 (1.00) | 1.62 (0.73, 4.00) | 0.26 |
| HexCer 36:1;2O|HexCer 18:1;2O/18:0 | -0.27 (0.80) | 0.09 (1.12) | 0.63 (0.27, 1.37) | 0.26 |
| PC 36:4|PC 18:2_18:2 | -0.25 (0.76) | 0.11 (0.93) | 0.58 (0.21, 1.46) | 0.26 |
| SM 47:3;3O | -0.30 (0.93) | 0.15 (1.08) | 0.66 (0.30, 1.34) | 0.26 |
| NAE 24:4 | 0.28 (1.47) | -0.19 (0.41) | 1.94 (0.82, 9.37) | 0.26 |
| Cer 42:2;2O|Cer 18:1;2O/24:1 | -0.10 (1.05) | 0.23 (1.12) | 0.65 (0.28, 1.34) | 0.27 |
| TG 58:6|TG 18:0_18:1_22:5 | 0.15 (1.18) | -0.32 (0.62) | 1.80 (0.70, 5.89) | 0.27 |
| TG O-42:5|TG O-18:5_12:0_12:0 | -0.24 (1.00) | 0.17 (1.11) | 0.68 (0.33, 1.33) | 0.27 |
| Cer 38:0;2O|Cer 18:0;2O/20:0 | -0.07 (0.83) | -0.38 (0.59) | 1.88 (0.69, 7.36) | 0.27 |
| TG 53:2|TG 16:0_18:1_19:1 | 0.14 (0.97) | -0.27 (0.77) | 1.71 (0.68, 4.82) | 0.27 |
| TG 42:0|TG 12:0_14:0_16:0 | -0.14 (0.75) | 0.20 (1.06) | 0.58 (0.19, 1.44) | 0.27 |
| NAE 20:1 | -0.28 (0.94) | 0.14 (1.06) | 0.68 (0.32, 1.37) | 0.29 |
| TG 55:3|TG 18:1_18:1_19:1 | -0.11 (0.79) | 0.11 (1.39) | 0.67 (0.30, 1.38) | 0.29 |
| NAE 22:1 | 0.26 (1.44) | -0.20 (0.53) | 1.79 (0.80, 7.75) | 0.29 |
| DG 38:5|DG 18:1_20:4 | 0.14 (1.34) | -0.26 (0.62) | 1.53 (0.76, 4.05) | 0.29 |
| LPC 17:0/0:0 | 0.01 (1.09) | -0.12 (0.80) | 1.82 (0.69, 7.36) | 0.29 |
| PC 32:1 | 0.15 (0.95) | -0.19 (0.84) | 1.59 (0.68, 4.18) | 0.30 |
| PC O-40:8 | -0.17 (0.74) | 0.15 (0.92) | 0.62 (0.23, 1.51) | 0.30 |
| DG 36:4|DG 16:0_20:4 | 0.12 (1.24) | -0.21 (0.84) | 1.49 (0.73, 3.60) | 0.30 |
| PC O-36:6 | -0.15 (0.63) | 0.12 (1.01) | 0.61 (0.22, 1.52) | 0.30 |
| PC O-42:6 | -0.05 (0.89) | 0.22 (1.40) | 0.71 (0.34, 1.36) | 0.31 |
| DG 34:3|DG 16:0_18:3 | 0.07 (1.11) | -0.22 (0.55) | 1.87 (0.76, 9.64) | 0.31 |
| PC O-40:5 | -0.17 (0.76) | 0.06 (1.22) | 0.66 (0.28, 1.44) | 0.31 |
| TG 48:4|TG 14:0_16:1_18:3 | -0.13 (0.98) | 0.30 (1.35) | 0.70 (0.31, 1.33) | 0.31 |
| TG 50:0|TG 15:0_15:0_20:0 | 0.12 (0.89) | -0.23 (0.94) | 1.55 (0.69, 3.88) | 0.31 |
| CAR 19:4 | -0.18 (0.95) | 0.18 (1.12) | 0.70 (0.33, 1.39) | 0.31 |
| SM 34:0;2O | 0.00 (1.18) | 0.30 (0.91) | 0.71 (0.34, 1.40) | 0.31 |
| LPE 20:4 | 0.06 (1.33) | -0.23 (0.53) | 1.77 (0.76, 6.92) | 0.32 |
| DG 40:4 | -0.23 (0.97) | 0.11 (0.91) | 0.68 (0.31, 1.44) | 0.32 |
| DG 32:2 | 0.06 (0.92) | -0.14 (0.83) | 1.63 (0.66, 5.06) | 0.32 |
| TG 56:6|TG 16:0_18:2_22:4 | 0.08 (1.12) | -0.34 (0.66) | 1.64 (0.66, 4.87) | 0.33 |
| PI 40:5 | 0.27 (1.10) | -0.07 (1.27) | 1.38 (0.73, 2.70) | 0.33 |
| LPC 17:1/0:0 | 0.01 (0.80) | -0.18 (1.15) | 1.54 (0.68, 4.10) | 0.33 |
| NAE 25:0 | -0.35 (0.81) | -0.05 (0.79) | 0.63 (0.23, 1.59) | 0.33 |
| HexCer 40:1;2O|HexCer 18:1;2O/22:0 | -0.21 (0.74) | 0.22 (1.34) | 0.70 (0.32, 1.40) | 0.34 |
| DG 36:3 | 0.11 (0.96) | -0.19 (0.71) | 1.66 (0.63, 5.37) | 0.34 |
| PE P-40:6|PE P-18:0_22:6 | -0.15 (1.04) | 0.05 (0.83) | 0.66 (0.26, 1.54) | 0.34 |
| DG 40:7|DG 18:1_22:6 | 0.18 (1.16) | -0.26 (0.54) | 1.60 (0.66, 5.02) | 0.35 |
| PC O-38:6a | -0.01 (0.82) | 0.28 (1.57) | 0.72 (0.32, 1.41) | 0.35 |
| TG O-55:10|TG O-15:0_20:5_20:5 | -0.14 (1.04) | 0.18 (1.06) | 0.72 (0.35, 1.41) | 0.35 |
| LPC 19:0/0:0 | 0.02 (1.01) | -0.08 (0.98) | 1.61 (0.62, 5.15) | 0.35 |
| PC 37:5|PC 17:1_20:4 | 0.03 (0.93) | -0.31 (1.09) | 1.45 (0.68, 3.47) | 0.35 |
| NAE 16:1 | 0.26 (1.58) | -0.19 (0.30) | 1.60 (0.76, 7.57) | 0.36 |
| HexCer 34:1;2O|HexCer 18:1;2O/16:0 | -0.12 (0.99) | 0.20 (1.18) | 0.72 (0.34, 1.43) | 0.36 |
| LPC 18:1/0:0 | -0.02 (1.05) | -0.15 (0.79) | 1.54 (0.65, 4.57) | 0.36 |
| LPC 20:0/0:0 | 0.10 (1.36) | -0.11 (0.58) | 1.67 (0.74, 8.63) | 0.36 |
| PC 36:4b | -0.15 (1.05) | 0.21 (1.05) | 0.73 (0.36, 1.42) | 0.36 |
| Cer 42:3;2O|Cer 18:2;2O/24:1 | -0.09 (0.82) | 0.21 (1.44) | 0.73 (0.35, 1.42) | 0.36 |
| PI 38:3 | 0.21 (1.04) | -0.09 (1.21) | 1.39 (0.70, 3.05) | 0.36 |
| NAE 21:0 | -0.30 (0.80) | -0.02 (0.82) | 0.65 (0.24, 1.63) | 0.36 |
| TG 50:4|TG 16:0_18:1_16:3 | 0.21 (1.25) | -0.09 (1.09) | 1.35 (0.72, 2.83) | 0.36 |
| CE 22:4 | -0.22 (0.61) | 0.06 (0.95) | 0.64 (0.22, 1.66) | 0.37 |
| DG 36:5|DG 18:2_18:3 | 0.10 (1.33) | -0.20 (0.45) | 1.51 (0.74, 5.48) | 0.37 |
| PE 36:4 | -0.16 (0.87) | 0.11 (0.76) | 0.66 (0.26, 1.60) | 0.37 |
| TG 50:4|TG 16:1_16:1_18:2 | 0.05 (0.94) | -0.17 (0.87) | 1.50 (0.63, 3.90) | 0.37 |
| CAR 13:0 | -0.10 (0.33) | 0.31 (1.88) | 0.62 (0.08, 1.23) | 0.37 |
| PC 40:7 | 0.02 (0.97) | 0.16 (1.32) | 0.69 (0.29, 1.54) | 0.37 |
| LPE 16:0 | -0.02 (0.86) | -0.11 (1.00) | 1.50 (0.63, 4.03) | 0.38 |
| PC 34:4|PC 14:0_20:4 | 0.09 (0.94) | -0.16 (1.13) | 1.39 (0.69, 3.16) | 0.38 |
| DG 37:7 | -0.24 (0.91) | 0.10 (1.01) | 0.72 (0.32, 1.49) | 0.38 |
| HexCer 42:3;3O | -0.16 (0.74) | 0.22 (1.34) | 0.73 (0.33, 1.45) | 0.38 |
| PE 34:3 | -0.11 (1.06) | 0.24 (1.04) | 0.73 (0.35, 1.47) | 0.39 |
| NAE 9:0 | 0.13 (1.22) | -0.06 (1.06) | 1.34 (0.70, 2.78) | 0.39 |
| PC O-44:4 | -0.16 (0.25) | -0.01 (0.79) | 0.54 (0.08, 2.03) | 0.39 |
| TG 47:2|TG 14:0_16:1_17:1 | 0.09 (0.97) | -0.12 (0.90) | 1.42 (0.65, 3.49) | 0.40 |
| DG 34:0 | -0.04 (0.72) | -0.20 (0.95) | 1.60 (0.57, 5.49) | 0.40 |
| DG 38:5 | 0.11 (1.26) | -0.18 (0.74) | 1.38 (0.67, 3.29) | 0.40 |
| TG 46:3|TG 10:0_18:1_18:2 | 0.23 (1.66) | -0.10 (0.35) | 1.49 (0.78, 7.67) | 0.40 |
| LPC O-24:0 | -0.19 (0.57) | 0.08 (1.71) | 0.76 (0.34, 1.44) | 0.40 |
| PE P-36:2|PE P-18:0_18:2 | -0.26 (0.85) | 0.06 (0.92) | 0.70 (0.29, 1.60) | 0.41 |
| TG 58:9|TG 18:1_20:4_20:4 | -0.01 (0.99) | 0.09 (0.64) | 0.69 (0.27, 1.66) | 0.41 |
| TG 54:3|TG 18:0_18:1_18:2 | -0.01 (0.87) | 0.11 (1.33) | 0.74 (0.35, 1.51) | 0.41 |
| PC 34:2 | -0.17 (0.97) | 0.13 (1.04) | 0.74 (0.35, 1.51) | 0.42 |
| PC 40:8|PC 20:4_20:4 | -0.20 (0.57) | 0.07 (1.19) | 0.68 (0.26, 1.69) | 0.42 |
| PC 35:2|PC 17:0_18:2 | -0.16 (0.82) | 0.09 (1.13) | 0.72 (0.31, 1.58) | 0.42 |
| PC O-30:1 | 0.05 (0.70) | -0.21 (0.95) | 1.49 (0.58, 4.23) | 0.42 |
| Cer 33:8;2O|Cer 15:3;2O/18:5 | -0.09 (0.76) | 0.20 (1.05) | 0.72 (0.31, 1.61) | 0.42 |
| TG 44:0|TG 12:0_14:0_18:0 | -0.13 (0.83) | 0.16 (1.08) | 0.70 (0.25, 1.64) | 0.43 |
| DG 50:1 | -0.15 (0.84) | 0.22 (1.25) | 0.73 (0.31, 1.54) | 0.43 |
| PE P-38:6|PE P-16:0_22:6 | -0.09 (1.01) | 0.06 (0.66) | 0.69 (0.26, 1.71) | 0.43 |
| NAE 20:0 | -0.25 (0.98) | 0.06 (1.05) | 0.75 (0.36, 1.52) | 0.43 |
| CAR 9:0 | -0.13 (0.80) | 0.14 (1.65) | 0.78 (0.37, 1.42) | 0.43 |
| PC 40:6|PC 18:0_22:6 | 0.28 (1.18) | -0.10 (1.04) | 1.35 (0.67, 3.16) | 0.43 |
| TG 42:1|TG 8:0_16:0_18:1 | -0.07 (0.86) | 0.23 (1.16) | 0.73 (0.31, 1.58) | 0.43 |
| LPC 16:0 | -0.01 (0.95) | -0.05 (0.90) | 1.42 (0.60, 3.66) | 0.44 |
| PE P-38:5|PE P-18:0_20:5 | -0.07 (1.21) | 0.17 (1.01) | 0.76 (0.35, 1.52) | 0.44 |
| SM 41:2;2O | -0.05 (0.78) | 0.16 (1.22) | 0.73 (0.32, 1.60) | 0.44 |
| PC 35:3|PC 17:1_18:2 | -0.19 (0.69) | -0.03 (1.25) | 0.72 (0.29, 1.67) | 0.44 |
| CAR 14:0 | 0.03 (0.93) | -0.17 (0.99) | 1.38 (0.61, 3.40) | 0.45 |
| CE 22:5 | 0.10 (0.91) | -0.07 (1.12) | 1.36 (0.62, 3.27) | 0.46 |
| SM 32:0;2O | 0.13 (0.92) | -0.10 (0.86) | 1.39 (0.60, 3.55) | 0.46 |
| LPC 18:2/0:0 | -0.18 (0.72) | -0.19 (0.61) | 1.62 (0.46, 6.35) | 0.46 |
| PE 38:6 | 0.04 (1.26) | 0.14 (0.93) | 0.78 (0.39, 1.53) | 0.47 |
| NAE 20:4 | 0.03 (0.95) | 0.34 (1.30) | 0.79 (0.40, 1.52) | 0.47 |
| NAE 5:0 | -0.33 (1.03) | 0.03 (0.95) | 0.76 (0.33, 1.60) | 0.47 |
| CE 18:2 | -0.17 (0.72) | 0.11 (1.18) | 0.75 (0.33, 1.63) | 0.48 |
| CAR 6:0 | 0.12 (0.98) | -0.20 (0.75) | 1.40 (0.58, 3.90) | 0.48 |
| SM 34:1;2O|SM 18:1;2O/16:0 | -0.12 (0.94) | 0.11 (1.09) | 0.77 (0.36, 1.59) | 0.48 |
| LPE 18:2 | -0.05 (1.03) | -0.13 (0.69) | 1.38 (0.59, 3.78) | 0.48 |
| CAR 18:1 | 0.02 (1.06) | -0.11 (0.88) | 1.33 (0.61, 3.23) | 0.49 |
| LPE 18:0 | -0.08 (0.93) | -0.13 (0.86) | 1.37 (0.57, 3.69) | 0.49 |
| NAGly 21:1;O | -0.25 (0.59) | -0.39 (0.55) | 1.59 (0.44, 6.48) | 0.49 |
| DG 40:2 | -0.17 (1.14) | 0.13 (0.98) | 0.79 (0.40, 1.54) | 0.49 |
| PC O-36:5a | 0.02 (1.02) | 0.20 (1.10) | 0.78 (0.37, 1.60) | 0.50 |
| TG 56:5|TG 16:0_18:0_22:5 | 0.09 (1.23) | -0.26 (0.53) | 1.44 (0.58, 5.01) | 0.50 |
| CAR 13:1 | -0.10 (0.97) | 0.16 (1.22) | 0.79 (0.38, 1.55) | 0.50 |
| CAR 5:0 | -0.03 (0.63) | -0.12 (0.70) | 1.58 (0.43, 6.76) | 0.50 |
| Carnitine | -0.27 (0.86) | 0.03 (1.00) | 0.76 (0.33, 1.67) | 0.50 |
| PC 34:3 | 0.09 (0.81) | -0.08 (0.82) | 1.37 (0.55, 3.70) | 0.50 |
| PC 39:5 | 0.08 (0.92) | -0.12 (1.31) | 1.28 (0.63, 2.82) | 0.51 |
| TG 60:8|TG 18:0_20:4_22:4 | 0.18 (1.33) | -0.18 (0.47) | 1.35 (0.58, 3.98) | 0.52 |
| CE 20:3 | 0.19 (1.01) | 0.02 (1.12) | 1.27 (0.61, 2.81) | 0.52 |
| NAE 20:2 | 0.22 (1.08) | 0.06 (0.91) | 1.28 (0.62, 2.87) | 0.52 |
| TG 50:0|TG 16:0_16:0_18:0 | -0.03 (0.84) | -0.16 (1.20) | 1.31 (0.59, 3.37) | 0.52 |
| PI 38:4b | 0.04 (1.05) | -0.16 (1.03) | 1.26 (0.63, 2.70) | 0.53 |
| TG 56:7|TG 16:0_18:1_22:6 | 0.26 (1.37) | -0.16 (0.53) | 1.29 (0.61, 3.25) | 0.53 |
| TG 48:0|TG 16:0_16:0_16:0 | -0.07 (0.87) | -0.18 (1.14) | 1.31 (0.58, 3.42) | 0.54 |
| Cer 37:1;3O|Cer 18:1;2O/19:0;O | -0.23 (0.68) | -0.09 (0.60) | 0.70 (0.21, 2.20) | 0.54 |
| MG 18:2 | 0.02 (1.22) | -0.19 (0.28) | 1.51 (0.63, 22.22) | 0.54 |
| NAE 28:0 | -0.22 (0.91) | 0.00 (1.08) | 0.79 (0.37, 1.65) | 0.54 |
| PC 35:6|PC 15:1_20:5 | 0.05 (1.27) | 0.13 (0.92) | 0.81 (0.41, 1.58) | 0.54 |
| TG 51:4|TG 15:0_18:2_18:2 | -0.03 (0.80) | -0.25 (0.82) | 1.38 (0.52, 4.32) | 0.54 |
| SM 40:2;2O|SM 18:2;2O/22:0 | -0.08 (0.62) | 0.08 (1.21) | 0.77 (0.31, 1.76) | 0.54 |
| NAGly 24:6 | -0.08 (0.81) | 0.16 (1.03) | 0.78 (0.34, 1.75) | 0.54 |
| TG 53:3|TG 17:0_18:1_18:2 | 0.08 (1.06) | -0.24 (0.78) | 1.32 (0.56, 3.54) | 0.54 |
| PE P-40:7|PE P-18:1_22:6 | -0.09 (1.01) | 0.06 (0.82) | 0.76 (0.29, 1.85) | 0.54 |
| Cer 41:0;2O|Cer 18:0;2O/23:0 | 0.01 (0.76) | -0.19 (0.72) | 1.35 (0.51, 3.75) | 0.55 |
| TG 52:5|TG 16:0_18:2_18:3 | 0.03 (1.12) | -0.18 (0.76) | 1.27 (0.60, 3.22) | 0.55 |
| PC 40:5 | 0.23 (1.09) | 0.11 (1.15) | 1.23 (0.63, 2.50) | 0.55 |
| PI 38:6 | 0.12 (0.95) | 0.34 (1.32) | 0.81 (0.39, 1.59) | 0.55 |
| SM 45:2;3O | -0.04 (1.11) | -0.19 (0.73) | 1.28 (0.58, 3.13) | 0.55 |
| NAE 16:0 | -0.17 (0.88) | 0.07 (0.96) | 0.79 (0.35, 1.73) | 0.56 |
| TG 56:7|TG 18:1_18:2_20:4 | -0.16 (1.18) | -0.02 (1.05) | 0.82 (0.41, 1.57) | 0.56 |
| LPC 20:1/0:0 | 0.10 (1.59) | -0.01 (0.59) | 1.21 (0.65, 3.20) | 0.56 |
| TG 54:4|TG 18:1_18:1_18:2 | -0.09 (0.89) | 0.03 (1.13) | 0.81 (0.38, 1.67) | 0.56 |
| TG 52:7|TG 14:0_18:3_20:4 | -0.04 (0.82) | 0.09 (1.38) | 0.82 (0.40, 1.67) | 0.57 |
| PC O-38:7 | -0.09 (0.86) | 0.19 (1.18) | 0.80 (0.36, 1.71) | 0.57 |
| NAGly 17:1 | -0.16 (1.02) | 0.08 (1.01) | 0.82 (0.40, 1.65) | 0.57 |
| PC 36:6 | 0.01 (0.62) | 0.08 (1.64) | 0.82 (0.37, 1.69) | 0.57 |
| TG 54:7|TG 18:2_18:2_18:3 | 0.01 (1.28) | -0.14 (0.58) | 1.23 (0.61, 3.28) | 0.57 |
| PC O-37:8 | -0.26 (0.94) | -0.02 (0.92) | 0.80 (0.35, 1.75) | 0.57 |
| NAE 18:1 | -0.02 (1.02) | 0.22 (1.32) | 0.84 (0.45, 1.58) | 0.58 |
| PI 36:2 | -0.02 (0.85) | 0.22 (1.28) | 0.81 (0.37, 1.68) | 0.58 |
| PE P-38:5|PE P-18:1_20:4 | -0.15 (0.82) | -0.14 (0.55) | 1.35 (0.46, 4.26) | 0.58 |
| TG 56:8|TG 16:0_18:2_22:6 | 0.20 (1.34) | -0.16 (0.62) | 1.26 (0.60, 3.41) | 0.58 |
| TG 52:4|TG 16:0_18:1_18:3 | -0.14 (1.03) | 0.06 (1.13) | 0.83 (0.42, 1.61) | 0.58 |
| TG 46:2|TG 14:0_16:1_16:1 | -0.06 (0.84) | 0.20 (1.28) | 0.82 (0.38, 1.69) | 0.59 |
| SM 33:0;2O | -0.05 (0.93) | 0.12 (1.15) | 0.83 (0.40, 1.66) | 0.59 |
| SM 34:2;3O | -0.06 (0.79) | 0.06 (1.22) | 0.82 (0.36, 1.69) | 0.59 |
| Cer 43:2;2O|Cer 19:1;2O/24:1 | -0.14 (0.87) | 0.09 (1.34) | 0.83 (0.40, 1.63) | 0.59 |
| PC 32:0|PC 16:0_16:0 | -0.03 (0.94) | -0.21 (0.88) | 1.28 (0.54, 3.38) | 0.59 |
| PC 38:6b | -0.02 (1.06) | 0.09 (1.05) | 0.82 (0.39, 1.69) | 0.59 |
| PC 38:4|PC 18:1_20:3 | 0.14 (1.00) | -0.07 (1.17) | 1.21 (0.60, 2.62) | 0.59 |
| TG 52:1|TG 16:0_18:0_18:1 | -0.03 (0.68) | -0.17 (1.08) | 1.30 (0.50, 3.74) | 0.59 |
| PC O-38:5a | -0.15 (0.69) | 0.03 (1.24) | 0.82 (0.38, 1.73) | 0.60 |
| PC 36:3 | 0.16 (1.04) | 0.01 (1.17) | 1.21 (0.59, 2.61) | 0.60 |
| PC O-34:3 | -0.12 (0.66) | 0.00 (0.99) | 0.78 (0.30, 1.98) | 0.60 |
| DG O-37:2|DG O-21:1_16:1 | -0.16 (0.82) | -0.02 (0.69) | 0.79 (0.31, 2.05) | 0.61 |
| NAE 17:0 | -0.16 (0.89) | 0.03 (0.99) | 0.82 (0.37, 1.75) | 0.61 |
| DG 40:8|DG 18:2_22:6 | 0.08 (1.05) | -0.17 (0.53) | 1.29 (0.52, 4.02) | 0.61 |
| TG 50:4|TG 16:0_16:2_18:2 | 0.00 (0.87) | -0.16 (0.96) | 1.25 (0.53, 3.33) | 0.61 |
| Cer 38:1;2O|Cer 18:1;2O/20:0 | -0.14 (0.92) | 0.07 (1.25) | 0.84 (0.41, 1.68) | 0.62 |
| TG 55:3|TG 18:0_19:1_18:2 | -0.02 (0.97) | -0.01 (1.14) | 0.83 (0.38, 1.80) | 0.62 |
| NAGly 20:1;O | -0.13 (1.07) | 0.07 (1.04) | 0.85 (0.42, 1.67) | 0.63 |
| TG 54:5|TG 18:1_18:2_18:2 | -0.13 (0.85) | 0.01 (1.04) | 0.83 (0.37, 1.80) | 0.63 |
| PC 36:4|PC 16:0_20:4 | -0.15 (0.95) | -0.29 (0.71) | 1.23 (0.53, 3.05) | 0.63 |
| PE P-38:4|PE P-18:0_20:4 | -0.25 (0.87) | -0.06 (0.95) | 0.83 (0.37, 1.83) | 0.64 |
| PC 38:5|PC 18:1_20:4 | -0.10 (0.80) | -0.23 (0.95) | 1.23 (0.51, 3.16) | 0.64 |
| PC 42:7|PC 20:1_22:6 | 0.07 (1.15) | 0.15 (1.22) | 0.84 (0.39, 1.79) | 0.65 |
| DG 40:5 | 0.02 (0.88) | 0.10 (1.18) | 0.83 (0.34, 1.96) | 0.65 |
| PC 38:6|PC 18:2_20:4 | -0.16 (0.70) | -0.05 (1.08) | 0.81 (0.32, 2.05) | 0.65 |
| PC 38:6a | -0.10 (0.67) | 0.01 (1.11) | 0.81 (0.32, 2.03) | 0.65 |
| NAE 27:0 | -0.27 (0.85) | -0.10 (0.80) | 0.82 (0.33, 2.01) | 0.66 |
| PC O-36:5b | -0.15 (0.79) | -0.01 (1.16) | 0.85 (0.39, 1.81) | 0.66 |
| DG 31:0 | -0.05 (0.83) | -0.19 (0.80) | 1.22 (0.50, 3.18) | 0.66 |
| TG 49:0|TG 16:0_16:0_17:0 | 0.00 (1.04) | -0.13 (0.92) | 1.19 (0.56, 3.14) | 0.67 |
| CAR 4:0 | 0.03 (0.98) | -0.04 (1.22) | 1.16 (0.59, 2.42) | 0.67 |
| Cer 40:0;2O|Cer 18:0;2O/22:0 | 0.02 (0.82) | -0.13 (0.86) | 1.22 (0.50, 3.17) | 0.67 |
| DG 51:6 | -0.11 (0.84) | -0.16 (1.11) | 1.20 (0.53, 3.03) | 0.67 |
| TG 58:7|TG 18:0_20:3_20:4 | -0.06 (1.10) | 0.00 (0.84) | 0.85 (0.38, 1.90) | 0.67 |
| TG 54:0|TG 16:0_16:0_22:0 | -0.10 (0.97) | 0.04 (0.89) | 0.85 (0.37, 1.89) | 0.67 |
| TG 46:2|TG 12:0_16:0_18:2 | -0.02 (0.93) | 0.21 (1.31) | 0.86 (0.42, 1.71) | 0.67 |
| PE P-36:3|PE P-18:1_18:2 | -0.11 (1.07) | -0.09 (0.57) | 1.20 (0.50, 3.05) | 0.68 |
| TG 60:10|TG 18:0_20:4_22:6 | 0.17 (1.26) | -0.16 (0.54) | 1.21 (0.53, 3.33) | 0.68 |
| PC O-34:5 | -0.10 (1.14) | -0.07 (0.79) | 0.85 (0.40, 1.84) | 0.68 |
| DG 27:2 | 0.06 (0.89) | 0.12 (0.87) | 0.84 (0.36, 1.95) | 0.68 |
| PC 37:6a | 0.14 (1.13) | -0.07 (1.20) | 1.17 (0.57, 2.58) | 0.68 |
| TG 52:3|TG 16:0_18:1_18:2 | 0.04 (1.02) | -0.16 (0.91) | 1.18 (0.54, 2.82) | 0.68 |
| DG 25:1 | 0.11 (0.96) | 0.01 (0.88) | 1.18 (0.53, 2.75) | 0.68 |
| TG 58:9|TG 18:1_18:2_22:6 | 0.09 (1.21) | 0.03 (0.76) | 0.85 (0.39, 1.87) | 0.68 |
| TG O-50:2|TG O-16:0_16:0_18:2 | -0.10 (0.70) | 0.08 (0.94) | 0.82 (0.29, 2.17) | 0.68 |
| PC O-40:6 | -0.14 (0.78) | -0.07 (1.05) | 0.84 (0.36, 1.95) | 0.69 |
| PC 38:5|PC 16:0_22:5 | 0.17 (0.84) | -0.01 (1.24) | 1.18 (0.53, 2.85) | 0.69 |
| Cer 40:1;2O|Cer 18:1;2O/22:0 | -0.17 (0.72) | 0.01 (1.18) | 0.86 (0.38, 1.87) | 0.70 |
| TG 58:10|TG 16:0_20:4_22:6 | 0.09 (1.15) | -0.19 (0.48) | 1.21 (0.49, 3.75) | 0.70 |
| LPC 20:5/0:0 | 0.10 (0.79) | -0.03 (1.23) | 1.17 (0.54, 2.74) | 0.70 |
| Cer 42:0;2O|Cer 18:0;2O/24:0 | -0.03 (0.71) | -0.13 (0.91) | 1.20 (0.47, 3.10) | 0.70 |
| TG 52:6|TG 16:0_18:2_18:4 | 0.11 (0.82) | -0.09 (1.52) | 1.15 (0.60, 2.62) | 0.70 |
| TG 58:6|TG 18:2_20:2_20:2 | 0.07 (1.22) | -0.20 (0.75) | 1.17 (0.54, 2.82) | 0.70 |
| SM 38:3;2O|SM 23:1;2O/15:2 | -0.04 (1.10) | -0.03 (0.82) | 0.87 (0.40, 1.94) | 0.71 |
| TG 51:4|TG 18:0_15:2_18:2 | -0.02 (0.86) | -0.15 (1.00) | 1.17 (0.52, 2.80) | 0.71 |
| TG 58:8|TG 18:1_18:2_22:5 | 0.15 (1.33) | 0.03 (0.70) | 0.87 (0.41, 1.89) | 0.71 |
| TG 60:11|TG 18:2_20:4_22:5 | 0.07 (1.14) | -0.04 (0.74) | 0.86 (0.37, 2.03) | 0.71 |
| DG 36:4|DG 18:2_18:2 | -0.07 (0.83) | -0.19 (0.71) | 1.21 (0.44, 3.75) | 0.71 |
| PC 35:4|PC 17:2_18:2 | -0.05 (1.04) | -0.19 (0.53) | 1.18 (0.49, 2.96) | 0.71 |
| PE P-40:6|PE P-18:2_22:4 | -0.17 (0.83) | -0.03 (0.72) | 0.84 (0.31, 2.20) | 0.71 |
| TG 50:5|TG 14:0_18:2_18:3 | 0.02 (1.34) | -0.07 (0.81) | 1.12 (0.59, 2.44) | 0.72 |
| Cer 36:1;2O|Cer 18:1;2O/18:0 | -0.02 (1.12) | -0.19 (0.73) | 1.16 (0.51, 2.96) | 0.73 |
| NAGly 22:3;O | -0.09 (1.01) | 0.07 (0.83) | 0.87 (0.37, 1.93) | 0.73 |
| PC 34:3|PC 16:1_18:2 | -0.10 (0.64) | -0.12 (1.03) | 0.83 (0.29, 2.41) | 0.73 |
| DG 38:6|DG 18:2_20:4 | -0.02 (1.04) | -0.14 (0.85) | 1.16 (0.51, 2.94) | 0.73 |
| SM 36:2;2O|SM 15:1;2O/21:1 | 0.08 (1.07) | -0.12 (0.78) | 1.15 (0.53, 2.71) | 0.73 |
| TG 53:5|TG 17:1_18:2_18:2 | -0.10 (0.72) | -0.10 (1.10) | 0.86 (0.35, 2.11) | 0.74 |
| DG 51:9 | -0.02 (0.83) | 0.11 (1.20) | 0.89 (0.42, 1.84) | 0.74 |
| PC O-30:0 | -0.05 (0.78) | -0.14 (0.95) | 1.17 (0.44, 3.15) | 0.74 |
| TG 47:0|TG 14:0_16:0_17:0 | -0.01 (1.09) | -0.09 (0.84) | 1.14 (0.54, 2.92) | 0.74 |
| SM 34:2;2O|SM 18:1;2O/16:1 | -0.05 (0.94) | -0.24 (0.90) | 1.14 (0.51, 2.72) | 0.75 |
| PC 36:5 | 0.10 (0.90) | 0.09 (1.25) | 0.88 (0.40, 1.97) | 0.75 |
| PC O-38:5b | -0.12 (0.76) | -0.02 (0.93) | 0.87 (0.35, 2.13) | 0.75 |
| TG 48:3|TG 16:0_14:1_18:2 | -0.01 (0.86) | 0.13 (1.16) | 0.89 (0.41, 1.87) | 0.75 |
| NAE 22:5 | 0.14 (1.08) | 0.07 (0.97) | 1.12 (0.56, 2.40) | 0.75 |
| NAE 21:4 | -0.11 (0.96) | 0.03 (0.74) | 0.87 (0.35, 2.06) | 0.75 |
| TG 52:7|TG 18:2_18:2_16:3 | 0.08 (0.88) | -0.08 (1.26) | 1.13 (0.54, 2.56) | 0.75 |
| TG 56:4|TG 18:1_20:1_18:2 | -0.01 (1.05) | 0.04 (0.93) | 0.89 (0.43, 1.84) | 0.75 |
| Cer 34:1;2O|Cer 18:1;2O/16:0 | -0.22 (1.00) | -0.14 (0.97) | 0.89 (0.41, 1.95) | 0.76 |
| LPC 18:2 | -0.14 (0.76) | -0.07 (0.62) | 1.19 (0.38, 3.81) | 0.76 |
| PI 40:6 | 0.13 (1.05) | 0.18 (1.18) | 0.90 (0.45, 1.84) | 0.77 |
| PC 38:6|PC 16:0_22:6 | 0.10 (1.14) | -0.08 (1.02) | 1.12 (0.54, 2.41) | 0.77 |
| NAE 18:0 | -0.14 (0.96) | -0.04 (1.01) | 0.90 (0.43, 1.88) | 0.77 |
| TG 46:1|TG 12:0_16:0_18:1 | -0.02 (0.87) | 0.13 (1.15) | 0.89 (0.39, 2.00) | 0.77 |
| TG 54:1|TG 16:0_20:0_18:1 | -0.09 (0.86) | 0.00 (1.08) | 0.90 (0.41, 2.01) | 0.78 |
| TG 55:7|TG 15:0_18:2_22:5 | 0.11 (1.23) | -0.01 (0.99) | 0.91 (0.44, 1.95) | 0.79 |
| SM 33:1;2O|SM 17:1;2O/16:0 | -0.15 (0.87) | -0.02 (1.12) | 0.90 (0.41, 1.96) | 0.79 |
| TG 54:7|TG 16:0_18:3_20:4 | 0.17 (0.98) | -0.04 (1.16) | 1.10 (0.53, 2.38) | 0.79 |
| TG 56:5|TG 18:0_18:1_20:4 | -0.01 (1.23) | -0.06 (0.76) | 0.91 (0.43, 1.97) | 0.79 |
| Cer 40:2;2O|Cer 18:2;2O/22:0 | -0.09 (0.72) | -0.14 (1.13) | 1.12 (0.49, 2.62) | 0.79 |
| TG 44:2|TG 12:0_16:1_16:1 | -0.02 (1.13) | 0.18 (1.16) | 0.92 (0.47, 1.75) | 0.79 |
| PC 37:6|PC 17:2_20:4 | 0.17 (1.36) | -0.11 (0.67) | 1.10 (0.55, 2.56) | 0.80 |
| PC O-38:6b | -0.08 (0.89) | -0.07 (0.82) | 0.90 (0.38, 2.15) | 0.80 |
| TG 54:6|TG 16:0_18:2_20:4 | -0.02 (0.95) | -0.13 (0.82) | 1.12 (0.46, 2.87) | 0.80 |
| DG O-35:2|DG O-21:1_14:1 | -0.13 (0.79) | -0.09 (0.49) | 0.87 (0.30, 2.81) | 0.80 |
| CE 18:1 | -0.05 (0.77) | 0.02 (1.02) | 0.90 (0.37, 2.14) | 0.80 |
| TG 56:7|TG 16:0_18:2_22:5 | -0.08 (0.88) | -0.13 (1.05) | 0.90 (0.38, 2.16) | 0.80 |
| TG 53:6|TG 15:0_18:2_20:4 | 0.03 (0.77) | -0.16 (1.10) | 1.12 (0.47, 2.85) | 0.81 |
| PC 34:3|PC 16:0_18:3 | 0.02 (0.85) | -0.03 (0.84) | 1.11 (0.46, 2.80) | 0.81 |
| PI 38:5 | 0.06 (1.20) | 0.12 (0.94) | 1.09 (0.52, 2.34) | 0.81 |
| PC O-40:7 | 0.18 (1.15) | 0.01 (1.12) | 1.09 (0.53, 2.37) | 0.82 |
| TG 45:1|TG 12:0_15:0_18:1 | -0.01 (0.90) | -0.03 (0.84) | 1.10 (0.46, 2.86) | 0.83 |
| PE 36:1|PE 18:0_18:1 | -0.06 (0.89) | 0.06 (1.10) | 0.92 (0.41, 2.03) | 0.83 |
| SM 32:1;2O | -0.03 (1.00) | -0.15 (0.93) | 1.09 (0.49, 2.49) | 0.83 |
| TG 60:11|TG 18:1_20:4_22:6 | 0.10 (1.22) | -0.04 (0.66) | 0.92 (0.42, 2.16) | 0.83 |
| CE 16:0 | -0.06 (0.78) | 0.02 (1.06) | 0.92 (0.40, 2.08) | 0.84 |
| PC 37:4 | -0.16 (0.99) | -0.21 (0.94) | 1.08 (0.51, 2.38) | 0.84 |
| Cer 42:2;2O|Cer 18:2;2O/24:0 | -0.16 (0.68) | -0.06 (1.12) | 0.92 (0.39, 2.20) | 0.85 |
| TG 54:6|TG 18:1_18:2_18:3 | -0.06 (1.01) | -0.10 (0.82) | 1.08 (0.49, 2.50) | 0.85 |
| PE P-34:2|PE P-16:0_18:2 | -0.18 (0.91) | -0.01 (0.83) | 0.92 (0.38, 2.19) | 0.85 |
| PC 40:7|PC 18:1_22:6 | 0.06 (1.12) | 0.02 (1.19) | 0.93 (0.42, 2.05) | 0.85 |
| LPC 20:5 | 0.12 (0.69) | 0.05 (1.28) | 1.08 (0.50, 2.51) | 0.85 |
| DG 23:1 | -0.01 (0.90) | 0.00 (0.73) | 0.92 (0.37, 2.30) | 0.86 |
| NAE 14:1 | -0.01 (1.14) | -0.01 (0.78) | 1.07 (0.51, 2.32) | 0.86 |
| PC 37:1 | -0.05 (0.88) | -0.02 (0.98) | 0.92 (0.38, 2.23) | 0.86 |
| DG 27:0 | 0.02 (0.91) | -0.01 (1.15) | 1.07 (0.52, 2.24) | 0.86 |
| DG 48:11 | -0.13 (1.05) | -0.07 (0.80) | 0.94 (0.43, 2.01) | 0.87 |
| CAR 10:0 | 0.09 (0.94) | -0.03 (0.96) | 1.07 (0.49, 2.45) | 0.87 |
| PC 42:8 | 0.12 (0.95) | 0.02 (1.17) | 1.07 (0.46, 2.51) | 0.87 |
| TG 53:1|TG 17:0_18:0_18:1 | -0.03 (0.81) | -0.09 (0.97) | 1.07 (0.45, 2.72) | 0.87 |
| NAE 6:0 | -0.12 (0.61) | -0.16 (0.51) | 1.11 (0.29, 4.43) | 0.88 |
| SM 35:2;2O|SM 14:1;2O/21:1 | -0.03 (0.93) | -0.08 (1.08) | 0.94 (0.41, 2.24) | 0.88 |
| DG 36:4 | -0.07 (1.02) | -0.09 (0.90) | 1.06 (0.46, 2.51) | 0.88 |
| PC 37:6b | -0.04 (1.07) | 0.01 (0.91) | 0.95 (0.45, 1.99) | 0.88 |
| TG 44:2|TG 10:0_16:0_18:2 | 0.06 (1.34) | 0.12 (0.97) | 1.04 (0.55, 2.02) | 0.89 |
| SM 34:2;2O|SM 18:2;2O/16:0 | -0.05 (0.91) | -0.17 (0.89) | 1.06 (0.45, 2.56) | 0.89 |
| PC 33:2|PC 15:0_18:2 | -0.16 (0.80) | -0.11 (0.95) | 0.94 (0.40, 2.21) | 0.89 |
| DG 40:3 | 0.07 (1.03) | 0.07 (1.12) | 1.05 (0.51, 2.23) | 0.89 |
| TG 46:0|TG 12:0_16:0_18:0 | -0.08 (0.92) | 0.01 (0.99) | 0.95 (0.40, 2.31) | 0.89 |
| Cer 43:1;2O|Cer 19:1;2O/24:0 | -0.17 (0.77) | -0.13 (1.03) | 1.06 (0.46, 2.44) | 0.89 |
| TG 54:6|TG 16:0_18:1_20:5 | -0.03 (1.09) | -0.10 (0.84) | 1.06 (0.47, 2.42) | 0.89 |
| Cer 39:1;2O|Cer 16:1;2O/23:0 | -0.07 (0.81) | 0.02 (1.25) | 0.96 (0.47, 1.95) | 0.90 |
| PC 28:0|PC 14:0_14:0 | 0.09 (0.85) | 0.21 (1.59) | 0.96 (0.49, 1.79) | 0.90 |
| Cer 41:2;2O|Cer 18:2;2O/23:0 | -0.02 (0.80) | -0.04 (1.38) | 1.05 (0.51, 2.25) | 0.90 |
| SM 33:1;2O | -0.10 (0.83) | -0.02 (1.13) | 0.95 (0.44, 2.08) | 0.90 |
| DG 38:6 | -0.05 (1.09) | -0.01 (0.90) | 0.95 (0.42, 2.18) | 0.91 |
| TG 48:0|TG 14:0_16:0_18:0 | -0.08 (0.87) | -0.08 (1.16) | 1.05 (0.48, 2.54) | 0.91 |
| CE 20:5 | 0.12 (1.02) | 0.02 (1.13) | 1.05 (0.47, 2.61) | 0.91 |
| TG 44:1|TG 12:0_14:0_18:1 | -0.01 (0.91) | 0.10 (1.02) | 0.96 (0.42, 2.18) | 0.91 |
| TG 48:3|TG 12:0_18:1_18:2 | 0.03 (1.09) | 0.12 (1.15) | 0.97 (0.48, 1.89) | 0.92 |
| TG 54:2|TG 18:0_18:1_18:1 | 0.04 (0.92) | -0.09 (0.93) | 1.05 (0.41, 2.72) | 0.93 |
| PC O-36:4 | -0.04 (0.78) | 0.00 (1.18) | 1.04 (0.48, 2.29) | 0.93 |
| TG 55:4|TG 18:1_19:1_18:2 | -0.09 (0.84) | -0.21 (0.99) | 1.04 (0.46, 2.43) | 0.93 |
| SM 36:1;2O|SM 18:1;2O/18:0 | 0.00 (1.07) | -0.05 (0.79) | 0.97 (0.45, 2.22) | 0.93 |
| PC 38:7|PC 16:1_22:6 | 0.12 (1.03) | -0.03 (1.34) | 1.03 (0.49, 2.25) | 0.93 |
| PE 36:4|PE 18:2_18:2 | -0.09 (1.17) | -0.01 (0.82) | 1.03 (0.51, 2.10) | 0.93 |
| CE 22:6 | 0.11 (1.16) | 0.04 (1.13) | 1.03 (0.52, 2.11) | 0.93 |
| PE P-40:4|PE P-20:0_20:4 | -0.11 (1.09) | -0.04 (1.06) | 1.03 (0.52, 2.11) | 0.93 |
| TG 45:0|TG 14:0_15:0_16:0 | -0.06 (1.04) | -0.06 (0.67) | 1.04 (0.45, 2.82) | 0.93 |
| TG 52:4|TG 16:1_18:1_18:2 | -0.07 (0.96) | -0.11 (0.96) | 0.97 (0.43, 2.32) | 0.94 |
| SM 35:2;2O | -0.06 (1.08) | -0.11 (1.01) | 0.97 (0.48, 2.00) | 0.94 |
| TG 54:5|TG 16:0_18:2_20:3 | -0.02 (1.05) | 0.01 (1.05) | 0.97 (0.48, 1.98) | 0.94 |
| DG 40:8 | 0.03 (1.07) | -0.09 (0.66) | 1.03 (0.44, 2.77) | 0.94 |
| PC 32:2|PC 14:0_18:2 | -0.01 (0.85) | -0.03 (1.10) | 1.03 (0.45, 2.41) | 0.94 |
| PI 34:2 | 0.15 (1.07) | 0.24 (1.14) | 1.02 (0.51, 2.05) | 0.95 |
| CAR 20:1 | -0.13 (0.73) | -0.03 (1.24) | 0.98 (0.42, 2.24) | 0.95 |
| PC 36:5|PC 16:0_20:5 | 0.10 (0.89) | -0.02 (1.22) | 1.02 (0.47, 2.47) | 0.96 |
| TG 58:4|TG 18:1_22:1_18:2 | 0.12 (1.48) | 0.02 (0.54) | 1.02 (0.53, 2.28) | 0.96 |
| PC 38:5 | 0.18 (0.96) | 0.11 (1.12) | 1.02 (0.48, 2.23) | 0.96 |
| PC 39:6 | 0.13 (1.16) | 0.06 (1.09) | 1.02 (0.49, 2.14) | 0.96 |
| PE P-36:4|PE P-16:0_20:4 | -0.17 (0.86) | -0.10 (0.74) | 1.02 (0.42, 2.55) | 0.96 |
| SM 35:2;2O|SM 17:2;2O/18:0 | 0.01 (1.05) | -0.09 (0.90) | 0.98 (0.42, 2.38) | 0.97 |
| TG 58:7|TG 18:1_18:2_22:4 | 0.00 (1.02) | -0.18 (0.86) | 0.98 (0.37, 2.59) | 0.97 |
| SM 47:6;3O | -0.06 (1.00) | -0.07 (0.91) | 0.99 (0.45, 2.26) | 0.97 |
| CE 20:4 | -0.11 (0.93) | -0.09 (0.85) | 0.99 (0.44, 2.23) | 0.98 |
| TG 51:0|TG 16:0_17:0_18:0 | -0.02 (1.07) | -0.01 (1.09) | 0.99 (0.49, 2.13) | 0.98 |
| TG 53:4|TG 17:1_18:1_18:2 | -0.05 (0.87) | -0.16 (1.02) | 0.99 (0.43, 2.38) | 0.98 |
| Cer 42:1;2O|Cer 18:0;2O/24:1 | 0.06 (1.07) | -0.07 (0.81) | 1.01 (0.45, 2.55) | 0.98 |
| PC 40:6 | -0.03 (0.83) | -0.05 (1.27) | 0.99 (0.41, 2.46) | 0.98 |
| Cer 42:1;2O|Cer 18:1;2O/24:0 | -0.15 (0.57) | -0.09 (0.96) | 1.01 (0.38, 2.71) | 0.99 |
| DG 25:2 | 0.06 (0.97) | 0.06 (0.94) | 1.01 (0.46, 2.24) | 0.99 |
| TG 56:4|TG 18:1_18:1_20:2 | -0.25 (0.64) | -0.29 (0.45) | 1.01 (0.27, 4.06) | 0.99 |
| PC 37:4|PC 17:0_20:4 | -0.14 (0.91) | -0.14 (0.95) | 1.00 (0.45, 2.25) | 0.99 |
| Cer 41:1;2O|Cer 18:1;2O/23:0 | -0.10 (0.70) | -0.07 (1.19) | 1.00 (0.46, 2.20) | 0.99 |
| DG 34:3 | -0.03 (0.85) | 0.02 (0.98) | 1.00 (0.42, 2.42) | 1.00 |
| TG 56:3|TG 18:1_18:1_20:1 | 0.16 (1.22) | 0.06 (0.92) | 1.00 (0.52, 2.01) | 1.00 |
| TG 60:10|TG 18:1_20:4_22:5 | 0.10 (1.12) | -0.12 (0.89) | 1.00 (0.43, 2.36) | 1.00 |

1Odd ratios (OR) and 95% confidence intervals of clinical benefit (no benefit as the reference) were estimated using logistic regression models of the z-scored transformed and normalized lipids. Statistical significance is considered at an alpha level 0.0001 after adjusting for multiple testing using the Bonferroni method. Logistic regression models were adjusted for sex, age at diagnosis, BMI (kg/m2), additional treatment (chemotherapy, radiation, or targeted therapy), Bristol Stool type, antibiotic use two months prior to collection, PPI use, and probiotic use.
