# Supplementary material for: Metagenomic and Metabolomic Correlates of Immunotherapy Response in Non-Small Cell Lung Cancer
Source: Research Square preprint supplement (doi:10.21203/rs.3.rs-10107631/v1), 2026-07-09
Supplement: Supplementary file 6 [file ec2d347fdd8e4a7df997e09b.docx]

**Supplementary Table 7. Abbreviations of the strongest metabolites and lipids correlated with microbial species presented in heat maps among patients diagnosed with NSCLC at Moffitt Cancer Center.**

| Original | Abbreviation | Data |
| --- | --- | --- |
| Akkermansia muciniphila | A. muciniphila | Microbiome |
| Alistipes putredinis | A. putredinis | Microbiome |
| Bifidobacterium longum | B. longum | Microbiome |
| Prevotella copri | P. copri | Microbiome |
| Alistipes finegoldii | A. finegoldii | Microbiome |
| Alistipes shahii | A. shahii | Microbiome |
| Anaerostipes hadrus | A. hadrus | Microbiome |
| Anaerotruncus colihominis | A. colihominis | Microbiome |
| Bacteroides caccae | B. caccae | Microbiome |
| Bacteroides cellulosilyticus | B. cellulosilyticus | Microbiome |
| Bacteroides ovatus | B. ovatus | Microbiome |
| Bacteroides stercoris | B. stercoris | Microbiome |
| Bacteroides thetaiotaomicron | B. thetaiotaomicron | Microbiome |
| Bacteroides vulgatus | B. vulgatus | Microbiome |
| Bacteroides xylanisolvens | B. xylanisolvens | Microbiome |
| Blautia obeum | B. obeum | Microbiome |
| Blautia producta | B. producta | Microbiome |
| Blautia sp CAG 257 | B. sp CAG 257 | Microbiome |
| Blautia wexlerae | B. wexlerae | Microbiome |
| Clostridium bolteae | C. bolteae | Microbiome |
| Clostridium clostridioforme | C. clostridioforme | Microbiome |
| Clostridium innocuum | C. innocuum | Microbiome |
| Clostridium leptum | C. leptum | Microbiome |
| Clostridium sp CAG 58 | C. sp CAG 58 | Microbiome |
| Clostridium symbiosum | C. symbiosum | Microbiome |
| Collinsella aerofaciens | C. aerofaciens | Microbiome |
| Collinsella stercoris | C. stercoris | Microbiome |
| Dorea sp CAG 317 | D. sp CAG 317 | Microbiome |
| Eggerthella lenta | E. lenta | Microbiome |
| Eisenbergiella massiliensis | E. massiliensis | Microbiome |
| Eisenbergiella tayi | E. tayi | Microbiome |
| Erysipelatoclostridium ramosum | E. ramosum | Microbiome |
| Escherichia coli | E. coli | Microbiome |
| Eubacterium hallii | E. hallii | Microbiome |
| Eubacterium rectale | E. rectale | Microbiome |
| Faecalibacterium prausnitzii | F. prausnitzii | Microbiome |
| Flavonifractor plautii | F. plautii | Microbiome |
| Fusicatenibacter saccharivorans | F. saccharivorans | Microbiome |
| Hungatella hathewayi | H. hathewayi | Microbiome |
| Intestinimonas butyriciproducens | I. butyriciproducens | Microbiome |
| Lawsonibacter asaccharolyticus | L. asaccharolyticus | Microbiome |
| Odoribacter splanchnicus | O. splanchnicus | Microbiome |
| Parabacteroides distasonis | P. distasonis | Microbiome |
| Parabacteroides merdae | P. merdae | Microbiome |
| Roseburia faecis | R. faecis | Microbiome |
| Roseburia hominis | R. hominis | Microbiome |
| Roseburia intestinalis | R. intestinalis | Microbiome |
| Roseburia inulinivorans | R. inulinivorans | Microbiome |
| Ruminococcus gnavus | R. gnavus | Microbiome |
| Ruminococcus torques | R. torques | Microbiome |
| Ruthenibacterium lactatiformans | R. lactatiformans | Microbiome |
| Sellimonas intestinalis | S. intestinalis | Microbiome |
| Streptococcus salivarius | S. salivarius | Microbiome |
| 4 Imidazoleacetate | 4-IA | Metabolites |
| 3 Indoxyl sulfate | 3-IS | Metabolites |
| 6 Bromotryptophan | 6-BrTrp | Metabolites |
| 3 5 Dichloro 2 6 Dihydroxybenzoic acid | 3,5-DCl-2,6-DHBA | Metabolites |
| Fructose | Fru | Metabolites |
| Betaine | Bet | Metabolites |
| N n dimethylalanine | DMAla | Metabolites |
| 4 Methyl 2 Oxopentanoate | 4MOP | Metabolites |
| 1 Carboxyethylisoleucine | CE-Ile | Metabolites |
| Alpha ketobutyrate | Î±-KB | Metabolites |
| Gamma glutamylhistidine | Î³-Glu-His | Metabolites |
| Xylose | Xyl | Metabolites |
| Caproate 6 0 | C6 | Metabolites |
| Glutarate C5 Dc | C5DC | Metabolites |
| Trans 2 Hexenoylglycine | t2HGly | Metabolites |
| Stearoylcarnitine C18 | C18 | Metabolites |
| Adipoylcarnitine C6 Dc | C6DC | Metabolites |
| 3 Hydroxybutyrate Bhba | BHBA | Metabolites |
| 3 Hydroxyoctanoate | 3OH-Oct | Metabolites |
| 3 Hydroxydecanoate | 3OH-Dec | Metabolites |
| 4 Cholesten 3 One | Chol-3-one | Metabolites |
| 5alpha pregnan 3beta 20alpha diol disulfate | 5Î±Preg-diol-DS | Metabolites |
| Glycochenodeoxycholate glucuronide 1 | GCDCA-GlcA | Metabolites |
| Lithocholate sulfate 1 | LCA-S | Metabolites |
| Glycolithocholate sulfate* | GLCA-S | Metabolites |
| Taurolithocholate 3 Sulfate | TLCA-3S | Metabolites |
| Isoursodeoxycholate | iUDCA | Metabolites |
| Inosine | Ino | Metabolites |
| Propyl 4 Hydroxybenzoate sulfate | Pr-4HB-S | Metabolites |
| 3 Phenylpropionate Hydrocinnamate | HCA | Metabolites |
| Ethyl alpha glucopyranoside | Et-GP | Metabolites |
| Succinimide | Succ | Metabolites |
| DG.34.1 | DG:34.1 | Lipids |
| DG.40.6.DG.18.2_22.4 | DG:40.6 | Lipids |
| HexCer.33.1.4O.HexCer.18.0.3O.15.1..2OH | HexCer:33.1 | Lipids |
| LPC.15.0.0.0 | LPC:15 | Lipids |
| TG.49.3.TG.15.0_16.1_18.2 | TG:49.3 | Lipids |
| TG.50.2.TG.16.0_16.1_18.1 | TG:50.2 | Lipids |
| TG.50.3.TG.16.0_16.1_18.2 | TG:50.3 | Lipids |
| TG.51.2.TG.16.0_17.1_18.1 | TG:51.2 | Lipids |
| CAR.19.4 | CAR:19.4 | Lipids |
| CAR.16.0 | CAR:16 | Lipids |
| DG.34.3.DG.16.1_18.2 | DG:34.3 | Lipids |
| DG.38.3 | DG:38.3 | Lipids |
| DG.40.6 | DG:40.6 | Lipids |
| DG.50.1 | DG:50.1 | Lipids |
| DG.O.35.2.DG.O.21.1_14.1 | DG[O]:35.2 | Lipids |
| LPC.17.0.0.0 | LPC:17 | Lipids |
| LPC.18.0 | LPC:18 | Lipids |
| LPC.18.1.0.0 | LPC:18.1 | Lipids |
| LPC.18.2 | LPC:18.2 | Lipids |
| LPC.19.0.0.0 | LPC:19 | Lipids |
| LPC.20.1.0.0 | LPC:20.1 | Lipids |
| LPC.20.2.0.0 | LPC:20.2 | Lipids |
| LPC.22.6.0.0 | LPC:22.6 | Lipids |
| LPC.O.24.0 | LPC[O]:24.0 | Lipids |
| LPE.20.4 | LPE:20.4 | Lipids |
| NAE.14.1 | NAE:14.1 | Lipids |
| NAE.21.4 | NAE:21.4 | Lipids |
| NAGly.22.3.O | NAGly:22.3 | Lipids |
| PC.32.2.PC.14.0_18.2 | PC:32.2 | Lipids |
| PC.34.2 | PC:34.2 | Lipids |
| PC.36.4b | PC:36.4 | Lipids |
| PC.37.4 | PC:37.4 | Lipids |
| PC.37.6b | PC:37.6 | Lipids |
| PC.38.5.PC.18.1_20.4 | PC:38.5 | Lipids |
| PC.39.5 | PC:39.5 | Lipids |
| PC.40.6 | PC:40.6 | Lipids |
| PC.40.7.PC.18.1_22.6 | PC:40.7 | Lipids |
| PC.42.8 | PC:42.8 | Lipids |
| PE.P.40.4.PE.P.20.0_20.4 | PE:40.4 | Lipids |
| PI.38.4b | PI:38.4 | Lipids |
| SM.32.0.2O | SM:32.0 | Lipids |
| SM.33.0.2O | SM:33.0 | Lipids |
| SM.33.1.2O.SM.17.1.2O.16.0 | SM:33.1 | Lipids |
| SM.38.3.2O.SM.23.1.2O.15.2 | SM:38.3 | Lipids |
| TG.26.0.TG.8.0_8.0_10.0 | TG:26.0 | Lipids |
| TG.52.5.TG.16.0_18.2_18.3 | TG:52.5 | Lipids |
| TG.52.7.TG.18.2_18.2_16.3 | TG:52.7 | Lipids |
| TG.54.4.TG.18.1_18.1_18.2 | TG:54.4 | Lipids |
| TG.54.7.TG.16.0_18.3_20.4 | TG:54.7 | Lipids |
| TG.55.7.TG.15.0_18.2_22.5 | TG:55.7 | Lipids |
| TG.56.4.TG.18.1_20.1_18.2 | TG:56.4 | Lipids |
