# Supplementary material for: Metagenomic and Metabolomic Correlates of Immunotherapy Response in Non-Small Cell Lung Cancer
Source: Research Square preprint supplement (doi:10.21203/rs.3.rs-10107631/v1), 2026-07-09
Supplement: Supplementary file 7 [file ef7c1c6f70ad148c8aa04b64.docx]

**Supplementary Table 5. Strongest associations of microbial species with circulating metabolites among patients diagnosed with NSCLC, N=62.**

| Metabolites | Microbial Species | R2 | P-value |
| --- | --- | --- | --- |
| Adipoylcarnitine-C6-DC | Akkermansia muciniphila | 0.51 | <0.001 |
| Adipoylcarnitine-C6-DC | Escherichia coli | 0.46 | <0.001 |
| Adipoylcarnitine-C6-DC | Fusicatenibacter saccharivorans | 0.38 | 0.02 |
| Adipoylcarnitine-C6-DC | Roseburia inulinivorans | 0.39 | 0.01 |
| Adipoylcarnitine-C6-DC | Ruthenibacterium lactatiformans | 0.37 | 0.02 |
| Betaine | Akkermansia muciniphila | 0.50 | <0.001 |
| Betaine | Flavonifractor plautii | -0.36 | 0.02 |
| Caproate-6-0 | Anaerostipes hadrus | 0.33 | 0.04 |
| Caproate-6-0 | Escherichia coli | 0.33 | 0.04 |
| Caproate-6-0 | Roseburia faecis | 0.47 | <0.001 |
| Ethyl-Alpha-Glucopyranoside | Clostridium innocuum | -0.38 | 0.02 |
| Ethyl-Alpha-Glucopyranoside | Fusicatenibacter saccharivorans | 0.34 | 0.03 |
| Fructose | Bifidobacterium longum | 0.42 | <0.001 |
| Gamma-Glutamylhistidine | Roseburia faecis | 0.40 | 0.01 |
| Glucose | Erysipelatoclostridum (Genus) | 0.43 | <0.001 |
| Glutarate-C5-Dc- | Ruthenibacterium lactatiformans | -0.42 | <0.001 |
| Glycochenodeoxycholate-Glucuronide-1 | Ruthenibacterium lactatiformans | 0.37 | 0.02 |
| Glycolithocholate-Sulfate* | Fusicatenibacter saccharivorans | 0.38 | 0.02 |
| Glycolithocholate-Sulfate* | Roseburia inulinivorans | 0.52 | <0.001 |
| Glycolithocholate-Sulfate* | Ruthenibacterium lactatiformans | 0.35 | 0.03 |
| Inosine | Anaerostipes hadrus | -0.36 | 0.02 |
| Inosine | Clostridium clostridioforme | 0.38 | 0.02 |
| Inosine | Flavonifractor plautii | 0.35 | 0.03 |
| Inosine | Roseburia faecis | -0.39 | 0.01 |
| Inosine | Roseburia inulinivorans | -0.34 | 0.03 |
| Isoursodeoxycholate | Clostridium clostridioforme | 0.33 | 0.04 |
| Isoursodeoxycholate | Erysipelatoclostridium ramosum | 0.39 | 0.01 |
| Lithocholate-Sulfate-1- | Akkermansia muciniphila | 0.34 | 0.04 |
| Lithocholate-Sulfate-1- | Blautia Sp cag 257 | -0.34 | 0.03 |
| Lithocholate-Sulfate-1- | Ruthenibacterium lactatiformans | 0.34 | 0.03 |
| N-N-Dimethylalanine | Anaerostipes hadrus | -0.39 | 0.01 |
| N-N-Dimethylalanine | Erysipelatoclostridium ramosum | -0.33 | 0.04 |
| Propyl-4-Hydroxybenzoate-Sulfate | Blautia Sp Cag 257 | -0.41 | <0.001 |
| Propyl-4-Hydroxybenzoate-Sulfate | Roseburia inulinivorans | 0.33 | 0.04 |
| Stearoylcarnitine-C18- | Erysipelatoclostridium ramosum | -0.45 | <0.001 |
| Stearoylcarnitine-C18- | Roseburia faecis | 0.35 | 0.03 |
| Stearoylcarnitine-C18- | Roseburia inulinivorans | 0.32 | 0.04 |
| Succinimide | Anaerostipes hadrus | -0.42 | <0.001 |
| Succinimide | Clostridium innocuum | 0.49 | <0.001 |
| Succinimide | Ruthenibacterium lactatiformans | 0.41 | <0.001 |
| Taurolithocholate-3-Sulfate | Roseburia inulinivorans | 0.45 | <0.001 |
| Taurolithocholate-3-Sulfate | Ruthenibacterium lactatiformans | 0.43 | <0.001 |
| Trans-2-Hexenoylglycine | Akkermansia muciniphila | 0.35 | 0.03 |
| Trans-2-Hexenoylglycine | Alistipes Putredinis | 0.36 | 0.02 |
| Trans-2-Hexenoylglycine | Clostridium clostridioforme | -0.49 | <0.001 |
| Trans-2-Hexenoylglycine | Fusicatenibacter saccharivorans | 0.35 | 0.03 |
| 1-Carboxyethylisoleucine | Akkermansia muciniphila | -0.36 | 0.02 |
| 1-Carboxyethylisoleucine | Alistipes Putredinis | -0.39 | 0.02 |
| 1-Carboxyethylisoleucine | Clostridium clostridioforme | 0.46 | <0.001 |
| 1-Carboxyethylisoleucine | Flavonifractor plautii | 0.44 | <0.001 |
| 3-Hydroxybutyrate-Bhba- | Clostridium clostridioforme | -0.41 | <0.001 |
| 3-Hydroxybutyrate-Bhba- | Clostridium innocuum | -0.36 | 0.03 |
| 3-Hydroxybutyrate-Bhba- | Erysipelatoclostridium ramosum | -0.34 | 0.03 |
| 3-Hydroxybutyrate-Bhba- | Fusicatenibacter saccharivorans | 0.39 | 0.01 |
| 3-Hydroxydecanoate | Clostridium innocuum | -0.42 | <0.001 |
| 3-Hydroxydecanoate | Fusicatenibacter saccharivorans | 0.43 | <0.001 |
| 3-Hydroxyoctanoate | Akkermansia muciniphila | 0.35 | 0.03 |
| 3-Hydroxyoctanoate | Blautia Sp cag 257 | -0.34 | 0.03 |
| 3-Hydroxyoctanoate | Clostridium clostridioforme | -0.35 | 0.03 |
| 3-Hydroxyoctanoate | Fusicatenibacter saccharivorans | 0.48 | <0.001 |
| 3-Phenylpropionate-Hydrocinnamate- | Akkermansia muciniphila | 0.33 | 0.04 |
| 3-Phenylpropionate-Hydrocinnamate- | Flavonifractor plautii | -0.36 | 0.03 |
| 3-5 Dichloro-2,6-dihydroxy benzoic acid | Bifidobacterium longum | -0.54 | <0.001 |
| 3-Indoxyl sulfate | Bifidobacterium longum | -0.39 | <0.001 |
| 4-Cholesten-3-One | Anaerostipes hadrus | 0.44 | <0.001 |
| 4-Methyl-2-Oxopentanoate | Fusicatenibacter saccharivorans | 0.33 | 0.04 |
| 5alpha-Pregnan-3beta-20alpha-Diol-Disulfate | Blautia Sp cag 257 | -0.36 | 0.03 |
| 5alpha-Pregnan-3beta-20alpha-Diol-Disulfate | Flavonifractor plautii | -0.35 | 0.03 |
| 5alpha-Pregnan-3beta-20alpha-Diol-Disulfate | Fusicatenibacter saccharivorans | 0.36 | 0.02 |
| Xylose | Anaerostipes hadrus | -0.35 | 0.03 |
| Xylose | Roseburia inulinivorans | -0.43 | <0.001 |

Coefficients of partial Spearman for the strongest correlation tests between CLR z-score transformed microbiome relative abundance at the species level with normalized and z-scored transformed circulating metabolites. Models were adjusted for sex, age at diagnosis, BMI (kg/m2), additional treatment (chemotherapy, radiation, or targeted therapy), antibiotic use two months prior to collection, PPI use, and probiotic use.
